# Supplementary material
Source: MDPI journal article supplement (https://www.mdpi.com/1999-4907/14/2/417)
Supplement: s1 [file s1]

Archive with 2 entries (2 files):
- forests-2175642-Supplementary Figures.pdf
- Supplementary Table.xlsx
