# Supplementary material
Source: MDPI journal article supplement (https://www.mdpi.com/1999-4907/14/2/417)
Supplement: s1 [file s1 › Supplementary Table.xlsx]

## Sheet: Table S1
Table S1. All primers were used for qRT-PCR analysis
	Gene	Forward Primer (5’-3’)	Reverse Primer (5’-3’)
PA vs SA	PaLWMG0403586700.01	AGCAAGTGTGCCGACTGTGAC	TGGAGCGGTTCTCAGTCTCAAC
	PaLWMG0605465500.01	GCCAGGTGGTGAACAGTCTGAC	TGTGGTCTGAGCCATGCTGTAG
	PaLWMG0504632400.01	GGCCTACTTTTGAAGGTTAACCAG	AGCTCCTGTCTTTATCTGTCCAC
	PaLWMG0202210000.01	GCCCTTGTCGGTGTGCCAATCT	TAGCCGAAACGGCCTGCACTTC
	PaLWMG0605564200.01	GCTGTGGACCCATGTTTGGTGG	AGCAGCAGCAGCCAGCTCATA
	PaLWMG0806575900.01	TCCTCGGCGATGGCATCTTC	GTACCCAAATGCGATTCTGCCA
	PaLWMG0810922200.01	AGAGCTGCGGTAGCATGGGAA	CGGCTTCATGACCGTAAATGCGA
	PaLWMG0303273400.01	GTGTCACAGCAGCACAGGCA	CACTGCACAGGAGCACCACA
	PaLWMG0504444200.01	CTGGCGGTTTGTGAATTACTTGAG	CAATCATCAGGCAAAAAATCAGTCAAAC
	PaLWMG0706125900.01	TCCAGGGCTCCCCAATTGAG	GACCAACAAAGGGTGCTTCTGAG
	PaLWMG0806499300.01	CACCTATCATATCCCAGGCGTTAAG	CGTGCTGACTGATTTCGTCGG
AP vs SA	PaLWMG0709622600.01	GTAGGCAAGGGAAGTCGGCAAA	CGACAGCCGACGGGTT
	PaLWMG0806492100.01	GACGAGCGAAATCACCCGAC	CTCTTCGAAGATCTGGAGCACCGA
	PaLWMG0706125100.01	TCATCAGTCGGTAGAGGCCC	CACCAATTTGGGCTCCTGTTG
	PaLWMG0504262300.01	AAGAGGACAAAGAAGGCGGG	TTTTCACAGCATACTTGCCGC
	PaLWMG0504616500.01	GGTCGTGGAGTTAGCAGTGGAG	AGGTGTTGTTGGAGCAGTAGGC
	PaLWMG0100651800.01	TCGACCCAACCACAGCTTACCA	CCCAATCGTCTGCGTTCCACAA
	PaLWMG0202327101.01	CCAGATTTGCACGCCGACAAGG	AGGAGCCTGAGGACAACCTACG
	PaLWMG0504632400.01	GGCCTACTTTTGAAGGTTAACCAG	AGCTCCTGTCTTTATCTGTCCAC
	PaLWMG0605564200.01	GCTGTGGACCCATGTTTGGTGG	AGCAGCAGCAGCCAGCTCATA
	PaLWMG0810922200.01	AGAGCTGCGGTAGCATGGGAA	CGGCTTCATGACCGTAAATGCGA
	PaLWMG0504348600.01	AGGTGAGGATTTCATGGGCAGT	GGAAGATTGGCGGCTCAGTCTC
	PaLWMG0806926800.01	CTCGCTGTGGCTCTCCAACTTG	CCTTGCTGAGGGCTTGCTTGAG
	Actin	GTGCCTGCCATGTATGTTGCCA	CAGTGGTGGTGAACATGTACCCYC

## Sheet: Table S2
Table S2. Statistics of transcript data of nine samples
Sample	Raw Data		Valid Data		Valid Ratio(reads)	Q20%	Q30%	GC content%
	Read	Base	Read	Base
Apricot+Peach 1 (AP1)	72076956	10.81G	46939976	7.04G	65.12	99.96	97.56	50
Apricot+Peach 2 (AP2)	96189396	14.43G	64761498	9.71G	67.33	99.99	98.22	49
Apricot+Peach 3 (AP3)	91870310	13.78G	60688666	9.10G	66.06	99.99	98.2	50
Peach+Apricot 1 (PA1)	91508228	13.73G	61568026	9.24G	67.28	99.99	98.27	50
Peach+Apricot 2 (PA2)	94009126	14.10G	62110866	9.32G	66.07	99.99	98.12	48
Peach+Apricot 3 (PA3)	91163154	13.67G	60714636	9.11G	66.6	99.99	98.08	48.5
Self-root Apricot 1 (SA1)	89772082	13.47G	53834174	8.08G	59.97	99.99	98.2	49
Self-root Apricot 2 (SA2)	90445240	13.57G	61043638	9.16G	67.49	99.99	98.03	48
Self-root Apricot 3 (SA3)	95762202	14.36G	61895162	9.28G	64.63	99.99	98.1	49

## Sheet: Table S3
Table S3. Statistics and analysis of all identified proteins
Accession	Coverage [%]	Peptides	Peptide Spectrum Matches	Unique Peptides	Amino Acids	Molecular Weight [kDa]	Isoelectric Point	Abundances AP1	Abundances AP2	Abundances AP3	Abundances PA1	Abundances PA2	Abundances PA3	Abundances SA1	Abundances SA2	Abundances SA3
PaLWMG0605370900.01.P01	69	44	333	15	647	70.8	5.25	120.2	109.1	100	99.5	102.7	102.4	126.7	64.4	75
PaLWMG0100886300.01.P01	59	24	197	4	560	60.1	6.2	107.8	103.2	110.3	95.3	94.9	96.2	92.3	89.7	110.3
PaLWMG0605041300.01.P01	64	30	186	28	585	61.8	5.24	113.8	84.7	107.4	95.2	93.5	92.5	150.7	75.7	86.4
PaLWMG0100705400.01.P01	80	23	228	12	340	37	7.52	106	108.9	91.6	109.4	115.9	118.1	97.9	68.2	83.7
PaLWMG0604772500.01.P01	69	41	213	39	605	64.4	5.83	115.4	83.8	110.7	84.3	83.9	84.1	158.7	82.7	96.4
PaLWMG0504720500.01.P01	61	25	177	5	549	59.1	6.29	113.4	105.4	111.5	92.6	89.2	92.2	107.3	80.6	107.9
PaLWMG0708928900.01.P02	71	18	177	9	306	32.7	7.46	106	105.9	100.8	100	99.5	103	84	96.9	103.9
PaLWMG0604842200.01.P01	59	48	258	34	699	80.1	5.05	117.2	100	98.2	96	96.4	98.7	140	68.7	84.6
PaLWMG0706275500.01.P02	52	35	246	29	765	84.6	6.51	122.2	105.1	105	99.6	100.8	101.6	105.4	71.4	88.9
PaLWMG0605185000.01.P02	55	17	185	4	377	41.7	5.49	113.6	105.7	109.2	95.6	98.6	98	97	85.7	96.6
PaLWMG0202327000.01.P01	59	23	147	14	446	48.3	6.37	102	99.6	99	99.6	101.5	103.9	81	101.2	112.2
PaLWMG0806925400.01.P02	49	36	174	23	734	79.4	7.4	110.9	99.5	103.5	102.9	102	101.9	106	78.2	95.2
PaLWMG0202217800.01.P01	63	38	205	10	649	71.2	5.25	108.3	106.8	100.4	104.6	105.1	102.4	112.3	79.9	80.3
PaLWMG0202222300.01.P01	55	17	152	2	377	41.7	5.49	100.9	137.3	93.4	98.3	102.4	99.3	76.1	83.6	108.8
PaLWMG0504452900.01.P01	51	16	151	4	377	41.7	5.49	104.3	110.7	106.3	97.7	97.7	100.1	68.1	104.8	110.3
PaLWMG0100523100.01.P01	65	27	152	27	485	53.3	6.19	113.9	119.1	98.7	100.6	103.9	103.7	115.8	68.4	75.9
PaLWMG0706069100.01.P01	55	17	155	2	377	41.7	5.49	105.9	140.6	98.2	95.8	95.8	99.4	83	70.7	110.5
PaLWMG0605373900.01.P01	55	17	156	2	377	41.6	5.49	113.7	100.1	99.3	94.9	94.5	97	119.8	78.9	101.7
PaLWMG0605411800.01.P01	65	22	172	6	447	50.3	4.83	102.4	88.2	109.9	91.7	93.1	92	138.8	84.2	99.7
PaLWMG0604935500.01.P01	61	18	175	3	414	45.8	7.18	106.6	92.7	113.8	93.5	88.5	89.4	122.4	87.1	106
PaLWMG0100228900.01.P02	57	39	165	39	709	75.5	5.22	103.5	89.4	100.6	97.5	97.1	97.9	141.3	81.7	91
PaLWMG0605516500.01.P01	66	28	164	28	421	48.4	4.54	87.9	92.9	103	98.1	98.6	99.6	73.7	135.9	110.2
PaLWMG0604952100.01.P01	58	24	126	13	475	51.9	6.44	99.2	85.6	106.4	97.9	98	99.1	130	90	94
PaLWMG0403725400.01.P01	59	25	119	20	480	50.4	8.51	109.4	85.1	109.3	94.2	95.6	95.8	129.6	82.4	98.7
PaLWMG0605348400.01.P01	51	17	143	6	307	34.6	10.29	95.2	85.7	102	102.8	99.3	100.6	97.8	108	108.7
PaLWMG0302743000.01.P01	73	55	118	55	838	93.4	4.59	107.4	131.8	107.8	95.3	94.9	94.5	60.3	95.7	112.4
PaLWMG0100139300.01.P01	56	23	218	3	458	50.9	8.09	101.5	98.3	94.6	94.7	94.2	95.2	113.2	85.9	122.4
PaLWMG0302533500.01.P01	57	20	127	2	450	49.7	5.1	124.4	81.4	115.1	84.1	81.3	80	174.8	68.4	90.6
PaLWMG0101344500.01.P01	56	20	138	1	451	49.6	5.1	119.5	100.2	115.7	88	86.7	86.6	113.8	83.3	106.2
PaLWMG0100976700.01.P03	47	37	129	36	815	93.3	5.03	104	94.5	101.4	102.8	103	104.2	110	83.6	96.5
PaLWMG0504488800.01.P01	65	19	140	8	339	36.8	6.96	112.7	108.2	105.7	105.4	105.7	105.7	98.7	72.3	85.6
PaLWMG0806744400.01.P01	69	10	149	9	173	18.2	8.47	90.5	93.1	105.1	95.1	94	97	89.1	127.7	108.3
PaLWMG0101297100.01.P01	69	18	130	13	262	29.6	4.84	96.6	93	97.3	100.6	100.6	102.4	86.1	112.3	111
PaLWMG0302594900.01.P02	68	29	122	26	488	53.7	6.95	107.5	111.8	105.1	94	97.1	99.1	80	96	109.4
PaLWMG0504463100.01.P01	61	42	135	39	692	77.2	5.38	107.3	88.9	106.2	89.9	91.3	90.4	150.7	79.3	96.2
PaLWMG0806953600.01.P01	69	16	123	10	262	29.5	4.86	94.9	96.3	95.6	98	98.5	100.2	86.7	116.7	113.2
PaLWMG0403725200.01.P02	65	27	123	22	405	42.9	6.46	112.2	107.6	104.2	96.3	100.5	100.7	101.4	80.5	96.5
PaLWMG0605018400.01.P01	54	15	191	2	292	32	9.32	95.2	82.2	89	96	96.8	98.4	114.2	96.3	131.9
PaLWMG0605288100.01.P01	57	20	124	3	451	49.6	5.06	115.8	98.8	112.3	93.1	89.2	89.2	129.7	73.8	98.1
PaLWMG0202232400.01.P01	55	23	94	12	474	51.9	5.34	96.4	63	103.6	100.8	100.3	97.6	173.7	78.6	86
PaLWMG0504619300.01.P01	80	25	130	11	361	41	5.97	98.6	88.6	95.6	103.7	102	101.3	111.5	101.1	97.6
PaLWMG0403634400.01.P01	55	53	147	31	965	110	6.47	117.1	131.3	106	98.1	98.4	100	88.2	72.4	88.6
PaLWMG0705887500.01.P01	62	23	109	23	563	62.5	5.92	88.9	124	62.1	95.4	97.8	102	45.9	146.9	137
PaLWMG0302854000.01.P02	69	13	110	12	182	20.3	8.84	89.7	69.6	80.3	86	94.5	87.3	218.5	92.9	81.1
PaLWMG0403617800.01.P01	48	11	82	6	339	35.6	8.87	103	90.2	106.4	104.3	98.1	100.6	76.5	116.8	104.1
PaLWMG0201495200.01.P02	43	38	127	4	919	103.5	6.4	123.5	73.1	104.8	96.8	95.1	100.7	159.1	72.9	74
PaLWMG0100044800.01.P01	50	14	91	10	332	35.5	6.54	118.1	97.8	107.6	95.2	95	95.7	102.2	88.6	99.9
PaLWMG0403436500.01.P01	31	8	77	8	410	43.5	6.8	80.8	92.9	96.3	94.6	97.1	100.2	69.4	144.9	123.7
PaLWMG0100178900.01.P04	66	32	122	21	577	61.2	5.47	112.2	90.8	107.1	91.3	91.1	91.2	131.9	80.3	104.1
PaLWMG0806882500.01.P01	75	11	95	11	178	17.3	8.13	84.6	83.3	98.2	100.3	99.8	102.1	88.5	135.2	108.1
PaLWMG0605019300.01.P01	52	14	184	4	300	32.9	9.1	114.5	119.5	104.5	108	103.7	105.7	76.1	76.2	91.8
PaLWMG0100939500.01.P05	42	33	138	33	663	69.6	5.19	88.9	85.9	99.1	102.9	102.3	100.2	89.7	122.6	108.3
PaLWMG0705656000.01.P01	57	27	99	27	574	59.7	7.33	113.5	109.7	103.9	95.6	96.5	96.3	136.4	68.2	79.8
PaLWMG0100331700.01.P01	87	14	96	14	160	17.3	5.22	84.6	79.3	106.1	106.2	109.1	112.6	48.1	139.7	114.2
PaLWMG0101074500.01.P01	37	32	84	32	1054	114.6	7.09	112.9	102.1	103.3	93.1	96.2	91.8	143	71.2	86.4
PaLWMG0100228700.01.P01	53	22	132	11	408	44.9	10.32	91.9	85.5	96	100.3	100.5	101.7	116.2	108	99.8
PaLWMG0303259800.01.P01	68	23	107	23	377	41.7	7.18	106.7	134.2	97.5	104.4	107	106.4	82.1	74.7	86.9
PaLWMG0605043200.01.P01	43	33	109	13	803	89.3	5.24	111.1	105.2	103.4	99.5	99.7	98.6	118.9	76.1	87.6
PaLWMG0605598600.01.P01	76	12	101	12	140	15	10.48	87	80.2	98.7	107.8	107.5	107.3	125.5	95.7	90.3
PaLWMG0403532600.01.P01	46	11	74	11	308	32.4	5.34	94.6	78.4	93.8	107.6	106.1	104.9	127.6	88.6	98.3
PaLWMG0605331300.01.P01	45	27	102	7	681	76.2	5.95	114.7	112.1	104	93.8	96.1	98	126.7	68.4	86.1
PaLWMG0100835300.01.P05	53	38	103	35	799	90.3	5.07	112.9	83.8	102.8	95.8	93	92.8	157.2	76.3	85.3
PaLWMG0806623500.01.P01	65	29	117	19	478	51.2	8.13	118.5	105.6	107.5	95.5	94.6	95.6	107.1	74.3	101.4
PaLWMG0705975400.01.P01	66	28	107	23	527	57.2	7.28	117.1	134.1	103.7	107.5	108.7	107.7	84.2	64.9	72
PaLWMG0807242200.01.P01	58	50	110	50	925	100.2	9.11	109.2	98.1	106.6	94.4	93.4	92.3	108	92.6	105.4
PaLWMG0605064400.01.P02	50	24	133	1	545	61.7	6.19	108.1	93.2	103.9	97.7	105.8	133.7	75.2	89.8	92.7
PaLWMG0605063800.01.P01	48	24	133	1	563	63.8	6.73	61.9	72.7	76.1	98.1	70.3	95.5	249.6	86.3	89.5
PaLWMG0705802100.01.P01	72	15	87	15	252	26.5	8.19	96.4	88.4	96.7	114.5	111.2	112.9	112.9	82.8	84.2
PaLWMG0705983700.01.P01	70	15	80	14	270	29.2	5.36	100.1	92.8	102.8	100.1	100.4	104.4	87.6	104	107.8
PaLWMG0806384300.01.P01	76	16	91	7	334	36.4	5.8	96.5	82.5	91	97.6	95.6	95.6	175.8	79.9	85.5
PaLWMG0100293000.01.P01	73	20	97	7	393	42.9	6.05	114.3	106.5	106.5	87.7	89.4	93.7	95.7	98.1	108
PaLWMG0303178600.01.P02	62	23	95	6	413	46.9	5.69	112.7	99.2	100.5	98.5	101.9	102	123.4	76.8	85
PaLWMG0100961700.01.P01	57	26	83	26	527	57	6.06	118.7	92	107.8	94.4	94.2	91	134.1	76.3	91.5
PaLWMG0100413300.01.P01	54	5	48	5	140	14.6	8	89.1	84.7	103.9	102.9	101.1	98	91.5	121.4	107.5
PaLWMG0806827800.01.P01	54	54	118	50	1086	121.6	5.69	97.6	90.7	106.8	94.5	92.6	92	128.2	94.1	103.5
PaLWMG0706197800.01.P01	53	18	115	4	446	50.2	4.89	109	82	108.9	94.7	90.4	94	137.2	86.4	97.4
PaLWMG0201613700.01.P01	24	8	85	8	389	41.6	8.28	86	102	99.7	92.3	95.3	95.4	72.4	144.9	112
PaLWMG0101168400.01.P01	46	40	108	17	955	105.2	7.37	102.1	160.9	108.5	107.8	108.9	108.1	61.4	69	73.4
PaLWMG0100331900.01.P01	83	13	72	10	160	17.6	6.2	98.9	116.3	113.7	103.7	109.8	111.8	55.2	102.8	87.7
PaLWMG0504149000.01.P06	50	15	91	15	358	42	7.36	114.1	106.6	116.9	95.8	96.7	96.9	63.1	98.1	111.8
PaLWMG0302610200.01.P02	57	15	121	10	267	30.2	4.97	105.2	97.7	102.1	100.7	102	103.4	102.8	91.6	94.5
PaLWMG0302801400.01.P01	51	30	76	30	749	81.6	6.51	113.7	106.5	108.5	93	96.4	94.8	115.3	78.1	93.8
PaLWMG0303235700.01.P03	60	33	102	33	623	68.7	5.45	104.1	108.9	103.1	96.3	98.6	102	87.4	97.1	102.5
PaLWMG0100004001.01.P01	67	19	107	10	260	29.7	10.02	100.6	85.5	88.9	105.3	105.8	105	100.9	107.5	100.7
PaLWMG0100414400.01.P01	55	23	101	23	471	51.9	7.5	109.4	98.8	105.6	90.2	93.7	96.2	109.7	90.8	105.4
PaLWMG0201495400.01.P01	37	31	106	2	855	96.7	6.65	139	123.2	124.5	93.6	94.5	95.2	62.4	74.5	93.1
PaLWMG0303259200.01.P01	64	19	82	12	319	35.7	7.49	113.3	118.8	97.7	104	105.3	111.1	112.1	59.7	78
PaLWMG0605530000.01.P01	77	28	92	27	423	47.5	5.11	101.8	93.8	105.9	94.4	93.6	94.7	113.9	94	107.9
PaLWMG0806555300.01.P01	63	14	73	14	152	17.6	10.67	81.5	79.4	90.8	106.6	104.5	104.7	83.6	139.9	108.9
PaLWMG0705781000.01.P02	60	22	97	5	411	46.7	5.58	119	114.8	98.5	102.5	102.4	102.4	108.8	69.8	81.8
PaLWMG0100258800.01.P01	34	14	72	11	574	61.9	5.1	95	96.6	106.3	100.6	99.7	103.3	86.3	108.9	103.1
PaLWMG0403708800.01.P01	43	18	88	10	466	52.8	8.18	113.6	100.7	97.2	101.5	104.7	99.8	137.2	69.1	76.4
PaLWMG0302697800.01.P01	45	16	79	3	449	47.2	7.44	90.1	125	78.2	88.4	88.7	93.2	55.9	149.9	130.6
PaLWMG0504507400.01.P01	33	8	53	8	298	33	4.86	95.6	75.6	100.5	109.6	109.4	109	125.4	84.2	90.7
PaLWMG0605484600.01.P02	50	27	113	26	559	61.2	5.77	110.1	109.3	106	90	92	91.7	88.4	98.7	113.7
PaLWMG0100905300.01.P01	55	31	97	31	582	63.3	5.95	99.9	115.4	97.2	93.3	94.4	98.1	73.3	105.6	122.7
PaLWMG0302432300.01.P01	50	19	75	14	406	43.2	7.97	111.8	88.7	96.7	106.7	104.9	105.1	150.1	62.1	73.8
PaLWMG0604776300.01.P01	45	16	91	1	450	49.6	5.14	112.9	111.9	109.7	87.9	88.6	89.6	104.5	100.8	94
PaLWMG0504557900.01.P01	42	37	98	19	956	105.3	6.35	107.4	119.6	102.7	105.6	102.1	104.4	93.7	78.1	86.4
PaLWMG0303621800.01.P01	43	39	85	35	981	110.2	6.61	106.4	101.6	107	94.1	92.8	93.3	108	89.4	107.5
PaLWMG0302949600.01.P01	51	52	117	31	966	110.1	6.49	108.6	118.7	103.3	97.2	98	102.2	94.4	82.2	95.4
PaLWMG0705861000.01.P01	56	19	73	19	365	40.7	8.44	94.7	75.7	93.7	102.6	100.6	100.3	151	90.9	90.6
PaLWMG0604980400.01.P01	61	14	101	6	290	31.8	10.08	69	86.2	86.7	101.5	103.2	105.9	92.3	141.4	113.7
PaLWMG0403340100.01.P02	75	15	72	10	189	21.7	4.94	70.8	83.7	83.7	109.2	106.3	103.4	99.7	132.3	110.9
PaLWMG0708739500.01.P03	43	18	73	18	428	47.5	8.63	105.6	102.7	101.9	96.8	95.8	99.5	85.3	98.9	113.5
PaLWMG0100499200.01.P01	44	22	77	21	653	71.3	8.25	91.2	78.3	101	100.5	99.2	101.7	128.3	97.7	102.2
PaLWMG0605066900.01.P01	54	20	80	20	390	43.8	6	107.1	106.6	107.4	95.4	95.6	95.9	87.6	101	103.4
PaLWMG0101061500.01.P02	77	18	78	3	237	26.3	9.69	116	94.7	93	110.5	110.7	112.4	106.8	73.6	82.4
PaLWMG0100301900.01.P01	47	18	68	18	449	47.8	7.39	113.2	119.6	105.4	102	102.7	103.1	92.4	70.5	91.2
PaLWMG0705850600.01.P03	43	33	92	30	930	102.1	6.47	111.6	118.8	103.1	103	103.2	104	100.1	78.7	77.5
PaLWMG0201935900.01.P01	56	17	67	13	367	39.4	7.27	75.6	93	94.4	105.9	108.8	110.4	73.5	127.2	111.3
PaLWMG0806624400.01.P01	59	23	77	23	446	49.7	5.67	99.6	98.6	96.5	104.1	102.6	103.5	107.6	86.5	101.1
PaLWMG0303031400.01.P02	53	28	68	27	701	74.8	6.07	103.6	91.8	114.3	95.1	96	94	123.8	83.5	97.8
PaLWMG0302528200.01.P01	67	13	60	10	275	29.4	8.46	104.9	98.2	100.3	107.2	107.6	108.5	95.5	85.9	91.7
PaLWMG0810173700.01.P01	66	11	69	4	163	18.2	6.33	76.8	113.3	73.5	86.4	87.4	89.1	54.1	175.8	143.5
PaLWMG0604927500.01.P01	52	36	76	36	846	95.9	7.74	107.7	133.6	105.8	99.5	101.3	103.8	69.6	83.8	94.8
PaLWMG0605604500.01.P01	58	18	62	18	405	44.3	9.13	94.3	88.1	104.1	101.7	98.9	99.9	88.6	116.1	108.3
PaLWMG0302559100.01.P01	44	23	79	23	532	59.3	7.3	104.7	101.4	103	94.8	96.5	96.5	85	101.6	116.5
PaLWMG0605058900.01.P01	56	10	89	2	144	16	10.05	60.9	72.6	78.5	98.9	98.9	102.7	129.6	145.8	112
PaLWMG0100313800.01.P01	46	21	73	21	569	61.4	7.93	123.2	101	103.2	96.7	97.5	98.2	130.8	66.6	83
PaLWMG0403469900.01.P01	50	12	77	7	225	25.2	10.46	103.8	90.2	87.9	118.6	114.8	112.6	109.8	81.6	80.6
PaLWMG0100806000.01.P01	62	21	65	21	422	47.1	6.29	107.4	93.8	107.3	99.2	99.6	98.6	110.6	88.3	95.2
PaLWMG0806878600.01.P01	45	32	78	32	826	92.2	5.12	113.4	113.5	108.5	94.4	96	96.8	110.6	77.2	89.7
PaLWMG0302698600.01.P01	24	15	67	3	825	87.6	8.47	79.4	131.1	80.8	86.5	87.9	99.5	51.5	144.3	139
PaLWMG0304476100.01.P01	43	36	88	21	954	104.9	6.37	85.2	173.2	78.7	109.3	109.3	110	50	88.1	96.1
PaLWMG0605366300.01.P01	48	7	81	1	134	14.9	9.96	102.6	90.9	96.2	96.6	103.4	98.9	114.8	107.8	88.7
PaLWMG0403827700.01.P01	52	17	98	1	444	49.9	4.86	99.8	97.5	105	115.3	89.1	99.7	102.7	89.2	101.5
PaLWMG0504456500.01.P01	55	22	69	22	541	59.3	6.02	116	125.1	99.8	107.3	109.2	109.3	101.7	60.6	71
PaLWMG0101029700.01.P01	62	21	77	21	387	42.1	6.02	102.6	92.2	107.3	98.8	99.3	99.6	105.3	94.1	100.9
PaLWMG0303144400.01.P01	41	15	62	15	503	53.9	5.96	108.2	104.2	108.2	92.2	93.6	93	86.8	93.4	120.5
PaLWMG0705789200.01.P01	65	17	75	1	246	27.2	9.6	98.5	96.4	85.5	111.7	112.7	111.3	97.7	93.2	92.9
PaLWMG0403962100.01.P01	36	23	108	22	597	67.1	6.84	99.7	114.9	101.5	92.6	94.9	91	103.4	102.8	99.4
PaLWMG0705901100.01.P01	45	24	58	24	642	71.5	6.19	111.7	112.8	106.8	101.2	100.1	102.2	95.9	77.1	92.4
PaLWMG0504729700.01.P01	54	18	98	4	448	50.1	4.83	87.2	128.2	89.7	99.8	104.7	111.2	58.8	103	117.3
PaLWMG0806745700.01.P02	68	19	66	18	318	33.9	8.12	104.4	87.4	112.7	97.2	96.1	98.2	103.7	102.7	97.6
PaLWMG0101032200.01.P01	68	25	81	24	410	45	7.87	100.4	97.7	102.3	92.2	92.5	94.2	100.7	105.5	114.6
PaLWMG0504161900.01.P01	34	13	75	13	504	55.4	9.04	96.4	96.8	105	95.4	94.7	99.7	65.4	126.6	120
PaLWMG0101314600.01.P01	44	38	90	38	935	106.2	5.49	111.8	94.2	111.4	90.9	90.9	90.5	122.5	89.9	97.9
PaLWMG0810172900.01.P01	57	11	68	2	163	18.2	5.39	85.9	114.4	84.6	93.2	94.6	97.3	56.7	148.8	124.5
PaLWMG0101240700.01.P02	51	20	78	18	375	41.9	5.17	106.8	107.1	109.1	95.3	96.9	100.5	79	97.9	107.6
PaLWMG0706250400.01.P01	60	7	45	4	201	22	4.46	81.2	89.9	92.1	110.4	107.3	105.9	82.3	121.5	109.3
PaLWMG0201992300.01.P01	37	19	68	19	583	63.2	6.64	128.1	116	100.2	96.5	98.1	97.7	119.2	64.5	79.7
PaLWMG0303186800.01.P01	60	18	74	2	299	33.3	9.72	100.2	85.6	96.9	112.5	111.5	112.8	112	83	85.4
PaLWMG0504430100.01.P01	65	17	116	15	226	25.4	4.73	103.6	104.9	101.1	100.2	100.8	102.7	90.2	89.3	107
PaLWMG0100825200.01.P01	49	20	88	7	452	51	5.55	89	87	95.8	100.1	97.9	98.2	113	118.2	100.9
PaLWMG0100958400.01.P01	66	17	57	17	343	37.3	5.41	112.8	92.8	113.8	93.9	93.4	92.8	133.5	75	91.9
PaLWMG0504382200.01.P02	45	37	91	37	981	110.5	6.65	117.6	116.4	101.6	100.2	102.4	100.6	118.7	68.2	74.3
PaLWMG0303049500.01.P01	21	16	89	2	752	82.3	5.4	97	152.4	85.2	105.6	123.4	136.6	57.8	48.4	93.6
PaLWMG0806757500.01.P01	33	10	64	1	278	30.4	5.87	86	102.1	92.8	103	99.6	99.1	60.4	136.7	120.3
PaLWMG0806906100.01.P01	55	16	68	15	327	35.5	5.77	110.7	78.1	98.5	102.1	101.6	100.3	168.2	67.6	73
PaLWMG0202258300.01.P04	38	31	70	14	929	106.7	5.22	115.9	124.3	102.2	97.5	98.4	97.8	134.3	63	66.6
PaLWMG0100624800.01.P01	70	17	71	17	260	28.1	10.89	98.6	85.6	89.9	108.5	107.4	105.1	118.5	94.7	91.6
PaLWMG0504516300.01.P01	46	18	82	17	484	52.5	6.54	104.7	76.6	104.4	97.5	97.5	96.6	162.1	73.3	87.3
PaLWMG0504484900.01.P02	61	14	75	14	233	25.7	8.13	82.7	93.5	96.1	99.4	98.3	99.4	71.4	135.9	123.3
PaLWMG0101067500.01.P01	45	18	84	2	413	46.6	5.8	105.4	101.6	94.5	101.2	102.8	101.6	131.8	77.6	83.5
PaLWMG0605337700.01.P01	73	11	68	11	166	17.8	8.91	89.9	79.9	101	104.5	110.1	110.2	107.7	108.8	87.9
PaLWMG0100965700.01.P01	39	3	48	3	166	16.6	5.2	71.1	75.9	91.6	101.4	100.3	103.8	102.3	140	113.6
PaLWMG0806372000.01.P01	54	24	67	24	531	58.4	5.72	108.7	116.7	103	106.4	106.7	107.3	101	71.8	78.3
PaLWMG0100750000.01.P01	64	17	54	16	304	32.3	7.97	86	78	99.4	99.3	96.2	96.7	119.3	114.9	110.2
PaLWMG0605280900.01.P01	49	34	80	34	800	89.9	6.79	102.9	103.4	104.9	95.3	95.8	96.8	85.9	101.1	114
PaLWMG0202224500.01.P01	59	13	54	10	254	27.3	6.35	107.7	104.9	100.4	95.2	95	96.8	107.3	92.2	100.4
PaLWMG0604909000.01.P01	28	42	77	25	1699	192.6	5.4	105	139.3	95	108.5	108.1	110	102.1	63.4	68.5
PaLWMG0101277800.01.P01	40	27	71	27	781	85.6	7.59	101.5	98.3	107.5	95.8	95.7	96.3	92.2	102.1	110.6
PaLWMG0806600500.01.P01	55	24	79	24	422	45.3	6.44	103.3	107.4	105.1	92.8	91.9	93.5	92.6	98.8	114.6
PaLWMG0302610600.01.P01	62	26	86	26	535	59.1	6.55	116.5	99.8	101.1	100.1	98.8	98	127.8	73.6	84.3
PaLWMG0705908800.01.P01	89	13	66	13	169	18.1	4.84	76.2	77.2	94.8	97.9	99	101.9	105.9	131	116.1
PaLWMG0504311100.01.P01	60	18	79	18	340	37.1	5.58	91.6	91.2	102.1	100	98.9	99.6	92	113.4	111.2
PaLWMG0302496700.01.P03	53	10	54	2	200	22.9	8.4	99	131.8	82.3	109.1	118.3	124.3	106.8	58.3	70
PaLWMG0705988800.01.P03	54	6	47	4	122	12.5	4.54	76.2	87.5	97.2	104.8	96	92.5	68.8	147.7	129.2
PaLWMG0302833900.01.P01	53	21	65	20	476	51.1	5.81	103.4	103	97.9	114	113.4	114	91.1	78.7	84.5
PaLWMG0403588500.01.P05	46	31	85	30	625	70.2	8.78	91.4	94.1	98.1	94.7	94.2	94.6	80.6	131.5	120.7
PaLWMG0101420600.01.P01	33	45	82	45	1624	183	5.92	109.9	107.2	103.5	100.7	101.6	101.9	102.5	80.9	91.7
PaLWMG0705637700.01.P01	58	29	80	29	595	67	6.67	122.9	112.2	108.8	98.9	100.8	102.6	99.3	70.4	84
PaLWMG0605280700.01.P04	63	26	78	16	502	55.5	7.9	108.7	82.7	107.6	88.9	87.6	86.9	155.4	85.3	96.9
PaLWMG0604978400.01.P06	52	12	60	11	253	26.5	10.02	83	88	99.7	101.4	101.6	99.7	88	126.3	112.4
PaLWMG0806541700.01.P01	60	23	86	22	447	48.9	6.81	104.6	98.7	102.6	100	101	100.2	98.4	91.4	103.1
PaLWMG0100257300.01.P01	50	23	79	22	500	56.2	6.04	109.8	111.5	100.9	100.8	101.9	101.4	72.6	94.7	106.4
PaLWMG0101276000.01.P01	28	50	84	50	2086	231.9	6.43	111.1	118	103.2	102.1	105.9	103.2	112.1	67.8	76.6
PaLWMG0303248100.01.P01	42	34	69	17	951	106	6.07	107.5	115.7	101.1	94	107.6	98.4	104.6	76	95.1
PaLWMG0101255700.01.P01	66	13	70	1	215	23.6	9.74	87.8	87.2	98	101.8	100.2	101.2	90	127.2	106.7
PaLWMG0605519300.01.P01	61	24	76	22	362	39.8	5.87	107.9	103.8	100	95.4	98.3	100.2	91.3	98.3	104.7
PaLWMG0806725600.01.P01	57	22	61	22	490	54.5	5.06	108.3	112.2	106.5	101.4	103	103.4	85.3	84.6	95.3
PaLWMG0706367900.01.P02	67	11	41	1	291	30.7	6.7	101.3	96.6	92	118.2	88.4	103	87.7	110.5	102.3
PaLWMG0806381500.01.P01	59	9	51	1	181	20.7	6.95	99.9	123.5	88	115.6	122.4	126.9	96.9	54.7	72.1
PaLWMG0101441800.01.P01	41	15	67	5	420	47.8	6.24	113.6	121.8	97.7	111.6	108.7	109.8	103.4	63.6	69.9
PaLWMG0303114600.01.P01	59	23	79	23	470	52.1	5	97.6	98.7	100.5	94.6	95.6	97.7	114.4	96.8	104.1
PaLWMG0100658200.01.P01	43	18	62	18	441	47.8	6.81	105.1	99.7	101.7	97	98.1	99.7	92.4	98.6	107.6
PaLWMG0604804100.01.P04	29	9	55	5	416	44.1	9.09	95.5	87.8	102.1	95.7	98.1	99.7	105.2	106.8	109.1
PaLWMG0403788500.01.P01	70	13	52	13	237	26	4.82	92.4	89.3	105.6	100.8	99.3	99.6	91.8	116.3	105
PaLWMG0201495600.01.P01	35	26	86	2	740	84.4	6.06	96.3	69.3	97.9	78.3	104.4	101.1	135.2	126.7	90.8
PaLWMG0706293900.01.P01	67	12	43	2	291	30.7	6.7	118.4	113.1	120.7	113.4	110.8	114.6	64.3	74.6	70.2
PaLWMG0100259400.01.P01	22	9	44	6	546	59.5	4.98	81.4	89.7	94.7	88.2	86	87.7	82.8	161.8	127.6
PaLWMG0705877400.01.P01	57	20	59	20	464	48.7	7.17	101.1	110.2	111.5	99.6	100	99	50.4	113.9	114.2
PaLWMG0504312700.01.P01	40	15	62	14	429	45.7	5.21	91.6	91.6	99.5	106	107.2	104.9	88.3	113.6	97.3
PaLWMG0100219900.01.P01	57	19	82	12	245	28.3	9.95	98.9	91.5	101.6	103.9	103.5	105.1	91.3	110.3	93.9
PaLWMG0100239800.01.P02	41	26	78	26	633	71.7	6.51	105.1	94.8	102.3	98	97.2	96.9	108.2	94.9	102.6
PaLWMG0302502000.01.P01	66	21	68	6	322	34.4	5.59	102	99	105.6	110.2	112.1	115.6	72.4	87.2	95.9
PaLWMG0605217800.01.P02	47	31	66	31	746	82.5	4.78	84.6	85.4	95.1	108.4	104.9	102.4	108.6	108.3	102.4
PaLWMG0100628700.01.P01	52	17	47	17	336	37	9.36	81.8	84.4	89.4	107	102.7	100.6	76.4	140.8	117
PaLWMG0202412200.01.P01	52	10	55	2	178	20.2	11.08	100.3	90.2	102.4	102.2	102.1	100.6	95.3	107.5	99.4
PaLWMG0605613300.01.P01	43	27	66	27	722	83.3	5.17	115.1	103	100.7	101	102.6	101.5	134.2	67.6	74.3
PaLWMG0101040600.01.P01	55	38	78	37	769	84.3	7.8	100.5	91.5	104.8	92.2	94.2	94.2	118.7	99.2	104.7
PaLWMG0303725800.01.P01	49	11	50	9	385	41	4.7	90.1	86.1	100.4	101.8	101.3	102.5	88.1	120.5	109.3
PaLWMG0605146200.01.P01	59	29	62	29	562	60.6	6.71	115.7	92.5	102	91.4	92.6	91.9	154.8	74.7	84.5
PaLWMG0101473700.01.P01	33	15	78	1	384	41.9	9.76	120.5	102.1	92.9	94.7	88.2	86.8	150	72.8	92
PaLWMG0101190100.01.P01	29	11	61	11	367	40.1	6.28	99.4	143	107.8	90.6	94.5	98.3	57.7	98.5	110.3
PaLWMG0303017400.01.P01	51	13	66	10	261	29.4	4.83	110.3	108	102.3	98.6	100	99.5	94.9	89	97.5
PaLWMG0180000123.01.P01	54	9	100	4	156	17.7	9.79	82.7	74.2	89.7	115.7	109.8	111.2	140.9	99.1	76.7
PaLWMG0504134100.01.P01	58	12	67	8	224	24.1	4.67	100.1	83.6	105.6	102.1	100.9	104	116.9	96	90.8
PaLWMG0101311100.01.P01	53	32	71	32	619	67.4	5.92	110.5	106.3	107.8	93.1	95.8	93.9	96.2	90.5	106
PaLWMG0706242700.01.P01	67	16	50	16	249	27.4	6.09	103.9	89	104.3	94.1	93.3	95	117.8	100.6	102.1
PaLWMG0100678200.01.P01	36	11	50	11	376	40.1	5.63	97.1	102.5	100.9	92	100.8	106.6	92	96.7	111.4
PaLWMG0605015500.01.P01	49	38	67	10	809	88.8	6.25	114	90.6	98.3	96.5	99.9	100.8	140.2	72.3	87.3
PaLWMG0605027300.01.P01	35	18	47	16	707	77.1	6.99	93.2	114.8	101	91.6	91.8	94.3	54.8	134.2	124.3
PaLWMG0706051500.01.P01	65	13	66	1	211	23.4	9.74	90.8	97	104.7	110.3	116.5	107	121.2	68.1	84.5
PaLWMG0302466200.01.P01	31	8	67	1	344	37.5	6.89	120.7	104.1	104.1	92.6	99.2	118.2	94	78.3	88.8
PaLWMG0504131500.01.P01	52	25	61	25	617	67.5	7.36	115.9	101	107.3	92.9	91.1	90.9	138.2	75.3	87.4
PaLWMG0504276500.01.P01	83	14	55	2	202	22.6	5.71	94	109	86.8	112.9	112.6	118.2	85.9	86.8	93.9
PaLWMG0201512700.01.P01	33	15	77	1	384	41.8	9.76	129.5	134.7	114.6	140.2	119	126.5	25.8	48.4	61.4
PaLWMG0605203200.01.P01	60	20	80	20	240	27.9	9.11	86.1	86.8	92.4	103.4	100.6	99.3	63	147.5	121
PaLWMG0504673200.01.P01	47	19	74	1	399	45.9	9.32	163.5	99.4	148.9	84.3	99.1	85.7	39.9	92.9	86.2
PaLWMG0302702400.01.P01	46	23	61	19	674	76.5	6.04	111.3	91	105	100.7	100.2	99.8	124.8	74.7	92.4
PaLWMG0203256100.01.P01	83	14	55	1	202	22.6	5.71	91.6	111.8	82	98.9	118.7	117.7	104.3	81.9	93.2
PaLWMG0705712400.01.P01	54	22	67	21	417	47.1	8.6	113.1	98.1	104.6	93.4	96	95.3	120.4	81.5	97.7
PaLWMG0605381600.01.P01	51	14	61	14	330	35.8	9.07	98.2	92.6	100.3	97.3	99.7	100.7	90.3	113.7	107.2
PaLWMG0605561800.01.P04	44	6	52	5	179	18.6	6.42	85.9	91.8	99.6	100	100.1	99	69.4	147.9	106.4
PaLWMG0101442000.01.P01	51	11	59	1	237	27.3	5.68	125.4	119	89.9	106.9	105.4	103.7	123.4	58.5	67.8
PaLWMG0604871300.01.P01	70	18	44	18	271	30.5	6.21	86.3	89.5	98.4	98	98.2	99.6	96.6	120.3	113
PaLWMG0302741600.01.P01	37	31	73	31	866	97.1	5.35	100.2	100.2	102.7	97.2	96.6	98.2	82.5	106.8	115.6
PaLWMG0100044200.01.P01	50	13	48	11	298	34	9.42	99.8	92.4	95.6	103.6	105.3	104.3	97.5	102.9	98.6
PaLWMG0605253800.01.P01	64	16	76	8	253	28.4	4.91	102.8	91.1	100.5	98.7	97.1	98.3	96.7	106.8	108.1
PaLWMG0705797700.01.P01	31	17	53	17	763	81.4	8.09	100	99.1	92.9	107.9	108.3	109	102.2	88.4	92.1
PaLWMG0604776200.01.P01	57	15	70	15	298	31.9	9.44	109.2	111.8	96.9	99	102.9	107.5	115.2	75.1	82.3
PaLWMG0504610200.01.P01	42	32	55	29	909	101.3	6.04	104.9	96	103.6	93.7	94.9	91.1	119.2	92.5	104.1
PaLWMG0705950500.01.P01	74	22	77	16	390	42.8	6.54	102.9	125.3	96.9	92.9	95.1	98.5	49	112.8	126.6
PaLWMG0202313100.01.P01	47	19	74	1	399	45.8	9.32	108.6	85.2	106.8	82.7	93.9	84.1	143.8	98.2	96.8
PaLWMG0504272100.01.P01	51	22	67	22	487	53	6.49	115.5	93	104.8	95	95.4	94.1	134.8	77.7	89.6
PaLWMG0706283900.01.P01	33	13	72	1	449	49.4	5.08	112.2	123.3	104.3	97	91.7	99.9	75.5	100.8	95.2
PaLWMG0504141100.01.P01	58	17	51	12	318	33.8	5.22	118.3	98.1	103.9	106.6	105	102.7	114.9	72.3	78.3
PaLWMG0100035001.01.P01	55	7	61	1	152	17.2	10.43	92.5	97.6	97.5	104.8	108.3	111	85.3	101.6	101.4
PaLWMG0202388500.01.P03	31	49	74	49	1846	203	6.51	112.9	111.6	101.3	108	105.2	104.6	101.5	73.5	81.5
PaLWMG0403763900.01.P03	46	14	84	4	305	34.7	10.08	96.8	82.4	89.3	105.2	114.9	112.5	118.3	89.6	90.9
PaLWMG0100239400.01.P02	43	28	67	14	721	78.7	5.81	97.2	177.4	112.7	105.2	107.4	106.4	47	71.4	75.5
PaLWMG0705734000.01.P01	79	11	49	11	162	17.4	5.87	102.9	95.1	109.1	99.8	98.8	99.1	93.9	103.4	98
PaLWMG0403714400.01.P01	40	14	52	11	393	42.2	6.99	94.7	81.4	103.1	95.7	95.3	97.3	123	102.8	106.8
PaLWMG0101324700.01.P02	19	56	80	56	3482	381.5	5.36	102.3	101.3	104.9	95.5	96.1	95.2	104.7	96.4	103.7
PaLWMG0403702100.01.P01	68	36	79	36	556	60.3	6.58	121.5	93.3	108	91.8	92.2	89.9	143.5	74.9	85
PaLWMG0100125600.01.P02	56	14	60	11	325	34.5	6.27	102.4	116.9	98.9	109.1	111.4	112.4	90.9	71.4	86.6
PaLWMG0101310600.01.P01	74	19	70	11	251	28.2	4.87	103	88.5	104.4	99.4	101.4	99.1	115.9	93.6	94.7
PaLWMG0201799400.01.P02	53	15	67	15	273	29.9	10.26	100.4	77.5	92	103.7	103.9	107.8	139.7	93	82
PaLWMG0504724300.01.P01	57	18	53	18	327	36.2	7.2	114.7	107.1	87.3	99.4	101.3	99.6	162.8	64.4	63.4
PaLWMG0706301100.01.P01	38	20	66	10	510	55.1	7.56	115.8	111.2	100.9	101.8	105.1	104.9	106.1	76.4	77.8
PaLWMG0605058300.01.P01	53	7	41	7	223	23	6.7	78.9	90.9	98.2	99.8	102.6	99.5	88.3	138.7	103.1
PaLWMG0605001100.01.P01	51	8	73	8	175	18.9	8.7	102.5	98.4	99	98.5	100.5	100.2	92.7	104.5	103.8
PaLWMG0605585600.01.P01	55	7	58	1	152	17.2	10.43	75.7	81.4	87.5	104.3	106.2	99.3	85.5	138.5	121.6
PaLWMG0605180800.01.P01	63	23	80	22	359	39.1	7.49	109.8	126.2	108.9	101.3	101.6	103.3	68.3	83.2	97.5
PaLWMG0101336800.01.P02	56	23	54	13	520	57.3	7.88	103.6	109.8	101.2	91.3	91.1	92.1	86.3	107.9	116.8
PaLWMG0605565000.01.P01	58	22	50	22	403	44.6	9.32	110.3	82.9	99.2	102.5	101.5	100	131.5	83.1	88.9
PaLWMG0807074600.01.P01	56	26	81	15	389	44.3	10.14	108.6	88.2	75.4	110.6	111.6	111.5	171	57.9	65.2
PaLWMG0806749400.01.P01	40	14	52	14	369	40.2	4.82	90.7	103.1	98.8	96.4	98.5	96.4	65.6	129.3	121.2
PaLWMG0504456800.01.P01	35	15	61	14	445	50.8	4.69	98.5	98.8	95.5	102.6	104.1	105.2	88.6	101.4	105.4
PaLWMG0100586500.01.P02	52	11	58	5	256	28	4.96	105.9	95.2	105.5	101.5	100.6	101.1	97.9	98.6	93.5
PaLWMG0504717800.01.P01	50	25	57	25	535	57.7	7.46	120.3	99.3	100.1	96	96.3	95	138.8	71.7	82.4
PaLWMG0403436000.01.P01	30	13	69	4	389	42.3	9.67	95.9	206.5	86.2	121.4	114.2	121.4	34.9	56.6	62.9
PaLWMG0100960100.01.P01	72	26	125	26	250	28.8	5.3	88.2	109.1	104.8	98.2	97.4	100	54.6	128.4	119.2
PaLWMG0302873300.01.P01	34	15	74	6	379	40.7	9.86	111	120.7	96.8	106.4	109.8	102.5	112.9	68.6	71.3
PaLWMG0405828100.01.P01	23	5	39	4	251	27.2	9.41	74.7	98.8	100.5	97.2	95.3	97.8	53.2	160.4	122
PaLWMG0303011900.01.P01	32	16	63	16	588	63.4	6.62	119.4	85.3	101.4	92.5	92	91.9	168.2	67.4	81.9
PaLWMG0403941200.01.P01	50	12	42	12	214	23.2	8.56	95.8	120.7	102	107.3	104.6	104.8	38.6	115.3	110.9
PaLWMG0607107900.01.P03	43	22	94	3	552	62.1	9	100.2	148.2	71.5	83.9	116.8	105.3	37.2	114.3	122.7
PaLWMG0709140900.01.P01	39	11	52	5	343	37.4	9.32	86.6	86.5	104.6	132.4	131.4	139.4	58	84.3	76.9
PaLWMG0201708700.01.P01	50	6	43	3	202	22.1	4.58	94	89.1	102.7	102.8	103	103.8	80.2	121.2	103.1
PaLWMG0303029200.01.P01	51	23	49	4	541	58.4	5.48	126.9	106	96.8	100.6	95.2	90.2	149.6	60.7	74
PaLWMG0101153501.01.P01	45	16	50	15	393	42.7	8.03	109.4	105.7	106.5	99.1	98	96.3	90	90.8	104.2
PaLWMG0604767300.01.P01	34	20	92	1	645	72.7	8.97	89.5	113.9	80.2	92.3	90.9	94	71.2	131.9	136.2
PaLWMG0605138600.01.P02	36	17	62	16	630	68.3	8.63	80.3	84.6	95.6	103.1	100.3	102.6	90.5	122.5	120.5
PaLWMG0806745000.01.P01	19	3	37	3	258	27.9	4.98	91.1	98.1	101.5	95	96.5	97.4	78.1	123.7	118.6
PaLWMG0302688300.01.P01	50	18	51	18	438	47.9	5.72	98.4	97.6	96.6	96.4	97.4	98.9	87.1	115.9	111.7
PaLWMG0607219200.01.P01	33	23	41	16	878	94.8	5.21	108.5	100.6	108.9	91.9	91.1	90.2	111.8	90.5	106.5
PaLWMG0605538000.01.P02	41	33	71	17	916	104.3	6.07	108.5	114.9	101.8	105.4	102.3	104.6	75.1	88.4	98.9
PaLWMG0406037500.01.P01	68	23	85	12	376	42.5	6.34	110.4	95	93.3	96.7	99.3	98.9	119.1	88.5	98.9
PaLWMG0201810000.01.P01	57	20	64	20	450	48.6	6.07	80.4	88.8	96.9	106.2	102.9	103.4	97	119.6	104.8
PaLWMG0705806400.01.P01	42	33	78	29	806	92.5	6.37	123.1	113.3	112.4	101.6	101	102.9	77.3	77	91.2
PaLWMG0705638200.01.P01	52	20	68	13	444	49.9	5.85	113.3	101.6	105.9	97.5	96.8	98.7	116.7	79.5	90.1
PaLWMG0403731100.01.P01	49	18	78	15	428	45.3	8.25	103.3	99.5	94.6	104	105.2	130.8	98.6	76.3	87.6
PaLWMG0304277900.01.P04	53	24	49	5	541	58.4	5.48	117.5	104.8	96.5	96.8	97.1	98.7	148.4	68.2	72
PaLWMG0302823100.01.P01	49	7	45	3	158	17.8	7.42	83.9	81.9	108.8	103.3	101.8	104.6	61.5	131.6	122.5
PaLWMG0202208500.01.P01	44	9	78	2	154	17.5	10.24	94	85.6	96.5	112.4	114.2	111.7	93.9	100.8	90.9
PaLWMG0504309300.01.P01	42	23	60	22	581	65.2	6.24	95.7	135	84.9	96.8	100.5	102.8	50.3	113.6	120.4
PaLWMG0403716300.01.P01	67	15	48	5	235	25.7	5.99	89.7	86.1	101.9	96.1	96.4	98	85.2	125.5	121.1
PaLWMG0100864200.01.P09	49	14	43	12	385	40.8	4.74	89.4	94.9	100.7	101.4	99.8	100.6	81.3	123.2	108.7
PaLWMG0605523000.01.P02	39	36	70	36	868	100.5	8.6	131.1	102.3	93.8	102.8	100.7	99.7	129.3	66.7	73.7
PaLWMG0504471200.01.P01	44	16	46	16	475	50.8	7.53	111.6	84.1	106.8	88.8	87.6	87.7	157.2	80.6	95.6
PaLWMG0100330700.01.P01	85	12	38	7	160	17.4	5.25	81	94.9	91.7	93.9	97.1	99.4	57.6	153	131.4
PaLWMG0100325700.01.P01	40	17	43	11	529	58.3	5.21	104.6	90.9	106.6	98	96.5	91.4	124.8	89.6	97.6
PaLWMG0604824600.01.P02	34	25	46	25	864	96.4	6.44	98.9	120.5	109.5	96.7	96.7	98.9	63.3	109.4	106
PaLWMG0202160700.01.P01	40	17	55	16	505	56.4	5.87	91.4	102	91.8	89.3	90.4	91.3	87.4	127.2	129.1
PaLWMG0604987000.01.P01	42	8	77	1	159	18	10.1	98.4	88.4	101.9	108.9	101.5	100.6	97.6	108.4	94.2
PaLWMG0201940000.01.P01	55	8	66	8	148	16.5	6.95	82.5	84.1	97.3	100.8	104.1	104.2	83.7	128.9	114.3
PaLWMG0202346800.01.P01	72	11	56	11	205	22.3	4.56	87.4	95.8	98.3	95.7	94.9	98	70.9	136.4	122.6
PaLWMG0100813800.01.P01	49	16	49	8	407	44.3	7.03	115.9	110.6	99.8	103.3	106	106.9	116	65.4	76.1
PaLWMG0100978500.01.P01	68	11	58	3	250	27.5	4.94	95.7	105.6	100.4	97	101	98.5	86.2	106.4	109.3
PaLWMG0607279400.01.P02	47	10	72	4	202	23.2	10.11	98.7	83.5	91	110.7	110.8	109.5	140.5	79.9	75.4
PaLWMG0101111500.01.P01	39	13	45	12	373	41.8	6.95	102.1	87.4	110.4	96.1	93.2	91.2	128	87.9	103.7
PaLWMG0303246400.01.P01	48	9	51	2	145	16.9	9.07	97.4	94.4	100.7	104.3	106.7	103.9	101	105.3	86.3
PaLWMG0810769800.01.P01	61	20	75	7	379	41.1	6.33	116.5	128.7	95.7	104.2	115.9	122.4	83.7	56.8	76
PaLWMG0100740200.01.P01	38	24	43	23	766	86.1	6.61	122.2	131.6	108.4	96.3	94.9	95.1	78.4	74.2	99.1
PaLWMG0302783300.01.P01	56	35	79	29	669	75.4	7.84	113.9	95.4	101.7	95.8	97.3	97.1	117.1	86.6	95.1
PaLWMG0605415500.01.P01	60	31	63	31	491	54.6	5.99	95.9	90.7	101.5	91	89	89	93.6	117.6	131.7
PaLWMG0504563600.01.P01	57	25	64	25	554	61.7	6.89	105.7	118.7	96.3	102.1	104.6	104.8	84	82	101.6
PaLWMG0100544200.01.P01	46	10	55	10	319	34.1	5.45	103.2	85.5	104	100	101.2	103.4	120.2	88	94.6
PaLWMG0806760100.01.P01	59	7	41	7	161	17.2	8.62	86.7	87	115.3	97.9	93.7	97.3	65.2	147.4	109.3
PaLWMG0100862900.01.P01	28	8	44	5	359	36.7	9.07	105.2	100.9	98.1	99.2	104	102.7	128.2	76.5	85.1
PaLWMG0705759600.01.P01	58	11	61	8	150	16.7	11.22	84.8	90.7	96	105.1	105.5	106.6	85.2	123.6	102.5
PaLWMG0605236600.01.P01	68	24	67	23	316	35.9	6.64	104.9	114	101.6	97	98.5	100.3	76.5	103.7	103.5
PaLWMG0202353200.01.P01	42	24	50	24	655	71.5	6.89	117.2	119.3	105.4	99.3	100.9	101.2	104.7	69.5	82.5
PaLWMG0302815600.01.P01	51	5	34	5	154	16.7	4.5	113.2	130.6	97.8	104.5	106.3	106.9	104.6	61.7	74.4
PaLWMG0101078700.01.P03	26	14	44	13	687	70.6	6.27	76.5	76.2	90.2	120.7	115.4	112.6	124.6	98.3	85.7
PaLWMG0504484700.01.P01	44	22	45	22	553	61.9	8.57	115.1	77.5	109.3	95.1	94.3	91.4	155.4	72	89.8
PaLWMG0202198800.01.P01	58	11	50	4	216	23.2	5.4	105.6	105.3	105.8	102.1	109	105	75.6	97.6	93.9
PaLWMG0605496400.01.P01	38	12	53	2	390	42.9	6.21	113	108.1	106.7	95	96.6	101.3	78.5	94.7	106
PaLWMG0403913800.01.P02	63	18	82	13	261	29.6	4.88	103.3	90.9	102	103.2	100.8	101.5	112.5	94.9	90.8
PaLWMG0304162200.01.P01	42	33	67	33	892	98.1	5.22	112.3	104.6	97.4	96.8	98.3	99.9	123.5	79.9	87.3
PaLWMG0605243900.01.P01	46	14	47	10	372	41.5	8.18	110.9	74.7	106.1	97.2	99.5	100.4	122.8	87.2	101.1
PaLWMG0101109200.01.P01	45	17	42	17	472	51.8	5.26	95.5	111.1	110.9	101.1	100.9	101.4	58.3	119.1	101.8
PaLWMG0403913600.01.P01	64	9	38	9	168	18.2	4.7	89.3	123.5	67.5	93.1	94.2	94.5	44.6	152.2	141
PaLWMG0806936000.01.P01	33	13	62	2	469	48.9	6.99	81.5	121.5	69.8	85	85.9	90.3	53.7	168.8	143.5
PaLWMG0304526600.01.P01	69	6	42	6	157	17.2	10.07	88.3	113.6	64.3	81.4	83.8	82.8	43.3	187.2	155.3
PaLWMG0806731300.01.P01	45	21	48	13	490	56	8.79	113.5	104	98.6	97.9	98.1	98.8	117.3	80.8	90.9
PaLWMG0101291400.01.P01	38	16	57	16	483	53.6	5.24	97.5	81.8	94.7	111	105.6	104.5	177.5	64.1	63.2
PaLWMG0605257000.01.P01	34	40	62	40	1290	142.6	6.58	106	93.5	108.9	93.3	92.3	92.3	113	91.2	109.6
PaLWMG0403680200.01.P01	47	14	44	10	369	40.6	9	130.6	89.4	93	97.3	96.1	97.5	167.3	62.2	66.4
PaLWMG0504175700.01.P01	46	28	65	27	600	68.7	8.46	110.6	140.4	106.9	101.7	102	103.9	66.4	72.9	95.1
PaLWMG0706233000.01.P02	52	13	44	3	236	25.6	5.99	86.2	82.5	105.2	90.3	91.5	90.2	82.7	144.6	126.8
PaLWMG0303217300.01.P01	62	25	80	25	425	47.5	6.8	100.3	95.4	106.1	96.8	95.5	95	112.9	93.7	104.3
PaLWMG0403770800.01.P01	78	16	45	13	250	27.3	7.09	98.7	96.7	102.6	99.1	96.1	96.4	100.9	101.5	107.9
PaLWMG0504140100.01.P02	34	24	46	12	917	100.4	6.86	113.1	98.2	103.7	92.4	95.3	93.8	122.7	84	96.7
PaLWMG0605075000.01.P01	84	10	41	10	126	14.1	5	95.3	88.5	101.8	120	117.6	117.7	89.3	88.3	81.4
PaLWMG0302672800.01.P01	38	17	56	15	476	51.7	8.91	105.2	121.4	103.7	99.9	104.7	105.8	67.5	86.9	104.9
PaLWMG0604770600.01.P01	51	21	49	19	495	53.6	8.03	110.4	131.4	101.9	102.1	110.4	100.7	77.8	74.7	90.5
PaLWMG0100541800.01.P02	38	7	52	2	222	24.9	10.54	102.7	88	89.3	120	119.1	112.3	124.8	71.8	72.1
PaLWMG0403715100.01.P01	45	7	94	2	154	17.2	6.06	92.2	84.9	95.6	105.4	98.6	102.3	106.8	110.2	103.8
PaLWMG0405802600.01.P01	24	8	51	2	340	35.5	8.46	91	122.6	74.5	96.1	101.4	99.4	82.9	105	127
PaLWMG0807015800.01.P01	44	14	46	11	467	49	8	112.4	97.3	103.7	96.4	99.2	100	114.6	81.4	95
PaLWMG0201850200.01.P02	58	18	48	18	335	35.9	8.07	92.2	88.6	103	100.3	101	100.2	95.8	112	107
PaLWMG0303102100.01.P01	22	16	53	3	677	72.5	6.35	129.1	146.5	83.8	110.5	117.9	117.2	45.9	62.2	86.9
PaLWMG0100014900.01.P01	36	17	48	17	585	64.1	6.01	113.7	109.9	98.2	102.5	102.5	100.3	115.7	71.7	85.6
PaLWMG0201902700.01.P02	33	34	54	34	1158	127.6	6.76	100	96.4	102.5	94.7	92.9	92.5	106.9	104.6	109.5
PaLWMG0806502600.01.P01	54	6	45	3	124	13.9	9.55	86.5	83.4	90.7	109.6	111.8	108.9	144	89.4	75.6
PaLWMG0101035300.01.P02	40	41	69	41	929	100.4	5.47	81.6	86.2	96.5	99	95.7	94.2	98.5	130.1	118.2
PaLWMG0605429500.01.P01	38	12	48	9	309	33.1	6.65	107.9	89.9	112.2	96.2	94.9	93.4	100	96.6	109
PaLWMG0605520900.01.P02	38	11	39	4	454	49.2	4.82	98.2	93.8	100.7	92.1	93.6	91.6	130.4	107.5	92.1
PaLWMG0202169600.01.P01	42	11	45	11	341	37.6	5.35	110.3	104.8	101.8	100.8	99.9	102.7	119.1	75.8	84.8
PaLWMG0201993700.01.P01	55	7	45	4	124	14	9.55	83	84	90.4	107	107.2	105.1	103.9	120.4	99
PaLWMG0201898900.01.P02	49	19	43	19	449	51.4	7.96	111.1	95	101.1	96.6	94.7	94	125	85.9	96.5
PaLWMG0403963300.01.P01	42	24	47	13	588	65	6.43	115.4	140.9	119.6	98.1	98.9	103	51.6	83.8	88.7
PaLWMG0100960900.01.P05	34	18	37	18	885	92	6.61	91	94.7	99.4	100.6	96.6	97.7	81.4	123.6	115
PaLWMG0604848900.01.P02	34	19	36	12	855	92.4	5.22	98.3	93.9	95.2	95.7	94.2	93.2	160.4	87.2	81.9
PaLWMG0807147600.01.P02	35	25	47	13	917	100.4	7.27	118.6	90.9	104.2	95.6	93.1	89	126.7	86.1	95.8
PaLWMG0705888100.01.P01	60	28	71	28	498	52.9	6.34	80.5	114.2	65.3	80.8	82.4	80.8	52.5	186	157.6
PaLWMG0302764500.01.P02	26	4	38	4	170	18.4	5.54	78.4	78.3	95.7	103.3	104.3	106.2	89.5	135.2	109.1
PaLWMG0101012900.01.P06	38	21	50	21	587	65	7.5	105.2	105.9	102.9	96.1	97.5	98.7	84.3	99.4	110
PaLWMG0706108500.01.P01	46	19	39	19	544	59.1	5.5	100.9	130	103.3	103.9	105.7	107.4	81.7	83.3	83.6
PaLWMG0806893000.01.P01	50	20	59	19	399	44.6	8.19	98.9	91	97.8	100.1	99.2	98.8	114	96.9	103.3
PaLWMG0201489900.01.P01	39	14	41	14	473	52.6	7.01	102.7	115.8	96.3	98.3	100	104.7	69.5	99.7	112.9
PaLWMG0403933900.01.P01	35	36	55	36	1067	120.7	7.17	112.1	89.4	104.6	92.9	93.4	90.7	139.7	83.3	93.9
PaLWMG0605464300.01.P01	34	5	47	4	165	17.6	9.04	75.1	99.7	92.5	94.6	81.1	97.2	50.5	185.3	124
PaLWMG0605533100.01.P04	13	11	56	6	663	73.2	5.39	112	107.8	98.2	98.7	105.7	106.3	101.6	77.2	92.4
PaLWMG0604915100.01.P01	51	10	47	8	204	21.9	9.26	92	94	101.2	97.4	96.3	97.1	79.1	128.6	114.3
PaLWMG0705707400.01.P01	65	10	39	10	170	18.6	8.07	87.7	94.3	97.1	95.8	96.1	100.2	75.8	128	125.1
PaLWMG0201523200.01.P01	58	14	53	14	291	31.4	8.98	95.3	99.4	104	104.1	106.3	107.1	88.6	100.9	94.3
PaLWMG0604952500.01.P01	42	26	43	26	811	88.7	8.63	113.9	98.1	102	92.1	94.5	91.3	145.5	78.6	83.8
PaLWMG0100420800.01.P01	39	13	45	10	403	44.8	6.43	94.5	118.7	105.6	103.1	106.9	106.9	63.4	96.3	104.7
PaLWMG0100066800.01.P01	38	18	57	18	509	55.2	7.46	113.1	94.6	106	92.9	92.9	91.9	136.3	82.6	89.7
PaLWMG0203396900.01.P01	45	6	90	1	128	14.7	9.92
PaLWMG0806755000.01.P01	46	16	45	11	462	50.3	6.55	105.1	91.1	94.2	103.9	107.6	98.7	148.9	72.9	77.6
PaLWMG0504277000.01.P01	68	26	70	22	360	38.8	7.27	93.2	87.8	87.6	107.9	109.7	110.9	70.3	126.4	106.2
PaLWMG0403395300.01.P01	46	19	58	13	533	58.3	7.02	109.2	110.8	102.1	101.8	102.5	101.4	107.7	79.6	84.9
PaLWMG0605024100.01.P01	52	3	21	3	87	8.7	11.31	82.5	93.9	96.7	97.5	96.5	99.8	67.9	148.1	117.1
PaLWMG0705660200.01.P02	39	16	39	16	543	58.4	8.07	111.9	83	95.9	91.3	92.9	89.6	196.8	62.4	76.1
PaLWMG0302832400.01.P01	37	14	39	14	412	44.7	8.37	103.8	86.8	105.6	95.5	98.3	98.5	95.9	102.4	113.1
PaLWMG0302721300.01.P01	51	20	47	20	524	57.2	7.88	106.5	137.3	96.9	102.8	104.3	104.2	94	72.7	81.2
PaLWMG0504632400.01.P01	42	17	33	1	488	52.1	6.23	118.1	116.2	128.5	120.3	126.6	116.8	47	68.2	58.4
PaLWMG0504502000.01.P01	35	21	46	21	705	77.8	5.17	112.3	97.6	110	95.2	96.7	93.5	112	86.2	96.6
PaLWMG0100329300.01.P01	69	8	28	2	160	17.3	5.11	88.3	114.2	100.3	91.3	92.7	89.8	53.7	140.7	129.1
PaLWMG0605218900.01.P01	22	38	52	38	2227	238.4	5.66	110.5	110	105.5	99.5	101.8	99.2	103.7	83.1	86.7
PaLWMG0100281000.01.P01	25	29	39	21	1554	170.6	7.03	103.1	94.9	103.2	96.5	94.3	92.5	126	95.9	93.6
PaLWMG0504540200.01.P01	48	25	57	19	538	58.5	7.17	115.5	105.4	107.8	95.7	96.9	98.3	92.9	88	99.4
PaLWMG0100686800.01.P01	41	4	28	4	123	13.6	6.11	85.8	92.7	100.8	98.4	97.4	99.9	74.8	138.1	112.2
PaLWMG0605029700.01.P02	41	28	55	28	740	82	6.71	105.7	109.2	105.9	97.9	96.8	97.5	116.7	79.8	90.6
PaLWMG0504351900.01.P01	56	13	38	10	299	33.4	6.57	98.8	91	95.5	94.2	91.8	94.1	139.8	97.9	96.8
PaLWMG0705812400.01.P01	31	38	56	37	1438	159.5	5.45	104.3	105.3	106.5	96.3	94	93.1	101.2	96.3	103
PaLWMG0100170500.01.P02	66	11	42	11	233	24.9	5.95	102.5	115.7	105.6	91.5	95.5	93.8	72.2	103	120.2
PaLWMG0100388200.01.P01	52	25	46	23	539	59	4.83	101.1	86.1	111.7	95.5	92	90.9	120.3	98.9	103.6
PaLWMG0303218200.01.P01	32	17	48	11	563	62.5	7.28	98.2	115	98.1	100.5	104.6	102.7	99.7	89.3	92
PaLWMG0202199200.01.P01	49	9	37	2	216	23.2	5.67	106.3	121.7	104.6	107.9	112.8	109.8	63	84.2	89.8
PaLWMG0504181600.01.P01	46	15	53	15	413	45.8	6.44	99.2	84.5	102.3	102.6	101	101.9	117.8	95.2	95.6
PaLWMG0202181600.01.P01	78	19	59	19	168	19.7	5.3	80.2	90.6	89	99.3	98.6	100.1	66.4	155.6	120.1
PaLWMG0605262300.01.P01	53	18	51	9	443	49.5	5.76	92.6	136.6	80.2	98.1	100.7	102.4	53.1	108.8	127.4
PaLWMG0705644500.01.P01	36	23	48	23	743	84	6	96.1	100.4	97.9	95.3	93.5	100.2	95.1	105.7	115.9
PaLWMG0202180400.01.P01	55	19	81	2	361	39.8	7.94	108.3	155.8	103	100.1	103.4	111.3	65.2	65.5	87.4
PaLWMG0202216000.01.P01	66	19	47	10	342	38.5	7.52	96.2	96.3	100.1	100.3	99.4	95.6	80.6	119.5	111.9
PaLWMG0302557500.01.P01	38	27	45	21	840	95.2	5.08	118.3	113.2	112.7	98.3	98.3	100	87.8	78.6	92.9
PaLWMG0706031200.01.P01	49	11	56	7	164	18.7	10.37	90.8	83.4	91.1	109.8	109.8	111.3	104.4	101.7	97.6
PaLWMG0303091600.01.P02	35	5	33	3	156	17.6	5.05	85.6	80.5	96.3	107.4	103.1	104.3	82.5	132.1	108.2
PaLWMG0705816500.01.P01	57	15	33	15	385	40.7	8.47	106.5	105.2	103.2	103.6	104.9	102.8	88.8	90.7	94.3
PaLWMG0504687600.01.P01	42	17	31	1	488	52.1	6.16	106.6	112.2	89.8	74	86.5	76	146.2	118.4	90.4
PaLWMG0807177100.01.P02	28	32	38	32	1381	152	5.33	99.1	101.6	98	99.5	99.7	97.9	86.1	110.8	107.4
PaLWMG0100730400.01.P01	58	8	45	3	146	16.3	10.52	98.6	67.2	80.1	114.9	110.4	108.6	183.6	70.2	66.3
PaLWMG0806667700.01.P01	24	23	39	23	1233	131.7	6.89	100.2	102.8	97.7	98	98.6	99	120.8	88.8	94.1
PaLWMG0100020000.01.P01	27	17	33	17	829	90.4	6.6	119.4	120.6	108.1	101.5	104.5	106.2	81.2	71.8	86.8
PaLWMG0101125200.01.P01	54	12	45	12	243	26.9	6.8	88.9	94.2	99	97.4	95.7	96.5	75	132.5	120.7
PaLWMG0504426400.01.P01	33	23	42	18	872	96.2	4.72	109.7	99.2	109.8	94.5	94.2	92.7	121.8	81.1	96.9
PaLWMG0201569900.01.P01	27	23	48	23	947	101.6	4.93	113.8	115.1	105.3	100.6	100.2	98.1	115.9	71.6	79.2
PaLWMG0201500600.01.P01	22	23	38	23	1076	117.3	6.27	111.5	95.1	106.8	94.5	92.5	91.4	118.7	91	98.6
PaLWMG0705778600.01.P01	45	13	48	12	374	42.8	4.45	91.8	89.9	96.8	100.2	99.8	102.4	83.9	125.9	109.1
PaLWMG0202211100.01.P02	33	28	54	28	904	102.6	6.67	110.1	122.9	107.2	101.7	103.3	98	90.1	75.6	91.2
PaLWMG0202313500.01.P01	23	12	45	1	632	70	4.98	105.1	115.6	100.2	90.6	77.8	88	56.1	144.6	122
PaLWMG0100600700.01.P01	39	10	42	10	308	35.1	6.16	107.7	132	98.2	111.7	108.9	110	88.5	68.3	74.8
PaLWMG0101124400.01.P02	44	19	40	16	587	65.6	5.1	103	95.2	103.4	95.9	96.6	97.4	121.6	85.8	101.2
PaLWMG0604870500.01.P02	60	21	58	20	420	47.1	5.59	96.5	92.3	103.4	98.8	98.7	99.5	101.5	100.5	108.9
PaLWMG0403943400.01.P01	28	10	35	10	461	51.8	5.85	101.9	91.9	98	103.3	103.7	102.4	122	88.4	88.4
PaLWMG0807147700.01.P01	35	29	52	29	875	95.8	6.38	116.3	101.7	110.1	92.2	93.3	91.4	120.1	79.6	95.3
PaLWMG0604883200.01.P01	29	18	37	17	714	78.4	5.19	117.9	92.7	109.5	91.4	90.1	88.7	149.1	74.3	86.3
PaLWMG0605487800.01.P01	38	20	44	20	589	64.2	9	108.6	74.1	98.7	88	87.8	86.6	185.9	79.1	91.2
PaLWMG0706163600.01.P01	32	27	51	27	1096	120.6	7.46	109.2	98.6	96.4	94.1	96.5	92.9	156.3	74.4	81.5
PaLWMG0604770800.01.P01	48	26	46	26	633	71.6	4.98	85	94.6	96.8	96.5	93.9	94.8	73	141.7	123.5
PaLWMG0100914100.01.P01	56	16	34	16	380	41.5	7.52	111.5	88.8	104	94.9	94.9	94.5	129.7	87.2	94.6
PaLWMG0605235500.01.P01	69	17	36	15	300	32.2	9.13	82.8	96.5	100.7	101.9	99.8	101	82.7	124.7	110
PaLWMG0605603800.01.P03	24	31	47	21	1500	165.6	7.5	115.7	106.4	105.4	96.2	96.7	93.8	119.3	78.1	88.4
PaLWMG0504672800.01.P01	23	12	46	1	632	69.9	5.02	80.6	82.1	82.1	102	88.5	97.7	189.3	90.9	86.8
PaLWMG0810922000.01.P01	36	13	50	1	379	41.1	6.38	133.5	186.3	110.4	114	115.6	109.5	49.9	44.9	35.9
PaLWMG0806842900.01.P01	68	15	47	15	245	26.9	9.04	101.9	85.2	87.9	113.4	111.5	110.3	136.4	75.1	78.3
PaLWMG0403480400.01.P01	47	22	58	21	581	65.3	5.17	104.6	84.6	108.4	100.3	99.6	98.8	120.3	85.5	97.9
PaLWMG0709301900.01.P02	49	15	34	15	343	37.7	4.56	80.2	77.4	100.3	95.2	94.8	96.3	115.3	126.3	114.2
PaLWMG0706123100.01.P01	69	25	49	25	437	51.3	5.86	102.3	88.6	103.6	95.5	94.4	95.2	117.1	94.7	108.6
PaLWMG0604908800.01.P01	55	11	35	11	231	25.5	4.82	87.8	83.8	98.7	100.5	100.4	100.2	103.4	118.2	107
PaLWMG0403329600.01.P01	37	11	24	11	397	42.4	7.27	96.9	97.1	107.9	96.9	96.8	95.6	88	110.7	110.2
PaLWMG0302812100.01.P01	48	15	36	14	383	40.9	5.31	113.1	104.3	100.5	109.2	109	109	109.5	67.2	78.2
PaLWMG0202202900.01.P01	85	19	53	19	212	23.7	6.55	96.4	87.4	100.6	102.6	103.1	105.3	108.7	100.6	95.3
PaLWMG0807248200.01.P01	47	10	38	1	290	30.8	6	118.2	94.2	105.4	136.1	152	150.9	44.7	45	53.5
PaLWMG0202236000.01.P02	38	28	52	23	754	82.1	6.83	121.1	101.9	107.8	103.1	106.9	104.9	94.7	75.5	84
PaLWMG0810840300.01.P01	56	14	42	13	327	35.1	6.55	105.2	149.4	86.4	107.2	108.5	109.5	52.8	85.9	94.9
PaLWMG0202411100.01.P07	26	32	61	32	1214	134.1	5.47	109.4	100.4	105.1	93.2	94.9	94.4	129.6	82.2	90.9
PaLWMG0504130000.01.P02	28	29	43	29	1257	138.3	4.82	93.9	102.1	102.4	101.1	97.8	97.5	79.6	115.6	110
PaLWMG0403866500.01.P01	51	13	35	13	284	31.1	6.52	92.9	100.1	102.2	98.1	97.6	96.5	98.9	106.8	106.9
PaLWMG0100688800.01.P01	37	8	41	8	188	19.4	8.29	75.2	93.8	96.6	91.5	117.7	97.9	67.3	141.5	118.4
PaLWMG0806952900.01.P01	30	32	54	32	1268	141.7	5.92	90.1	91.4	100	100.5	98.9	100	100.6	112.5	106.1
PaLWMG0101025300.01.P01	38	19	48	19	528	59.1	8.9	104.5	115.3	105.2	101.8	104.2	106.5	71.1	92.1	99.2
PaLWMG0304039100.01.P01	49	6	34	1	158	17.7	7.42	87.8	83.6	116.4	123.9	128.2	140.8	27.4	102.6	89.4
PaLWMG0100961500.01.P01	38	19	49	18	544	60.4	9.07	102.2	114.3	94.1	111.7	114.7	119.3	73.7	77.7	92.2
PaLWMG0705854200.01.P01	40	6	37	5	156	17.7	4.7	88.1	94.9	104.7	103.2	100.7	104.9	69.4	127.5	106.6
PaLWMG0302502900.01.P01	41	10	42	10	223	24.9	8.72	117.7	111.7	112.7	104.3	103.7	106.2	55.4	88.9	99.3
PaLWMG0100046300.01.P03	36	20	48	17	625	71.4	5.92	111.3	116.1	104.6	98.9	101.4	103.1	81.1	80.5	103
PaLWMG0403752700.01.P02	26	46	59	46	1978	223.9	5.03	114.5	93.7	107	90.4	90.3	87.7	138	85.6	93
PaLWMG0705752500.01.P01	43	25	45	25	649	72.9	7.01	115.9	99.8	109.4	95.3	95.9	94.6	117.9	78.4	92.8
PaLWMG0101174000.01.P01	56	28	49	28	540	60.2	6.2	108.8	107.3	95.4	99.9	101.5	99.5	122	81.1	84.6
PaLWMG0806744000.01.P01	39	17	39	17	485	52.8	8.21	79.7	93	99.4	101.2	98.7	100.2	77.4	131.8	118.6
PaLWMG0403883500.01.P02	52	14	40	14	377	42	8	77.7	81	97.2	104.9	103.8	105.7	66.7	147.5	115.5
PaLWMG0101151200.01.P01	47	18	37	18	475	52.8	5.45	102.3	82.1	101.3	103.4	100.6	100.5	102.3	102.7	104.9
PaLWMG0403290500.01.P01	39	9	37	1	273	29.1	7.15	98	96.6	105.4	122.2	78.8	96.4	81.6	104.5	116.4
PaLWMG0403424200.01.P01	42	28	62	28	688	77.6	9.2	111.4	97.8	108.5	97.1	97	99.3	104.2	84.7	100.2
PaLWMG0806934500.01.P01	39	32	64	29	837	92.4	6.81	98.4	96.4	105.5	96.1	95.6	95.6	97.9	104.9	109.6
PaLWMG0100489000.01.P01	34	19	31	19	860	92.8	4.51	81.6	89.3	96.8	100.8	97	96.1	98.1	121.8	118.4
PaLWMG0504472700.01.P01	50	17	61	9	258	29.3	10.26	117.5	79	84.5	114.9	113.6	113.1	121.7	82	73.6
PaLWMG0706226400.01.P01	33	16	41	13	677	74.4	5.12	93.6	119	97.8	95.7	95.9	96.5	67.7	112.1	121.8
PaLWMG0201797400.01.P01	20	17	27	17	1295	134.4	9.39	84.7	90.1	97.3	98.6	96.3	95.9	99.3	122.6	115.2
PaLWMG0404039900.01.P01	65	10	31	10	168	17.5	3.89	93.1	102.4	100.7	93.6	97	104.5	58	140.5	110.2
PaLWMG0705638800.01.P02	63	20	50	20	379	42.2	5.22	106.6	121.7	102.9	103.6	105.8	107.9	79.1	80.7	91.7
PaLWMG0303173200.01.P02	50	12	42	11	314	35.7	4.81	84.9	86.4	94.4	100.1	98.8	95.8	79.1	146.8	113.6
PaLWMG0201728800.01.P01	32	24	35	24	974	107.1	5.94	102.3	106.7	112.3	98.2	93.4	94.8	98	93.4	101
PaLWMG0403865700.01.P06	11	7	32	4	641	69.3	9.33	95.6	85.8	88.5	115.1	117.4	117.9	112.4	84	83.2
PaLWMG0806652600.01.P01	27	9	33	9	463	50.9	9.07	82.2	99.3	102.2	100.4	102.4	106.2	73.3	121.7	112.2
PaLWMG0202188600.01.P01	44	22	51	22	613	68.5	5.53	105.9	95.2	103.8	96.1	96.5	96.8	120.7	85	100
PaLWMG0706003200.01.P01	27	12	34	1	559	62.2	6.23	108.2	93.5	97.4	96.3	109.3	107.9	129.5	68.6	89.3
PaLWMG0504416300.01.P01	67	29	61	21	446	50.3	8.54	108.3	95.8	107.2	94.7	95.2	93.5	110.3	91.6	103.3
PaLWMG0806416400.01.P01	48	21	57	13	445	49.7	8.78	94.9	97.1	97.5	96.3	99.5	98.2	93.2	112.7	110.5
PaLWMG0580000739.01.P01	26	11	35	11	494	53	5.35	88.9	88	97.2	92.6	93.6	96.9	84.8	136	122
PaLWMG0705792300.01.P01	15	2	23	2	209	21.8	7.99	79.9	69.9	101.2	111.6	113.8	112.8	107.4	118.4	85.1
PaLWMG0100058800.01.P02	22	7	34	7	467	47	7.5	87.7	75.2	96.6	119.2	113.3	112.3	114.4	95.3	86.2
PaLWMG0706024500.01.P01	48	10	36	10	270	29.7	7.49	107.4	101.3	88	108.2	109	109.4	168.2	51.3	57.2
PaLWMG0604987500.01.P01	50	14	35	11	355	38.4	6.09	109	149.9	104.3	107.8	109.5	110.6	58.3	65.4	85.1
PaLWMG0302486900.01.P01	58	8	46	4	147	16.4	10.67	97.9	82.8	92.8	108.4	107.1	106.3	100.8	106.3	97.5
PaLWMG0101281500.01.P02	58	17	47	15	308	32.7	8.05	82	89.6	99.8	103.4	98.9	99.5	86.5	124.1	116.2
PaLWMG0201945300.01.P05	18	37	51	37	2394	265.4	6.09	114	95.6	107.2	94.5	94.2	93.2	128	80.7	92.7
PaLWMG0605506400.01.P01	46	16	49	16	383	42.7	8.73	103.3	84.7	103.5	93.9	93.9	94.3	146.3	85.2	94.9
PaLWMG0303248300.01.P01	35	19	43	2	637	70.7	5.52	100	118	95.8	98.3	106.9	114.9	115.8	76.6	73.8
PaLWMG0607263200.01.P01	54	12	30	11	325	34.8	9.28	87.1	104.9	110.2	90.1	90.3	90.3	56	147.2	124
PaLWMG0303517000.01.P01	24	7	32	7	375	41.8	5.41	96.1	78.3	103.6	105.5	104.6	105.5	128.7	86.8	90.9
PaLWMG0202001400.01.P01	30	11	48	11	425	43.6	6.15	82.6	95.4	98.9	94.8	92.5	94.6	72	145.1	124
PaLWMG0404030800.01.P01	49	11	37	11	336	36.7	5.22	96.9	137	113.5	88.7	90.5	92.5	53.4	113.8	113.8
PaLWMG0806635000.01.P02	68	9	42	9	136	15.1	5.29	87.1	83.6	95.7	107.7	100.7	103.3	94.1	121.5	106.4
PaLWMG0303214600.01.P01	42	21	39	21	544	59.7	6.33	111.4	106.8	108.6	98.3	98.8	98.3	87.1	91.9	98.8
PaLWMG0403312200.01.P01	30	22	42	10	983	108	6.35	90.8	100.2	95.4	94.9	97.3	93	86.3	126	116.1
PaLWMG0303195600.01.P01	24	15	39	15	810	85.9	6.54	97.2	121.2	108	95.6	98	99	72.1	103.3	105.6
PaLWMG0504647000.01.P01	43	16	38	13	471	52.5	5.45	107.3	99.4	109.5	94	94.2	93.7	123.7	82.2	95.9
PaLWMG0100867400.01.P01	57	15	36	15	262	27.7	10.62	82.7	73.6	97.1	104.7	105.7	104.1	129.3	108.5	94.3
PaLWMG0201998000.01.P01	66	12	32	12	223	24.5	6.67	107.8	99.7	95.4	104	106	107.5	117.4	78.5	83.6
PaLWMG0201627300.01.P01	33	10	41	4	341	37.1	8.95	115.8	91	140.4	106.3	103.4	104	48.7	97.8	92.7
PaLWMG0202795500.01.P01	62	11	63	5	151	17.1	10.39	80.1	87.8	92	105.6	104.7	101	114.8	114.4	99.5
PaLWMG0706285400.01.P01	22	20	34	12	1115	123.8	4.92	103.2	93.2	111.4	94.7	90.8	89.8	130	100.1	86.7
PaLWMG0806957400.01.P01	55	14	32	14	304	31	9.16	103	103.8	106.1	93.9	93.1	93.2	106.1	98.2	102.5
PaLWMG0605008900.01.P01	44	32	51	4	761	83.7	5.38	110	80.9	98.1	93.8	96.9	96.4	172.5	70.2	81.2
PaLWMG0101764400.01.P01	52	9	29	9	242	27.3	7.96	97.3	94.6	100.7	99.7	104	107.7	108.1	91.4	96.6
PaLWMG0100550800.01.P01	54	17	41	3	343	37.6	6.37	102.1	87.9	108.8	97.8	98	96	100.2	104.8	104.3
PaLWMG0806784900.01.P01	43	23	45	22	629	69.1	5.34	95.4	99.9	101.7	92.2	94.1	95.4	85.2	118.6	117.5
PaLWMG0101469900.01.P01	42	14	44	2	368	39.3	7.31	84.5	97.1	80.6	76.8	75	76.5	50.1	180.5	178.8
PaLWMG0302680000.01.P01	48	19	40	19	449	48.7	8.27	87.6	98.1	101.2	100.7	97.2	95.5	77.5	128.9	113.3
PaLWMG0100245600.01.P01	57	11	29	11	288	32.1	7.02	86.5	76.8	97.7	109.7	110	110.5	91.4	120.7	96.7
PaLWMG0605358200.01.P01	37	26	49	26	697	76.5	5.5	107.7	125	101.8	102.1	103.3	101.7	101.9	76	80.3
PaLWMG0303203300.01.P01	38	29	50	29	989	110.6	5.12	105.7	89.5	108.5	96.6	93.4	93	141.1	82.4	89.9
PaLWMG0100282900.01.P01	58	16	59	14	400	42.3	8.6	101.5	92.2	102.2	97.1	99.4	98.7	119.2	92	97.6
PaLWMG0100659000.01.P01	36	24	42	24	735	82.2	7.28	123	105.2	98.6	98.5	98.8	98.4	128.9	70.2	78.2
PaLWMG0705731300.01.P01	59	19	38	19	422	45.7	7.14	95	96.2	105	95.9	96.6	95.5	82.6	119.9	113.3
PaLWMG0302559000.01.P01	57	9	68	5	143	15.8	10.14	77.7	82.9	96.6	105.8	105.2	105.6	75	139	112.3
PaLWMG0302723500.01.P01	37	21	43	21	640	68.4	9.33	112	91.5	104.7	96.8	99.1	97.5	116.1	86.2	96.2
PaLWMG0100194900.01.P01	39	15	48	15	333	37	7.39	105.8	108.9	94.4	103.4	106.5	106.8	110.4	75.2	88.5
PaLWMG0202109800.01.P01	36	26	40	26	834	93.3	9.69	97.6	82.9	97.8	90.1	87.6	84.8	181	89	89.2
PaLWMG0100029000.01.P01	46	17	38	17	471	50.8	5.59	108.7	102	109	102.6	101.3	100	83.4	93.7	99.5
PaLWMG0807068600.01.P01	44	13	45	13	333	36.2	7.05	85.8	99.9	104.4	98.3	98.3	100.6	54.1	139.6	119
PaLWMG0403843200.01.P02	53	21	40	21	421	47.6	6.9	106.9	93.9	96.2	93.7	95.3	98	149.2	77.9	88.9
PaLWMG0403946200.01.P02	35	21	41	21	744	81.4	5.99	114.6	117.9	107.7	98.6	98.2	99.7	100.8	75.5	87
PaLWMG0403414900.01.P01	54	16	38	16	325	35.4	6.42	96.3	91.5	99.7	98.3	98.1	99.2	127.8	95	94
PaLWMG0101823200.01.P01	35	15	33	11	550	61.3	9.09	85	153.7	78.2	100.8	101.7	108.4	46	103.3	122.8
PaLWMG0504317000.01.P01	92	15	67	15	147	16.5	4.96	76.1	84.9	93.9	98.8	99.1	99.1	75.9	152.8	119.4
PaLWMG0100651800.01.P02	42	13	70	12	332	38.4	8.29	88.3	128.8	113	88.6	91.2	93	65.2	128.1	103.9
PaLWMG0201848200.01.P02	36	16	41	16	440	48.1	7.62	121.4	84.8	109.4	94.9	90.6	91.8	136.5	83.6	86.9
PaLWMG0403575900.01.P01	53	22	51	22	395	42.7	9.16	92.9	86.8	109.1	96	94.4	94.1	106.9	109.5	110.4
PaLWMG0404919800.01.P02	39	20	39	8	598	68.7	5.94	166.3	66.8	98.7	81.6	80.7	80.2	183.7	69.2	72.9
PaLWMG0807161200.01.P01	47	10	36	1	290	30.9	6	55.2	59.7	53.2	97.6	105.9	92.6	247.1	90.3	98.4
PaLWMG0403754700.01.P01	51	21	45	13	417	47.2	7.72	110	127	99.6	98.7	107.7	107.3	100.9	67.8	81.1
PaLWMG0705643100.01.P01	51	17	39	14	356	38.7	7.02	105.1	89.3	99.8	100	99.9	101.6	110.8	95.6	97.8
PaLWMG0100727900.01.P01	49	12	38	12	268	30.1	6	97.6	93	101.7	95.6	97.2	98.8	124.4	91.7	100.1
PaLWMG0303130900.01.P01	38	22	34	22	706	77.5	5.43	99.6	97.9	103.4	92.5	95.2	94.5	90.5	111.4	114.8
PaLWMG0303061800.01.P01	78	8	42	6	143	15	6.89	82	83.7	95.2	109.3	109.2	105.9	134.1	94	86.4
PaLWMG0605578000.01.P01	44	11	30	11	279	29.9	5.99	85.6	83	93.1	111.8	110	111.6	81.6	117.8	105.5
PaLWMG0100377400.01.P01	44	14	31	13	432	47.7	6.46	100.5	77.1	99.5	94.6	93.4	90.8	176.7	80.9	86.5
PaLWMG0302504000.01.P02	50	16	30	16	452	49.4	5.25	81.2	77	98.1	105.9	106.8	103	112.8	116.4	98.8
PaLWMG0806657100.01.P03	40	11	46	11	304	33.1	5.52	95.2	81.1	84.8	112.8	111	112.1	112.6	101.7	88.7
PaLWMG0706003800.01.P01	27	13	34	2	558	62	6.43	115	104.6	103.1	98.9	99.3	94	118.8	76.7	89.6
PaLWMG0100302900.01.P01	54	20	46	20	412	44.9	5.38	103.3	73.2	92.4	92.4	92.1	99.1	188.6	73.1	85.8
PaLWMG0705647400.01.P01	57	12	46	10	184	21	6.44	88.9	86.7	94.7	108.1	104	103.6	74.8	129.4	109.7
PaLWMG0504400200.01.P01	51	18	49	15	348	38.1	6.7	108.8	103.8	110.6	91.6	93.3	94.1	92.9	94.6	110.4
PaLWMG0504268500.01.P01	35	11	40	7	326	36.1	7.9	88.8	115.4	71.7	87.5	90.1	89.9	50	162.7	144
PaLWMG0100649300.01.P01	65	16	34	16	286	32.4	5.05	90.5	81.9	97.1	101.9	106.4	107.9	95.5	121.3	97.4
PaLWMG0100759400.01.P01	63	3	41	3	46	4.9	7.18	95.9	94.9	104.5	89.4	90.8	89.2	86.3	137.7	111.3
PaLWMG0806495900.01.P01	38	10	25	10	360	38.5	7.39	110	103.2	109.8	92.8	92.8	92.9	90.3	94	114.2
PaLWMG0605140800.01.P01	11	7	42	1	804	89.4	7.36
PaLWMG0100674400.01.P01	44	3	25	3	86	9.7	8.75	91.7	80.9	86	106.3	105.7	108.1	140	89.7	91.6
PaLWMG0605369800.01.P01	51	6	45	6	103	11.4	11.47	80.4	79.4	83.8	103.3	110.8	113.2	115	114.9	99.3
PaLWMG0101257500.01.P01	56	16	40	16	338	38.5	6.1	98.4	98.9	100.2	97.8	98	99.1	100	102.9	104.8
PaLWMG0100219800.01.P01	47	21	43	21	440	48.4	9.26	79.7	85.2	97	101.4	99.9	100.9	90	131.3	114.6
PaLWMG0101296600.01.P01	52	17	56	9	249	28.2	10.77	91.8	78.2	90.8	107.6	109	108.4	106.3	107.1	100.8
PaLWMG0100346500.01.P01	48	10	45	10	162	18.3	4.79	107.5	82.4	111.8	99.4	96.1	96.8	97.1	111.1	97.7
PaLWMG0303107600.01.P02	38	23	43	23	583	67.1	8.16	105.9	93.2	99.8	89.7	91.6	92.4	134.4	90	103
PaLWMG0303138500.01.P01	40	21	49	18	668	73.5	7.09	109	112.5	100.3	101.1	99.3	100.7	102.3	79	95.7
PaLWMG0605220100.01.P01	36	12	24	12	481	51.5	8.37	111.3	103.8	99.7	104.5	102.7	103.1	119	70.5	85.5
PaLWMG0100694300.01.P03	38	9	41	7	183	20.7	10.36	91.2	84.9	101.4	105.3	101.3	101.9	99.7	113.3	101
PaLWMG0100023300.01.P01	46	31	63	22	574	65.8	8.44	174.3	59.1	98.8	88.3	85.7	84	185.6	64.2	60.1
PaLWMG0100969500.01.P01	35	18	38	10	490	55.9	8.06	113.6	119.5	98.9	100.4	106.6	104.5	95.7	75.3	85.4
PaLWMG0302712100.01.P02	62	11	28	11	274	28.3	5.34	111.3	100.4	103	96.2	97.3	99.3	107.8	90.3	94.4
PaLWMG0101005100.01.P01	50	13	35	13	296	32.2	5.53	103.6	93.5	106.5	95	96.7	95.2	108.2	99.9	101.4
PaLWMG0302814800.01.P01	90	6	24	4	110	11.2	4.41	70.8	77.7	94.9	105.1	105.1	103.1	89.2	137.1	116.8
PaLWMG0201509100.01.P01	42	14	42	2	368	39.3	7.31	111.4	107.8	108.3	102.4	100.2	100.4	110.7	83.4	75.4
PaLWMG0101474900.01.P01	51	17	41	17	267	29.6	9.82	101.6	89.2	102.6	105.3	105.4	104.9	86.2	102.7	102.2
PaLWMG0806693600.01.P01	42	16	38	16	556	58.8	4.81	91.1	96.4	103.7	101.1	100.7	99.1	92.3	113	102.6
PaLWMG0101442700.01.P01	26	17	38	11	788	89.6	6.73	121	109.4	98.7	98.1	97.9	96.8	123.3	73	81.9
PaLWMG0705937700.01.P01	35	33	51	33	1058	117.8	7.06	89.7	93	102	99.2	98	97.7	93.7	114	112.6
PaLWMG0302439100.01.P01	39	14	36	11	372	39.7	9.33	114.9	144.4	97.2	108.8	109	113.1	93.1	55.1	64.3
PaLWMG0101250500.01.P01	40	6	26	6	270	28.9	5.48	78.1	85.6	95	94	95	92.7	86.5	144.2	128.7
PaLWMG0201486200.01.P01	62	11	65	5	151	17.1	10.32	88.3	93.1	94.9	102.1	101.3	102.1	100.2	119.2	98.9
PaLWMG0504733200.01.P01	32	32	45	32	1237	132.9	6.74	136.7	98.3	104.4	97.8	96.9	96.4	125.3	71.1	73.2
PaLWMG0302825900.01.P01	47	5	30	1	158	17.7	7.42	102.6	105.7	127.5	123.5	125.6	139.8	103.9	34.8	36.7
PaLWMG0303112200.01.P03	32	26	50	23	920	103.8	5.03	104.4	122	101.1	102.6	102.8	102.8	104	80	80.3
PaLWMG0404042500.01.P01	50	13	39	13	270	28.7	5.15	85.7	87.1	94	90.8	90.6	89.3	73.9	155.8	132.8
PaLWMG0202355300.01.P02	42	27	36	27	812	89.2	4.6	108	99.1	111.9	93.5	92.9	92.1	100.1	94.6	107.8
PaLWMG0403747100.01.P02	42	11	39	7	295	32.2	7.91	96.7	146.5	81.5	101.1	103.9	103.7	44.7	103.9	117.9
PaLWMG0605367000.01.P01	52	14	24	13	463	48.1	6.4	93.2	84.4	93	106.8	105.3	104.7	93	110	109.5
PaLWMG0304278600.01.P02	37	6	34	6	183	20.9	9.96	98.4	84.9	83.9	104.7	109.3	107	120.9	93.7	97.2
PaLWMG0705979200.01.P01	31	5	24	5	228	25.4	11.41	98.3	92.4	103.4	108.5	103	103.8	112.5	88.3	89.8
PaLWMG0403504300.01.P02	44	10	29	10	202	22	9.04	87.4	86	100.2	102.1	103.6	104.2	70.4	139.1	107
PaLWMG0605468800.01.P01	48	27	46	26	625	69.4	5.62	101.2	107.4	103.1	96.1	93.9	95.4	78.8	110.7	113.4
PaLWMG0101034700.01.P01	30	23	41	18	893	99.4	6.6	104.7	105.2	103.5	101.8	97.3	99	88.3	94.6	105.7
PaLWMG0202339300.01.P01	32	27	48	23	951	108.5	6	112.5	103.2	97.4	103.3	102.8	101.4	102.6	84.4	92.3
PaLWMG0403322700.01.P01	46	16	38	9	421	47.7	7.44	107.1	105.7	98.4	94.5	97.8	100.2	99.4	94.7	102.2
PaLWMG0101008700.01.P01	34	9	30	9	338	37.5	7.52	80.7	118.2	76	83.6	89.1	86	50.8	164.2	151.6
PaLWMG0504359200.01.P02	39	19	33	19	597	65.4	4.74	91.5	94.6	102.4	97.7	95.4	94.1	87.4	124.3	112.7
PaLWMG0605436100.01.P02	47	18	50	18	395	43.5	6.86	109	89.4	90	103.1	102.8	101.4	127	91.1	86.1
PaLWMG0604975500.01.P01	39	9	58	9	251	27.1	7.59	79.6	87.2	96.6	96	97.8	96.7	90.3	138.3	117.3
PaLWMG0100691600.01.P01	65	13	38	13	202	22.3	5.6	88.6	91.9	102.4	101.8	99	100.1	88.1	121.2	106.9
PaLWMG0101190700.01.P01	53	11	41	11	221	25.2	7.06	97.1	90.8	91.7	97.1	101.8	101.8	137.1	91.4	91.1
PaLWMG0504140300.01.P01	43	18	32	18	606	65.9	6.98	112.5	96.9	102.1	95.1	94.6	94	135.1	79.9	89.7
PaLWMG0302674400.01.P01	38	9	28	9	286	30.8	8.09	96.4	95.8	102.2	93.4	96.4	96.1	79.1	121.5	118.9
PaLWMG0101389700.01.P01	34	22	42	21	779	83.6	7.33	100.4	102.3	99.2	101.7	103.5	102.9	81	100.2	108.8
PaLWMG0202169800.01.P01	27	18	38	14	719	78.1	6.51	115.8	108.8	112.8	98.6	96.7	96.6	101.1	80.5	89
PaLWMG0404029600.01.P01	44	19	55	15	427	47.3	6.13	99.7	96.2	103.7	91.8	90.7	94.5	105.2	99.3	119
PaLWMG0303179700.01.P02	35	12	33	12	283	30.6	8.5	105.3	113.1	109.1	95.7	98.9	97.9	77.2	92.6	110.2
PaLWMG0100866700.01.P01	47	8	41	7	181	20.1	8.27	110.9	108.9	101.1	97.8	99.6	100.4	93.8	95.2	92.2
PaLWMG0100754400.01.P01	42	23	43	17	534	58.1	7.71	114.8	116.6	105.1	94.9	94.9	95.2	88.8	84.1	105.7
PaLWMG0806738600.01.P01	26	17	37	17	768	81.4	8.94	96.7	94.6	91.7	103.7	106.5	106.1	111	95.7	94
PaLWMG0403859000.01.P01	53	13	27	13	344	37.5	5.81	103.1	121.5	104.9	96.6	97.9	96.4	70.5	101.5	107.5
PaLWMG0806493100.01.P01	35	8	21	8	327	35.5	7.56	115.8	111.9	105.6	108.9	108.7	107.5	90.2	67.5	83.9
PaLWMG0806645700.01.P01	25	13	33	10	562	64.4	8.87	96.1	102.9	100.5	90.9	91.7	92.3	76.1	125	124.7
PaLWMG0100440600.01.P01	29	32	42	32	1182	134.6	6.47	122.5	103.5	102.4	93	93	92.3	153	63.8	76.6
PaLWMG0302603800.01.P01	25	31	43	31	1205	137.8	5.21	112.3	87.2	106.2	90.6	87.6	87.2	134.6	93.3	101
PaLWMG0807149000.01.P01	36	13	26	13	501	54.9	9.19	70.5	97	98.8	89.7	93.8	100.5	51	166.9	131.8
PaLWMG0302568700.01.P01	56	18	32	18	410	46.2	5.57	121.5	91.2	105.6	91.3	93.9	90.7	142.9	74.6	88.3
PaLWMG0404021100.01.P01	51	21	45	21	408	44.3	8.63	111.1	99.9	102.4	90.8	91.1	91.5	142.1	80.2	90.9
PaLWMG0302481500.01.P01	41	13	33	13	406	44.5	7.69	89.1	103	105.9	97	99.9	99	60.7	130.6	114.8
PaLWMG0403563300.01.P01	38	26	44	26	809	89.5	5.11	102.3	93.4	104.3	96.4	95.6	95.2	123.1	89	100.8
PaLWMG0706064100.01.P01	51	18	37	18	352	39.1	6.1	106.6	93.7	101.6	103.4	100.6	102.2	107.2	87.5	97.1
PaLWMG0100725600.01.P01	30	13	30	13	584	63.8	7.52	96.5	125.2	103.1	96.2	100	101.2	48.6	106.7	122.5
PaLWMG0403311700.01.P01	30	24	42	24	928	106	6.13	103.1	105.8	98.6	105.4	106.1	105.5	100.4	85.2	89.8
PaLWMG0403309100.01.P01	34	22	42	21	848	94.4	6.96	95	109.6	104.8	101.7	102	95.5	68.2	111.8	111.4
PaLWMG0403724300.01.P01	56	15	36	15	379	41.6	6.89	100	100.4	99.8	95.8	97	96.1	102.2	101.7	106.9
PaLWMG0302786200.01.P01	33	16	39	16	514	56.6	8.72	97.7	108.2	91.4	96.9	100.2	100.7	79	109.9	116
PaLWMG0101254600.01.P01	29	12	37	12	456	50.5	7.08	104.3	97.7	95.7	107.1	108.4	109.2	115.4	77.6	84.7
PaLWMG0100722400.01.P01	48	24	47	24	535	59.2	5.81	120.1	99.1	98.5	96.4	93.7	92	150.4	70.4	79.3
PaLWMG0100768400.01.P01	51	13	48	13	239	26.6	6.65	99.8	107.8	101.3	94.5	95.3	98.1	79.1	108	116.2
PaLWMG0705744500.01.P01	35	20	42	17	668	73.8	7.93	113.7	125.8	106.4	106.4	108	108.4	70	75	86.1
PaLWMG0201530600.01.P01	39	14	49	14	355	39.2	9.26	89.3	80.9	104.4	98.1	99	97.5	113.8	111.1	106.1
PaLWMG0100261600.01.P01	41	17	41	16	545	59.3	7.42	86.6	129.5	104.7	99.5	103.4	108	60.4	107.5	100.4
PaLWMG0201896400.01.P01	68	13	35	2	208	23.1	7.9	98.9	136.4	94	114.6	114	117	88.9	66.9	69.3
PaLWMG0403841800.01.P01	34	27	45	26	916	101.9	6.48	109.7	130.6	103.7	102.3	105.3	103.7	93.5	76.2	75
PaLWMG0202205100.01.P01	34	16	30	3	541	61.4	7.17	93.4	102.6	92.4	110.6	112.4	114.6	81.4	96.7	95.8
PaLWMG0202409900.01.P01	37	9	28	9	260	27.6	9.7	88.7	89.4	102.5	96.1	94.8	97.9	91	122.1	117.4
PaLWMG0304630500.01.P01	47	21	51	21	419	45.7	7.91	79.5	84.5	94.9	102.1	99.8	101.2	96.3	133.7	108
PaLWMG0504293300.01.P01	18	35	46	35	2313	246.8	5.2	94.7	91.7	99.7	97.4	95.1	92.6	116.8	104.7	107.5
PaLWMG0302799900.01.P02	45	11	31	9	357	39	6.33	90.8	90.4	102.4	95	95.6	100.4	102.3	109.7	113.4
PaLWMG0101098100.01.P01	20	7	28	7	493	51.8	6.55	94.3	120	108.1	101.3	102.1	101.6	51.1	106.6	114.8
PaLWMG0806438500.01.P01	22	17	27	17	847	93.1	6.3	106.7	90.7	102.5	95.5	95.9	95.8	128	86.9	98.1
PaLWMG0100330500.01.P01	74	6	20	1	113	12.5	5.48	84.9	83.6	93.6	108.6	107.7	106.9	61	130.1	123.6
PaLWMG0202113900.01.P01	17	21	31	15	1388	152.1	6.61	106.8	84.7	101.5	90.9	88.6	85.5	144.7	94.3	103.1
PaLWMG0201905700.01.P01	34	20	30	20	801	89.2	5.44	92.8	86.6	94.5	101.4	99	100.6	126.3	102.7	96.2
PaLWMG0706107200.01.P01	25	29	46	29	1380	153.3	5.94	104.3	82.9	105.5	95.3	94.3	94.3	142.3	85.6	95.5
PaLWMG0504472600.01.P01	36	24	52	24	584	65.1	5.29	78.5	85.9	90.9	100.1	99.6	96.8	94.9	134.5	118.8
PaLWMG0303463100.01.P03	33	10	43	2	216	24.2	10.37	114.3	78.6	81.9	123.2	120.1	112	105.3	90.2	74.4
PaLWMG0100241800.01.P03	20	37	48	37	2015	222.5	7.85	108.5	95.2	106.6	94.5	92.2	89.9	123.8	90.2	99.1
PaLWMG0605113300.01.P01	51	10	21	9	272	28.6	6.15	154.1	90.6	149.8	95.9	89.8	91.7	60.4	81.7	85.9
PaLWMG0100073300.01.P01	59	11	39	7	134	15.4	10.14	93.2	86.5	80.1	124.8	130.7	134.3	115.7	65.1	69.7
PaLWMG0605575600.01.P01	56	17	53	8	260	29.7	9.88	98	81.7	90.5	105.9	107.5	105.5	107.6	101	102.3
PaLWMG0604974100.01.P01	36	9	46	2	234	25.8	4.83	93.1	118.7	80.5	108	115.3	112.2	63.2	93.9	115.2
PaLWMG0504173400.01.P01	49	13	43	5	207	23.9	10.83	100.6	90	103.8	102.5	101.7	101.1	92.1	105.8	102.3
PaLWMG0806604200.01.P02	34	10	25	10	434	44.6	8.47	82.4	79.7	97.8	108.6	107.4	105.9	103	115.4	99.8
PaLWMG0605410900.01.P01	27	11	28	11	475	52.1	8.41	86.2	87.6	94.5	100.4	105.3	111	129.7	90.7	94.6
PaLWMG0100995000.01.P01	17	10	26	6	851	94.5	8.4	105.4	125.8	104.8	97.4	97.9	97.9	62	100.9	107.9
PaLWMG0504286900.01.P02	40	21	37	19	566	63.2	8.98	114.2	130	108.9	99.1	96.5	96.2	78.6	78.8	97.7
PaLWMG0101273600.01.P01	67	8	46	1	112	12.3	9.58	97.5	73.7	86.3	109.5	104.1	103.1	173.9	79.8	72.1
PaLWMG0604967200.01.P02	31	8	23	5	283	30.4	6.21	108.4	99.2	103.9	96.4	97.5	100.5	91.9	99.7	102.5
PaLWMG0504753100.01.P05	34	23	30	23	900	98.2	5.54	84.6	89.6	95.9	99.7	98.9	96.6	84.1	129.5	121.1
PaLWMG0605335200.01.P01	43	16	35	12	423	46.9	6.05	112.8	104.3	110.3	99.2	96.4	95.8	118.4	77.9	84.8
PaLWMG0100255600.01.P01	35	15	42	14	491	53	7.25	96	93.9	101.8	94.6	98.4	99.5	98.7	106.5	110.5
PaLWMG0806498100.01.P01	36	31	61	27	810	92.4	6.27	113	111	106.1	103.6	105.7	104.1	85.6	80.1	90.8
PaLWMG0202054300.01.P01	38	19	39	19	604	66.6	7.8	110.8	105.6	103.5	98.4	99.1	97.5	109.7	82.2	93.1
PaLWMG0706146000.01.P01	66	14	33	14	276	29	8.81	99.8	108.5	100.6	97.8	98.4	97.8	78	108.9	110.3
PaLWMG0202128100.01.P01	70	6	24	6	134	14.9	5.49	88.5	99.9	97.2	98.7	98.3	97.7	78.4	132.3	109
PaLWMG0303087400.01.P01	44	22	40	22	603	68.1	6.6	101.4	138.7	99.6	109.8	111.3	112.5	81.5	70.1	75
PaLWMG0504363300.01.P01	48	8	28	6	225	24.3	8	106.6	117.6	139.7	89.4	88.4	92.4	48.6	122.7	94.6
PaLWMG0605444700.01.P01	26	20	35	19	873	96.9	4.77	105	84.6	103.6	89.2	91.7	93.5	152.2	87.5	92.8
PaLWMG0806675300.01.P01	54	14	49	14	361	38.8	4.6	76.7	87.5	91.3	110.6	108.6	110.7	86.2	118.3	110.2
PaLWMG0403949600.01.P02	51	14	29	14	381	41.3	5.11	107.5	93.5	111.3	94.4	92.5	93.2	119.7	88.3	99.7
PaLWMG0806496400.01.P03	27	6	42	2	214	24.9	11.4	90.2	79.5	83	131.7	122.6	121.2	121.3	76.8	73.7
PaLWMG0100735800.01.P01	44	27	45	27	560	60.4	8.16	82.5	95.2	97.9	95.9	96.7	95.5	83.4	129.8	123.2
PaLWMG0100864700.01.P01	28	20	50	20	675	74.9	6.33	99.6	98.8	90.8	118.2	116.9	117.4	101.4	73.1	83.7
PaLWMG0100913100.01.P01	41	23	42	15	621	69.7	7.84	106.8	103.8	101.2	93	96.5	94.9	82.4	105.2	116.2
PaLWMG0303451900.01.P02	31	15	28	12	648	73	6.2	96.2	105.6	104.4	97.1	98.8	97.8	75	108	117.1
PaLWMG0100103300.01.P01	40	15	53	4	379	42.8	6.86	109.8	121.6	102.1	102.3	100.9	102.2	84.8	89.8	86.6
PaLWMG0100898700.01.P01	49	9	37	9	150	16.5	9.39	79.5	90.5	98.1	101.7	102	105.3	64.8	137.2	121
PaLWMG0201680000.01.P01	61	8	49	8	132	15	8.7	83	94.7	95.1	101.3	101.3	102.5	89.8	121	111.3
PaLWMG0303196200.01.P01	62	15	38	15	246	27.4	6.07	97.6	91.8	103.1	99.2	100.4	98.4	108	102.7	98.7
PaLWMG0201834400.01.P01	31	16	37	16	514	57.8	8.88	101.4	127.7	99.1	104.5	106	105.6	83.7	79.8	92.1
PaLWMG0705892000.01.P01	39	16	41	16	533	58.1	7.75	108	125.4	104.1	100.5	102.1	102.4	79.1	79.6	98.5
PaLWMG0504722800.01.P02	34	18	40	18	549	61.4	5.52	110.3	120	99.3	105.9	104.9	103.4	103.4	73.7	79.1
PaLWMG0101332200.01.P01	34	11	35	1	374	40.5	7.33	90.4	184	82.1	107.2	106.6	110.1	41.4	89	89.2
PaLWMG0605136200.01.P01	25	30	38	15	1118	131	5.85	110.2	122.9	99.2	106.7	103.4	103.8	105	70.9	78
PaLWMG0403991800.01.P01	37	8	31	8	232	24.9	9.48	81.1	81.8	95.4	108.4	107.1	104.6	69.3	148	104.2
PaLWMG0705694200.01.P01	72	17	40	16	223	24.3	6.37	78.1	86	96.1	102.4	99.4	99.7	94	131.7	112.7
PaLWMG0201999700.01.P01	26	34	47	33	1524	169.4	5.63	108.9	111.5	105	98	98.7	99	117.9	75.7	85.5
PaLWMG0101053000.01.P01	25	13	28	13	535	60.7	9.17	108.7	132.3	103.8	106.8	108.6	107.3	82.8	69.1	80.6
PaLWMG0202365300.01.P01	22	16	43	3	703	80.8	5.12	95.9	78.2	87.1	101.1	97.3	97.3	174.9	79.4	88.8
PaLWMG0605548600.01.P02	30	25	41	25	966	107.2	6.39	107	135.3	108	101.7	102.1	104.2	70.5	76.2	94.9
PaLWMG0101150700.01.P01	54	14	30	13	308	33.3	8.79	104.7	121.3	103.2	95.5	98	98.2	63	98.7	117.3
PaLWMG0100956400.01.P01	45	17	36	17	339	37.8	7.42	79.9	84.7	97	104.7	102.2	103.9	78.1	136.7	112.9
PaLWMG0101006400.01.P01	35	11	37	10	308	33.9	5.9	97.3	97.2	96.4	96.4	101.7	132.4	81.9	90.9	105.7
PaLWMG0101147300.01.P02	27	19	32	19	867	96.1	6.51	109.9	126.6	103	106.4	106.7	106	97	70.7	73.9
PaLWMG0705858800.01.P01	32	12	26	11	405	43.1	4.75	95	88	102	100.7	99.7	98.5	115.3	100.2	100.8
PaLWMG0705755000.01.P03	46	17	31	17	524	56.8	6.62	104	99.7	110.3	97.3	96.3	96.6	85	98.1	112.7
PaLWMG0303099100.01.P02	33	15	39	15	446	47.8	9.2	94	86.2	99.8	92.7	92.2	92.4	125	105.6	112.2
PaLWMG0201756400.01.P02	28	33	46	19	1139	133.3	5.8	120.3	133.7	104.2	103.3	101.7	101.3	108.1	60.1	67.4
PaLWMG0403692700.01.P01	27	4	26	4	139	14.3	9.58	75.5	75.2	99.1	109.2	109.6	114.4	99	121.2	96.7
PaLWMG0302511500.01.P01	34	5	18	5	237	26	5.34	81.6	69.2	108.6	117.5	113.4	107.5	106.6	103.4	92.2
PaLWMG0101003700.01.P01	54	22	42	21	527	58.1	7.14	105.4	141.1	96.9	103.8	105	104.6	83.1	77	83.1
PaLWMG0806807800.01.P01	37	15	32	15	476	52.6	6.39	95.3	136.5	96.4	97.6	100.5	100.9	55	110.6	107.3
PaLWMG0504577000.01.P01	36	12	37	10	372	38.9	8.15	106.3	98.5	102.9	100.9	102.8	103.6	98.2	91.5	95.3
PaLWMG0604779800.01.P01	23	22	35	14	1115	123.3	4.83	104.5	99	109.8	95.5	94	93.4	105.2	95.5	103.2
PaLWMG0302816200.01.P01	31	30	36	30	1124	123.8	6.47	111.2	113.5	103.7	96.1	98.5	97.3	100.5	86.8	92.3
PaLWMG0706025100.01.P01	36	16	41	16	477	52.2	9	90.9	109.5	103.2	91.1	94.6	94.7	65	133.5	117.5
PaLWMG0101039200.01.P01	58	10	25	10	189	20.6	8.72	83.6	81.4	89.6	105.3	107.5	116.7	89.2	125.6	100.9
PaLWMG0203295800.01.P01	66	9	37	4	122	13.7	9.63	80.9	81	97	102.6	107.5	103.4	132	101.9	93.7
PaLWMG0705660400.01.P02	53	9	39	7	171	18.3	5.35	83.6	80.4	96.2	104.1	104.5	103.5	141.4	98	88.2
PaLWMG0100166800.01.P02	50	11	30	11	301	32.9	5.91	107	140.9	101.8	109.9	115	113.2	79.5	64.6	68
PaLWMG0303163700.01.P01	27	16	36	14	841	93.1	8.37	101.7	119.5	105.3	98.6	100.3	100.4	69.1	96.5	108.7
PaLWMG0504370000.01.P01	30	16	31	12	522	56	6.92	92.4	112.9	107.8	96.8	95.1	96.7	60.1	124.1	114
PaLWMG0202248600.01.P01	26	7	23	4	290	30.9	9.31	101.5	163.8	115.3	116.8	122.9	123.7	57.2	51.2	47.6
PaLWMG0302495200.01.P01	32	18	30	15	688	74.6	9.45	112.3	89.7	103.7	98.4	96.9	97.2	123.7	81.5	96.7
PaLWMG0607143500.01.P01	35	19	35	7	616	66.1	7.9	108.2	90.7	102.3	100.4	105.9	101.6	126	81.9	82.9
PaLWMG0100095701.01.P01	61	4	21	4	89	9.5	5.81	77.5	130.4	69.3	74.1	77	75.8	58.8	183.5	153.7
PaLWMG0806622700.01.P01	54	14	29	14	374	40.9	7.97	88.7	94.5	99.7	100.5	99	103.1	97.2	113.1	104.1
PaLWMG0504613600.01.P01	24	3	19	3	214	21.6	8.92	91.4	86.9	98.2	106.3	103.3	104.9	102.4	112.5	94.2
PaLWMG0605626100.01.P01	35	12	31	10	393	45.1	6.81	96.2	93.2	102.2	102	102	100.1	102.3	97.7	104.3
PaLWMG0605287200.01.P01	51	13	28	8	358	37.8	8.22	109.7	121.6	103.5	105.3	105	108.3	84.1	76.5	86
PaLWMG0202424800.01.P01	43	27	39	27	644	73.4	4.72	112.4	90.4	107.6	92	91.4	90.6	120.3	87.2	108.1
PaLWMG0202081900.01.P01	42	16	49	16	374	40.6	8.46	105.5	102.6	103.8	102.1	102.3	102.4	98.4	86.8	96.2
PaLWMG0806850000.01.P01	29	14	41	14	824	88	5.69	95.4	172.6	85.6	111.1	109.2	107.9	54	85.6	78.6
PaLWMG0202330500.01.P02	46	25	46	25	587	64.3	8.85	121.4	85	114.7	98.8	97.1	93.4	116.7	82.4	90.4
PaLWMG0101428800.01.P02	28	23	31	23	1035	114.7	6.21	106	103.8	108.4	95.6	95	90.9	93.3	98.5	108.5
PaLWMG0201826900.01.P01	86	5	24	5	98	10.2	4.97	80	94.7	98	101	99.2	98.1	98.4	124.2	106.4
PaLWMG0100781700.01.P02	53	16	40	9	286	31.4	5.44	104.8	116.8	101.3	97.1	98.5	99.1	96.3	86.2	99.9
PaLWMG0807226100.01.P01	44	20	42	7	503	57.5	7.81	113.2	109.6	100.3	105.4	105	104.8	86.5	80	95.1
PaLWMG0504289900.01.P01	46	9	28	9	254	26.9	6.04	95.4	94	101.8	97.6	99.7	100.6	104	103.5	103.4
PaLWMG0605092800.01.P01	51	19	33	19	433	48.1	7.81	95.3	94.9	101.1	95.4	95.3	96.3	107.6	105.7	108.4
PaLWMG0605604300.01.P01	35	7	22	7	288	31.7	5.6	87	89.4	95.7	96.1	94.3	99	83.1	125.8	129.6
PaLWMG0706011000.01.P02	39	20	37	20	605	66.8	8.51	105.8	82.7	102.6	94.3	94	93.2	147.8	88.6	91
PaLWMG0201499900.01.P01	54	17	49	10	233	26.1	10.2	101.3	85.1	81.5	120.8	124.9	127.9	114	72.6	71.9
PaLWMG0806849800.01.P01	42	14	26	2	521	55.8	4.68	75.3	82.5	82.5	89.1	84.2	88.4	141.5	131.8	124.7
PaLWMG0605133300.01.P01	45	15	37	15	391	43.7	7.12	103.5	102.1	101.1	99.7	99	105	96.7	92.3	100.6
PaLWMG0504583500.01.P01	22	4	22	4	283	29.9	8.69	107.2	96.1	106.3	99.4	100.5	99.1	116.6	84.5	90.3
PaLWMG0302501400.01.P01	54	22	51	4	416	44.3	6.67	88.3	88.3	94.6	116	114.1	120.7	71.1	106.5	100.4
PaLWMG0100163400.01.P01	46	11	61	11	206	23.5	10.35	104.1	84	93.7	101.1	100.5	99.8	111.4	107.8	97.6
PaLWMG0100132000.01.P01	57	12	50	12	213	23.6	9.7	81.1	77.2	92.1	104.1	102.1	105.3	110.7	123.8	103.7
PaLWMG0101230600.01.P04	41	10	24	10	317	34.8	5.53	103.5	121.2	106.5	99.2	98.6	99.4	82.5	88.4	100.7
PaLWMG0303548000.01.P01	53	7	24	1	137	15.1	5.57	78.3	72.7	86.9	98.9	93	91	77.8	149.6	151.8
PaLWMG0302439400.01.P01	49	17	32	17	376	42.5	5.78	103.1	105.8	102.5	95.6	98.2	99.5	90.7	99.1	105.5
PaLWMG0605108400.01.P01	32	15	29	15	565	62.4	6.43	106.6	101.1	104.9	94	96.2	96.7	89.6	100.2	110.6
PaLWMG0201517000.01.P01	38	17	38	17	547	61.7	6.62	110.6	118.2	98.4	106.8	106	108.2	101.6	70.3	79.9
PaLWMG0100808000.01.P01	88	14	38	7	159	17.3	5.99	87.1	86	99.7	95.6	96.7	96	130	111.5	97.4
PaLWMG0202235700.01.P01	36	6	20	6	253	28.1	4.81	83.8	81	88.2	101.9	102.7	102.4	80	139	120.9
PaLWMG0202579500.01.P01	40	11	29	11	349	37.9	9.22	92.4	102.5	100	102.2	102.9	101.8	81.5	109.6	107.1
PaLWMG0706089900.01.P01	30	17	32	17	630	69	5.67	95	89.1	107.4	100.1	99.3	98.5	96.7	106.9	107
PaLWMG0404011200.01.P01	49	15	33	15	392	44.4	8.38	109.6	92.2	108.7	91.9	92.6	94.4	120	88.2	102.5
PaLWMG0705718800.01.P01	39	27	51	27	724	78.6	9.36	122.2	136.5	105	103	104	101.9	81	63.9	82.5
PaLWMG0100981000.01.P01	36	13	21	13	493	52.9	5.49	104.1	96.7	101.6	92.8	96.1	95.9	100.9	97	115
PaLWMG0303156500.01.P02	71	12	32	5	202	22.5	6.57	96.8	136.8	83.8	101.5	107.7	107.1	57.9	97.1	111.3
PaLWMG0705798500.01.P01	47	11	28	11	374	39.8	6.24	106.3	121.3	101.3	103.8	100.9	100.9	75	88.3	102.2
PaLWMG0706002000.01.P01	6	6	25	1	1032	115.4	6.83	93	86.6	142.3	104.5	116.3	97.3	94.7	74.4	91.1
PaLWMG0608299600.01.P01	41	8	37	3	187	20.9	10.98	114.7	89.3	87.8	122.1	121.3	123.1	106.7	66.8	68.1
PaLWMG0504612300.01.P01	47	16	37	16	323	35.2	9.04	112.5	105.6	104.8	93.1	94.8	92.9	112.9	85.5	98
PaLWMG0302968200.01.P01	25	17	31	6	766	80.3	5.57	113.6	130.2	96.9	105	101.7	102.5	142.8	56.2	51.1
PaLWMG0405491600.01.P02	43	12	48	4	278	31.4	5.57	103.8	90.9	94	91.3	95	91.3	186.5	70.9	76.3
PaLWMG0202415800.01.P02	28	29	39	29	1077	123.6	5.76	125.8	99.4	98.7	94.2	94	93.9	146.9	68.5	78.6
PaLWMG0101331800.01.P01	34	11	33	1	376	40.8	7.66	70.7	138	80.2	84.2	86	93.2	47.4	156.1	144.2
PaLWMG0809684600.01.P01	41	8	36	3	187	20.8	10.98	111.6	84.8	85.2	120.6	120.2	119.9	109	76.5	72.2
PaLWMG0706022900.01.P02	38	5	18	4	133	14.9	5.53	85.7	87.6	97.3	98.6	100.2	100.8	81.9	131.1	116.9
PaLWMG0201940900.01.P01	22	14	30	14	739	73.7	4.82	91.2	87.8	102.8	101.8	94.8	92.8	91	125.7	112
PaLWMG0202323000.01.P01	61	8	37	3	122	13.7	9.63	82.5	77.2	95.1	96.9	99.2	99	168.2	96.7	85.2
PaLWMG0604848600.01.P02	30	12	26	12	457	50.7	5.57	104.2	100.1	106.7	97.5	97.2	100	96.1	91.6	106.5
PaLWMG0100781900.01.P02	37	11	43	8	276	29.8	7.68	101.1	106.2	94.5	107.3	111.5	112.7	93.4	80.8	92.4
PaLWMG0706071500.01.P01	39	11	34	7	392	41.6	8.06	92.2	91.3	93.8	94.7	98.9	102.8	72.9	125.7	127.7
PaLWMG0504423300.01.P04	62	14	28	14	268	31.1	5	94.6	88.9	102	96.5	95.3	95.4	134.1	96.4	96.8
PaLWMG0504309500.01.P02	25	12	29	12	536	59.8	9.16	90.7	93.8	100.9	98.8	101.8	102.7	94.1	111.7	105.5
PaLWMG0202295700.01.P01	46	15	35	11	411	44.8	6.8	106.4	125.2	99.2	94.4	96.4	100.4	64.4	97.7	115.8
PaLWMG0605543400.01.P01	47	22	35	22	465	53.4	5.92	101.7	84.6	95.8	100.3	102.1	102.4	124.1	97.3	91.7
PaLWMG0202208800.01.P01	47	10	31	10	240	27.1	9.5	77.7	82.3	96.5	97.7	97.5	99.1	100.5	131.5	117.3
PaLWMG0604946700.01.P01	56	13	30	13	294	32.2	8.9	95.8	88.9	100.7	100.8	98.5	98.2	105.8	108	103.3
PaLWMG0705737800.01.P01	44	13	34	10	360	39.6	7.33	101.8	96.2	96	111.6	109.6	108.3	105.2	86.2	85
PaLWMG0100925500.01.P01	68	18	41	18	326	35.9	7.34	95.1	88.8	103.7	98.5	97	96.7	107.2	105.4	107.7
PaLWMG0302769300.01.P01	55	19	37	18	387	43.3	5.47	113.5	106.4	101.9	100.4	102.6	103.6	121.5	71.4	78.7
PaLWMG0100322300.01.P02	33	12	28	12	384	41	5.55	112.6	101.7	106.1	98.7	95.6	96.1	102.9	87.2	99.1
PaLWMG0404070300.01.P02	23	18	32	8	879	95.5	6.8	127.8	102.2	111.3	91.4	94.2	91.2	123.3	71.1	87.5
PaLWMG0604929800.01.P01	30	17	30	15	751	82	7.18	101	117.5	101.2	102.4	101.5	100.6	71.3	102.7	101.8
PaLWMG0807000500.01.P01	38	13	25	1	521	55.9	4.7	87.7	97.6	99.6	98.6	98.2	101.1	48.6	136.5	132.1
PaLWMG0202204300.01.P03	34	16	28	3	542	61.4	7.88	102.8	103.2	101.5	134.2	128.7	130.3	68.9	60.2	70.1
PaLWMG0302499500.01.P02	51	14	32	14	337	36.3	8.37	129.5	94.5	109.9	104.7	100.9	99.6	109.7	71.9	79.1
PaLWMG0202373900.01.P02	34	17	36	14	576	63.5	7.59	111.7	103	97.3	96.5	100.8	95.9	131.3	73.9	89.5
PaLWMG0605306000.01.P01	57	14	35	14	276	29.5	8.81	99	109.9	90.4	107.8	113.9	117	85.1	82.1	94.8
PaLWMG0101082800.01.P01	28	16	29	15	584	62.5	5.15	92.5	100	99.9	94.1	95.9	95.9	84.6	119.2	117.9
PaLWMG0705857800.01.P01	39	9	33	9	249	27.1	7.96	98.8	90.4	103.3	94.5	98.1	96.2	94.3	115.6	108.8
PaLWMG0100222800.01.P01	38	16	27	15	512	54.4	5.25	95.2	85.8	107.6	100.7	96.5	95.5	98.2	110.3	110.2
PaLWMG0201992500.01.P01	33	15	42	15	524	55.7	7.97	113.2	98.4	106.6	97.7	98	99.5	111.4	85.6	89.6
PaLWMG0302544500.01.P02	32	14	29	14	522	56.2	7.01	117.5	108.9	93.1	106.3	107.6	107.1	120.9	66.4	72.1
PaLWMG0504370600.01.P02	28	12	31	8	452	48.5	6.95	101	90.2	111.8	109	102.9	103	55.8	111.3	115.1
PaLWMG0100247000.01.P01	46	7	31	4	191	21.9	9.83	93.8	88	108.6	100.2	100.4	101.8	103.8	104.1	99.3
PaLWMG0708951300.01.P01	52	11	33	6	216	24.5	9.98	93.3	82.5	94.4	106.6	103.8	105.1	95.4	121.3	97.6
PaLWMG0504311400.01.P01	34	20	39	20	704	77.7	5.53	117.7	84.5	96.8	96.3	98.1	97.9	150.8	75.1	82.8
PaLWMG0100352500.01.P01	18	1	14	1	82	9.2	7.28	76.7	101.3	90.2	109.1	105.9	116.1	62.6	115.5	122.7
PaLWMG0202407900.01.P01	50	18	29	18	406	44.4	8.31	110.8	108.4	98.7	103	102.9	105.1	90.2	80.1	100.8
PaLWMG0303252900.01.P01	44	6	30	3	190	21.9	9.77	108.8	92.5	99.3	102.8	104.4	99	108.1	88.6	96.5
PaLWMG0604771600.01.P01	28	17	34	17	704	77.1	7.18	103.6	77.9	99.6	106.1	102.3	103.1	127.6	91.6	88.1
PaLWMG0605097900.01.P01	22	2	14	2	137	14.5	5.47	83.3	85.7	101.3	105.9	100.6	103.1	98.4	115.8	105.9
PaLWMG0504203900.01.P01	41	12	28	12	353	37.7	4.69	92.4	93.4	103.4	96.6	97.6	96.3	90.6	116.2	113.5
PaLWMG0806909600.01.P01	50	17	31	17	310	34.9	7.91	123.6	141	97.9	110.2	107.8	110.3	64.5	62.9	81.8
PaLWMG0705865900.01.P01	32	12	36	12	371	41.6	6.96	106.2	113.6	99.3	103.6	103.6	105.2	82.6	89.2	96.7
PaLWMG0806611600.01.P03	41	16	43	16	399	43.6	9.35	107.3	92.8	103.2	94.7	100.2	101.7	107	97	96.2
PaLWMG0302502200.01.P01	57	18	44	1	323	34.4	6.06	95.6	84.7	97.2	88.2	84.6	89.4	120.4	113.3	126.8
PaLWMG0101159500.01.P01	24	21	32	21	992	109	6.16	107.5	130.7	106.5	104.5	105.2	104.6	71.8	82.2	87
PaLWMG0806808100.01.P01	34	13	40	12	416	46.1	9.42	79.3	85.6	85.4	94	105.4	109.9	95.6	128.2	116.6
PaLWMG0100776400.01.P01	37	11	23	11	443	48.9	5.48	86.3	84.1	93.7	101.7	98.1	101.8	90.1	125.7	118.6
PaLWMG0705675300.01.P01	23	11	32	10	542	59.8	8.44	98.5	125.6	99.2	88.9	92.8	94.6	64.6	120.9	114.9
PaLWMG0705773600.01.P01	42	15	33	12	464	51	6.04	96.8	89.5	99.7	98.2	97	99.9	124.9	95.9	98.1
PaLWMG0100344400.01.P01	38	18	37	10	455	50.6	7.46	92.3	117.4	80.4	92.6	92.8	95.7	70.6	126.6	131.6
PaLWMG0101436300.01.P01	42	18	46	7	389	44.3	10.13	108.8	97.6	88.3	103.9	101.7	102.7	113.1	93.4	90.5
PaLWMG0605479600.01.P01	22	7	26	7	364	38.2	8.25	102.3	98.7	108.7	99.9	100	102	77.2	108	103.3
PaLWMG0302788700.01.P01	44	21	35	17	632	66.7	7.34	127.5	102.9	104.3	98.5	100.4	98.2	104.5	77.2	86.7
PaLWMG0100550000.01.P01	52	16	33	2	343	37.5	6.37	110.7	109.3	118.8	105.9	101.5	98.5	77.8	94.3	83.2
PaLWMG0100246800.01.P01	42	11	33	10	276	29.5	8.75	105.4	100.9	100.7	102.7	103.3	106.9	101.1	86.6	92.5
PaLWMG0504233900.01.P01	27	3	21	3	165	17.6	5.16	74.4	82.2	85.6	112.9	112.5	109.9	106.8	112.8	102.8
PaLWMG0504436000.01.P01	59	16	33	16	327	37.4	6.54	93.8	88.1	98.5	100.8	101	107.8	93.6	109.2	107.2
PaLWMG0605619600.01.P01	42	12	32	12	299	33.9	5.8	90	91.3	94.6	97.7	96.5	96.9	82.7	130.2	120
PaLWMG0100965000.01.P01	60	12	36	12	221	24.9	6.79	91.8	96.5	96.9	102.4	103.9	106.2	88.1	112.7	101.3
PaLWMG0202407500.01.P01	74	9	34	7	100	11.4	7.97	99.7	86	84.2	111.9	115.8	112.4	129.9	81.8	78.4
PaLWMG0101125600.01.P01	45	11	40	11	312	34.8	6.81	98.2	98.5	97.6	103.7	103.6	104.6	99.9	92.3	101.5
PaLWMG0605542800.01.P01	48	23	31	23	647	71.7	5.6	111.9	99.7	105.6	95.5	96.5	97.1	121.7	81.4	90.6
PaLWMG0605184700.01.P01	38	13	31	10	427	46.6	6.65	100.5	89.2	97.2	98.2	96.5	96.7	130.2	97.9	93.5
PaLWMG0806592900.01.P01	38	10	28	10	234	26.2	9.44	78.3	75.6	91.8	109.5	106.5	107.4	95.8	127.5	107.7
PaLWMG0202465600.01.P01	58	7	33	7	108	11.9	10.59	79.8	92	98.6	103.3	110.3	111.5	91	120.6	92.9
PaLWMG0706223000.01.P01	34	12	28	12	417	48.4	8.57	119	74.3	88.6	94.3	91.9	91	189.9	72.8	78.2
PaLWMG0705910000.01.P01	42	14	29	14	477	50.6	4.53	83.7	80.3	100.5	94.5	93.4	91.1	120.1	120.4	116
PaLWMG0504395800.01.P01	39	18	34	17	459	52.3	6.11	99.6	102.1	102.6	99.7	100.2	96.4	96.6	93.4	109.4
PaLWMG0806438400.01.P03	18	17	27	10	1268	138.2	6.23	87.5	95.4	100.9	99.8	99.2	94.1	86.2	122.9	114
PaLWMG0605413100.01.P03	48	5	29	3	112	12.8	10.7	106.6	90.1	98.3	103	103.5	105.6	100.2	99.8	93
PaLWMG0202267200.01.P01	22	16	28	16	841	90.8	7.96	91.9	84.9	102	97.7	99.2	95.2	110.8	112.2	106.1
PaLWMG0605082100.01.P01	81	9	32	7	113	11.4	4.49	74.6	77	100	101.6	92	90.6	75.8	164.1	124.4
PaLWMG0403517400.01.P01	37	10	33	10	406	44.7	5.74	88	76.4	100.5	109.5	109	109.6	120.6	95.6	90.8
PaLWMG0202414700.01.P05	21	20	34	14	1135	125.3	7.17	111.4	103.9	97.2	103.7	98.8	97.3	126.4	78.2	83.1
PaLWMG0806877700.01.P02	32	24	30	24	1049	113.4	4.81	84.1	91.4	101.3	102	95.6	93.9	94.3	120.6	116.8
PaLWMG0504254000.01.P01	72	14	31	3	207	22.9	7.9	88.3	164.6	83.8	117.5	119.1	123.7	50.4	72	80.6
PaLWMG0202135300.01.P01	34	13	35	13	432	47.7	7.02	104.3	105.6	95.1	103	103.3	102	109.8	83.7	93.3
PaLWMG0201791200.01.P01	48	10	26	6	182	19.7	9.39	92.8	88.3	105.5	96.1	87.9	91.4	120.2	111.2	106.6
PaLWMG0605110900.01.P01	48	16	24	16	458	50.4	5.83	116.4	96.4	93.1	97.6	99.6	98.5	157.3	65.7	75.4
PaLWMG0202035000.01.P01	39	16	32	16	500	57.1	8.29	116.7	96.6	101.4	94.9	96.1	93.1	132.6	78	90.5
PaLWMG0101138400.01.P02	32	15	35	12	614	67.7	7.31	122.3	94.8	100.2	102.3	102.2	104.1	116	76	82
PaLWMG0806680500.01.P02	33	11	32	11	443	49	5.87	101.3	107.4	100.6	99.6	97.1	99	88.1	99.5	107.4
PaLWMG0100994700.01.P01	55	7	33	7	133	14.3	5.54	93.7	91.6	98.4	109.1	104.3	107	95.8	106.7	93.4
PaLWMG0202185600.01.P01	26	16	30	16	776	87.4	6.19	102.5	84.7	105.1	94.8	94.3	92.1	135.2	91	100.3
PaLWMG0302479100.01.P01	60	11	24	4	210	23.1	7.9	92.4	97.5	90.5	101.2	108.9	110.5	116.2	89.7	93.2
PaLWMG0403821600.01.P01	25	14	44	5	544	61	8.5	82.9	154.8	124	82.8	86.3	90	35.4	125.9	118
PaLWMG0101298200.01.P01	45	13	27	13	283	31.3	5.45	78.7	77.6	97	103.1	99.7	99.3	100	133.4	111.1
PaLWMG0706077700.01.P03	34	12	28	2	325	37.1	10.05	99.7	73.8	69.3	140.1	133.9	142.1	166.4	38.5	36.4
PaLWMG0303070900.01.P01	25	27	42	16	1139	125.3	7.14	116	91.4	91.7	97.1	96.1	92.9	160	74.7	80
PaLWMG0706110600.01.P01	41	19	38	4	470	51.7	7.23	110.6	98.6	107.8	107.2	106.4	109.1	115.2	68.9	76.2
PaLWMG0605309600.01.P01	61	13	28	10	286	31.1	8.02	81	95.9	101	87.1	85.8	90.4	54.4	172.9	131.4
PaLWMG0705729300.01.P01	18	10	34	7	594	64.2	8.06	80.2	110.3	86.7	93	91.8	92.6	69.8	113.1	162.4
PaLWMG0605335900.01.P03	19	4	22	4	310	33.8	5.78	93.3	71.6	98.7	108.7	108.4	108.9	140.8	86	83.6
PaLWMG0403481300.01.P01	65	15	29	15	262	30.2	4.87	100.7	72	99.9	96.4	94.5	92.5	177.2	79.4	87.5
PaLWMG0403860100.01.P01	34	11	27	7	367	40.6	9.32	118.3	140.2	106.3	104.5	108.5	111	57.3	72.5	81.3
PaLWMG0202405100.01.P01	31	5	35	5	222	24.3	4.54	83.9	84.3	91.4	109.7	109	106.6	99.8	115.6	99.8
PaLWMG0807135500.01.P01	33	18	39	5	652	73.4	5.05	102.9	101.8	104.8	99	93.8	93.1	65	118.4	121.1
PaLWMG0605490900.01.P01	56	27	35	27	605	65.7	4.36	85.4	109	99.3	89.1	89.1	88.4	73.7	133	133
PaLWMG0100919500.01.P01	28	17	25	17	691	74.3	7.46	91.4	92.1	96.1	107.1	103.4	103.5	89.3	107.5	109.7
PaLWMG0403383700.01.P01	52	12	21	12	299	33.3	7.28	93.4	98.3	108	96.8	94.3	94.7	85	117.5	111.9
PaLWMG0202278300.01.P01	30	7	26	7	237	26.1	7.78	94.1	93.6	100.3	97.8	98.9	101.8	73.6	128	111.9
PaLWMG0705657000.01.P01	88	14	35	7	160	17.5	5.78	79.4	76.1	95.7	96.5	95.5	101.1	107.5	130.6	117.6
PaLWMG0202118100.01.P01	28	13	22	13	592	66.5	5.77	115.7	93.2	108.9	94.3	91.2	91.1	138.1	77.2	90.2
PaLWMG0100163800.01.P01	19	13	33	5	695	74.5	6.15	109.5	108.4	102.1	101.2	102.2	96.3	102.8	91.7	85.8
PaLWMG0404056700.01.P01	75	14	27	7	211	23.2	7.42	107.7	125.7	102	102.2	104	104.7	73.7	81.7	98.2
PaLWMG0100384300.01.P01	39	7	16	7	236	25.1	6.19	116.5	101	110.8	107.5	104.6	109.4	93.3	77.3	79.5
PaLWMG0302584100.01.P01	38	12	38	7	356	40.3	6.11	94	118.9	79.7	98.3	103.4	106.3	65.5	111.3	122.6
PaLWMG0604836300.01.P03	22	14	24	14	756	79.5	7.23	79.7	82.9	97.6	104.9	105.2	104.1	97.2	120.5	107.9
PaLWMG0302979400.01.P01	39	10	24	3	290	32	9.36	113.5	91.8	97.2	107	110.6	111.5	115.8	70.8	81.9
PaLWMG0304716000.01.P03	35	16	28	15	574	65.4	5.97	103.5	113.1	107.3	97.6	97.1	97.7	78.1	97.3	108.2
PaLWMG0806741900.01.P02	30	20	31	20	694	77.3	6.37	103.6	91.3	102.2	92.6	92	90.1	136.5	90.6	101.1
PaLWMG0201787700.01.P01	66	12	49	5	141	16.1	10.04	96.1	88.5	94.3	116.3	113.7	111	89.3	96.2	94.6
PaLWMG0100707300.01.P01	33	19	29	19	668	73.6	9.13	110.7	102.9	105.9	95.5	94.3	95.2	102	91.5	102
PaLWMG0806755500.01.P01	49	13	26	12	261	28.4	9.39	93.4	96.2	97.8	94.9	96.1	99.2	79.7	129.4	113.4
PaLWMG0705856400.01.P01	46	18	29	18	458	49.6	8.37	105.2	95.7	94.2	97.7	100.3	111.3	121	85	89.4
PaLWMG0202058700.01.P01	47	11	26	11	225	25.8	7.37	105.4	90.3	103.7	97	98.8	99.4	113.9	91.2	100.3
PaLWMG0806664800.01.P01	34	22	40	20	650	74.4	8.29	95.9	92.1	103.8	98.8	97.4	97.1	99.3	104.9	110.7
PaLWMG0302465900.01.P01	51	12	26	12	278	30.5	9.16	106.1	104.2	91.1	107.7	112.3	113.1	106.5	73.5	85.5
PaLWMG0806721300.01.P01	43	13	29	13	337	36.9	5.15	95.1	100.1	110	99.3	97.2	97	86.4	105.6	109.3
PaLWMG0101439400.01.P01	48	13	38	6	288	32.6	6.6	88.1	93.7	100.2	94.3	97.6	98	107.1	109.8	111.2
PaLWMG0100982900.01.P01	36	18	39	18	486	53.2	6.55	87.6	91.7	97.5	94.1	94.5	94.8	89.2	131.4	119.2
PaLWMG0806752400.01.P01	53	11	21	6	295	31.3	7.27	96.5	74.7	95.7	100.3	103.4	105.7	157.7	80.8	85.3
PaLWMG0504482500.01.P05	27	16	25	9	787	86.3	6.98	110.3	99.3	115.1	92.1	88.3	88.1	114	88.5	104.5
PaLWMG0705995900.01.P01	44	16	28	16	481	50.8	6.21	103.6	90.1	99.4	101.8	101.5	101.6	129.8	83.2	89.1
PaLWMG0604983300.01.P01	62	13	31	3	216	23.9	8.24	97	113	93.9	104.3	109	106.7	91.5	94.8	89.6
PaLWMG0605588500.01.P01	27	12	23	12	638	69.2	6.73	104.8	103.9	100.1	99.8	100.5	95.4	108.1	90.1	97.4
PaLWMG0504554300.01.P01	23	26	35	26	1170	129.8	5.69	107.2	109.3	105.6	100.6	100.1	98	109.6	81.1	88.6
PaLWMG0605537600.01.P01	19	18	38	2	959	109.5	6.89	110.9	117.5	104.8	104.8	106.8	108.1	87.8	77.5	81.7
PaLWMG0100062100.01.P02	27	14	31	14	523	56.6	6.76	108.5	95.7	97.1	101.4	102.8	102.1	133.9	77.2	81.2
PaLWMG0100237500.01.P03	31	27	41	27	979	109.7	6.28	107	127.7	97.1	98.7	103.7	104.3	97.1	78.1	86.3
PaLWMG0404032700.01.P01	33	15	26	15	537	60.6	6.87	95	80	105.5	95.8	92.1	90.3	121.5	109.1	110.6
PaLWMG0504560500.01.P01	39	12	27	5	284	31.3	6.32	103.7	117.7	98.3	101.7	99.9	101.1	73.2	99.8	104.7
PaLWMG0706255800.01.P01	50	11	37	9	277	30.9	8.32	108.5	91.2	104.2	106.8	103	100.9	117.9	84.9	82.6
PaLWMG0806433600.01.P03	44	14	39	10	316	35.9	10.4	77.4	83.3	87.5	107.6	110.3	94.4	92.3	132.6	114.7
PaLWMG0705704100.01.P02	44	13	29	13	328	36.7	9.98	85.2	93.6	98.8	104.8	104.2	101.8	88.3	118.6	104.7
PaLWMG0604829300.01.P03	16	18	27	18	1404	153.1	5.6	115	109.1	111.5	97	94.9	95.7	99.7	81.3	95.6
PaLWMG0480000641.01.P01	58	15	35	15	314	33.9	5.26	112.3	104.6	111.2	98.3	96.7	97.7	100.1	86.8	92.3
PaLWMG0201985500.01.P01	49	14	36	14	338	37	6	94.9	85.1	102.4	103.3	101.8	101.8	97.9	107	105.8
PaLWMG0806653100.01.P01	41	19	40	19	479	53.4	5.11	118.2	97.3	90.6	107.5	105.3	107.1	135.9	68.3	69.7
PaLWMG0100950300.01.P01	39	14	29	14	433	48	5.63	91.2	87.8	94.7	107.7	105.1	105	118.7	94.5	95.5
PaLWMG0100466700.01.P02	29	25	38	25	1033	118.5	4.96	104.3	96.4	103.7	97.1	97.7	96.4	113.9	91.4	99.1
PaLWMG0203130100.01.P01	62	8	34	8	130	14.8	9.89	98.3	86.7	89	108.7	110.2	110.2	114.2	92.6	90
PaLWMG0302463900.01.P01	41	9	25	9	307	33.6	6.8	96.7	109.9	95	101.1	104.8	111.6	88.2	97.4	95.4
PaLWMG0101149900.01.P02	36	16	35	16	543	63.6	6.58	116	103.6	99.8	97.1	95	95.8	133.2	77.8	81.8
PaLWMG0806646000.01.P01	30	12	33	12	461	49.4	5.34	97.4	85.7	99.1	98.2	98	98.3	99.6	119.5	104.2
PaLWMG0202270200.01.P02	43	8	19	8	235	27.1	4.86	93.2	95.4	98.2	99.4	97.1	94.6	121.4	100.9	99.9
PaLWMG0604923100.01.P01	34	9	27	9	299	32.7	5.31	78.9	72.3	101.3	106.7	106	103.4	104.8	123	103.7
PaLWMG0303547600.01.P01	56	17	42	1	323	34.4	6.06	100.9	107.2	93.6	112	107.8	109.8	69.8	96.2	102.7
PaLWMG0403477500.01.P01	43	10	20	10	419	43.9	7.85	103.8	87.7	100	104	102.8	104.6	138.8	73.4	84.9
PaLWMG0806820700.01.P01	45	14	24	9	427	47.3	5.43	93.4	94.6	101.5	122.1	121.3	124.6	56.5	91.3	94.9
PaLWMG0101414900.01.P01	54	8	21	8	137	14.3	5.17	87.7	98.3	103.6	95	90.6	88.9	47.3	161.5	127.1
PaLWMG0504401400.01.P01	54	13	29	8	230	26.2	7.49	111.9	107.2	102.6	94.6	102.4	100.3	86.9	94.4	99.7
PaLWMG0604835800.01.P01	60	11	26	11	202	22.8	5.76	103.9	104.3	97.6	105.6	110	110.2	93.2	84	91.2
PaLWMG0303084000.01.P02	65	15	29	14	298	32.3	4.88	73.9	86.3	94.6	101.2	101.4	100.7	79.6	142	120.3
PaLWMG0504608800.01.P01	52	8	45	4	143	16	10.24	77.2	86.7	96.1	102.9	105.6	105.8	79.4	135	111.4
PaLWMG0504247800.01.P01	49	23	35	21	612	69.2	8.21	122	100.3	106.1	96	97.5	97.5	115.2	76.2	89.2
PaLWMG0100697400.01.P02	43	9	25	9	273	29.2	6.3	105.2	100.2	104.4	98.4	97.2	100.4	95.8	98.5	99.9
PaLWMG0605445600.01.P01	36	16	27	13	422	46.7	4.98	116.4	106.1	107.9	100.9	98.9	95.9	111.4	76.7	85.6
PaLWMG0202425200.01.P02	35	15	29	15	452	51.4	7.42	113.9	113.6	104.1	95.9	97.3	96	87.1	90.3	101.7
PaLWMG0100943600.01.P01	52	14	35	14	286	30.8	5.41	94.5	77.8	94.5	100.6	102	99.7	141.1	96.4	93.5
PaLWMG0403895700.01.P01	56	12	32	6	218	24	5.25	97.2	106.2	91.3	112.3	111.7	113.3	104.5	81.1	82.3
PaLWMG0202161900.01.P05	21	19	27	19	1068	118.8	5.83	112.4	107.4	108	96.8	97.8	98.7	99.7	80.4	98.9
PaLWMG0403663100.01.P01	47	17	28	17	442	48.5	5.27	99.4	89.8	96.5	98.3	97.8	96.2	133.2	93.7	95.3
PaLWMG0302441000.01.P01	25	3	22	3	219	23.7	7.72	91.7	88.9	100.6	96.6	96.7	102.2	82.9	124.8	115.6
PaLWMG0605458100.01.P01	49	11	20	9	324	34.1	8.53	81	94.8	96.9	89.1	89.8	90.8	60	150.1	147.6
PaLWMG0705789500.01.P01	42	12	33	12	338	36.9	7.68	92.8	123.8	114.2	86.6	86.7	89.9	55.5	137.2	113.2
PaLWMG0100912800.01.P01	33	21	36	16	623	68.9	8.47	98.5	87.1	106.3	97.1	94.9	92.4	110.2	101.7	111.8
PaLWMG0403288800.01.P01	50	4	16	2	103	11	4.63	102.3	85.2	97.3	97.5	95.7	95.7	152.2	87.6	86.6
PaLWMG0201603900.01.P02	21	14	36	1	697	78.3	5.88	132.6	99.2	109.6	87	81.1	85.5	89.8	91.2	123.9
PaLWMG0605130900.01.P04	35	10	20	8	253	28.1	9.91	97.9	92.2	100.9	96	94.5	94	122.5	98.2	103.7
PaLWMG0810730600.01.P02	38	11	24	11	340	37.1	6.62	103	149	95.8	108.6	110	113.2	59.6	76.2	84.6
PaLWMG0504228300.01.P01	26	7	24	7	338	37.2	5.19	105.9	103.8	109.4	93.7	95.9	92.9	86.5	101.1	110.7
PaLWMG0202015000.01.P01	30	9	20	9	381	42.7	5.15	103.9	97.7	104.9	99.6	98.9	98.2	91.5	96.8	108.6
PaLWMG0101065300.01.P02	27	11	26	7	515	57.6	5.29	110.2	122.7	100.8	101.9	102.3	103	112.6	71.5	75
PaLWMG0202335000.01.P01	26	11	25	11	499	54	8.16	105.2	119.5	104.3	93.3	96.5	98.7	74	97.9	110.7
PaLWMG0202088800.01.P01	38	15	26	14	473	52.6	6.67	134.1	105.1	109	110.6	109.1	112.1	52.3	77.4	90.3
PaLWMG0201894700.01.P01	59	17	36	11	329	36.4	6.46	95.8	98.3	100.5	95.8	96	96.9	94.1	107	115.5
PaLWMG0201932100.01.P01	28	19	32	6	801	90	6.74	116	105.1	104	101.8	90.8	94.8	133.6	70.1	83.9
PaLWMG0303141600.01.P01	36	13	23	11	497	53.5	6.6	102.7	125.1	95	103.5	101.2	102.1	70.3	89.4	110.7
PaLWMG0101047100.01.P01	38	5	20	5	165	18.4	9.66	80.4	87.7	98.1	103.4	103.6	101.3	84	135.9	105.6
PaLWMG0403480900.01.P01	36	11	34	11	339	37.1	6.98	87.8	98.2	102.1	97.1	94.9	94.6	72.9	133.8	118.5
PaLWMG0806595000.01.P01	35	13	30	13	474	51.9	7.02	115.5	123	100.4	104.7	106.7	106.7	107.7	64.2	71
PaLWMG0303277100.01.P01	29	17	28	17	730	82.7	7.11	103.3	97.4	93	99.4	99.9	99.4	130	84	93.6
PaLWMG0605596300.01.P02	38	16	22	13	539	62	4.98	109.3	114.2	104.5	99.3	96.5	95.1	101.2	85.7	94.2
PaLWMG0405947200.01.P02	27	22	36	22	772	84.9	5.31	97.4	89.2	105	95.5	96	93.8	126.1	95	102
PaLWMG0201616900.01.P01	50	15	36	4	361	39.6	5.14	106.3	93.3	107.9	91.8	87	87	98.2	103.6	124.7
PaLWMG0101135300.01.P01	53	6	22	3	131	14.1	4.84	101.7	98.9	105.5	102.4	101.8	100	90.2	101.9	97.5
PaLWMG0303062200.01.P02	34	24	38	23	635	74.1	5.67	97.2	87.3	105.7	99.6	94.3	94.2	110	102.7	109.1
PaLWMG0100296400.01.P02	32	11	33	7	424	46.8	5.12	111.3	111.2	105.6	99.9	100.9	102.8	105.8	73.1	89.5
PaLWMG0404016500.01.P01	32	10	20	10	376	41.4	7.17	99.8	83	94.9	95.8	96.2	92	185.3	75.4	77.7
PaLWMG0302467400.01.P01	46	21	43	20	516	59.2	6.55	104.5	107.6	106.2	100.9	99.7	99.2	86	91.4	104.4
PaLWMG0605204900.01.P01	48	12	38	2	233	26	10.08	107.8	102.8	100.2	128.5	130.7	125.6	67.6	67	69.8
PaLWMG0504548300.01.P01	38	11	21	11	359	38.7	5.96	113.8	117	99.9	107	105.4	105.1	109.8	67.8	74.3
PaLWMG0302483000.01.P01	23	18	27	18	913	100.6	4.96	111.7	103.8	109.3	94.3	94.4	91.2	114.3	84.3	96.6
PaLWMG0100649800.01.P02	30	12	30	5	436	49.1	5.72	121.7	110.2	106.4	100.5	98.9	99.9	114.8	69.2	78.2
PaLWMG0706044900.01.P04	34	16	30	16	425	47.9	6.27	107.5	169	116.4	101.4	104.1	105.8	55.3	62.3	78.2
PaLWMG0100330100.01.P01	81	9	22	8	159	17.6	5.97	71.7	59.3	71	92.7	94.2	93.1	67.8	167.5	182.9
PaLWMG0705761800.01.P01	38	10	24	10	303	34	8.25	94.8	93.3	100.8	99.5	99.7	100.9	85.4	120.8	104.8
PaLWMG0101214500.01.P01	28	10	26	10	288	32.4	9.04	73.5	86.9	89.3	111.8	109.4	108.5	73.6	131	116.2
PaLWMG0403632600.01.P02	46	7	24	3	153	17.5	8.12	92.3	91.8	93.7	108.2	109.1	111.8	89.4	106.5	97.1
PaLWMG0480000598.01.P01	44	6	30	1	149	16.5	10.35	105.4	77.2	89.8	122.7	115.6	120.5	106	86.4	76.6
PaLWMG0504217000.01.P02	19	19	27	18	1283	141	8.82	100.1	115.3	100.6	107	108.1	105.5	85.8	85.9	91.7
PaLWMG0403892600.01.P01	27	17	23	14	854	96.4	6.24	106	119.8	106.6	99.8	100.8	100.9	99.9	77.8	88.5
PaLWMG0806652900.01.P01	41	5	25	5	150	16.1	7.94	86.6	94.4	99.6	100.1	98.1	97.4	80.2	131.3	112.3
PaLWMG0100023500.01.P01	62	20	39	13	284	32.5	8.12	205.9	71.3	123.2	105.2	101.9	100.9	77.6	57.5	56.4
PaLWMG0100796700.01.P01	43	9	25	9	227	25.5	5.17	76.2	95.1	85.3	86.8	83.7	84.7	61.7	184.8	141.9
PaLWMG0706324200.01.P01	58	13	26	1	310	32.9	5.27	83.6	110.8	113.2	108.7	117.1	90.4	53.8	114.3	108.1
PaLWMG0504536200.01.P01	40	15	27	15	473	51.3	6.76	114.4	111.1	106.9	95.8	97.2	96.9	107.5	75.9	94.3
PaLWMG0706298100.01.P01	44	20	33	9	549	63.9	6.16	118.2	96.3	103.5	98.7	97.7	99.1	117.1	80.1	89.3
PaLWMG0605364700.01.P01	37	13	36	13	363	39	6.35	105.3	98.3	109.8	97.8	95.3	94.4	92.9	99.5	106.8
PaLWMG0403912300.01.P01	67	10	31	6	176	19.7	6.52	80.2	91.7	67.7	82	83.7	83	62.4	187.7	161.7
PaLWMG0708520300.01.P02	16	20	35	8	1315	142.9	7.31	118	108.8	105.4	92.9	95.5	93.2	107.1	88	91.2
PaLWMG0201949700.01.P01	47	9	27	8	240	26.4	8.05	90.6	91.1	97.7	98.9	96.8	96.9	106.4	117.9	103.8
PaLWMG0100817100.01.P01	61	13	43	10	263	29.9	4.97	90.6	114.4	74.6	102.1	105.4	109.2	65.5	117.3	120.9
PaLWMG0604909700.01.P02	25	13	30	9	588	66	6.49	117.2	117.9	108.8	103.9	105.3	104	65.9	85.2	91.8
PaLWMG0806959300.01.P02	29	13	31	8	469	50.8	8.15	109	91.3	110.7	87	88.5	90	123	94.3	106.2
PaLWMG0202332500.01.P01	23	14	35	14	781	84.2	8.69	96	93.9	92.8	105.2	105.3	104.5	91.7	106.2	104.5
PaLWMG0806621800.01.P01	38	4	13	4	149	15.7	9.88	83.5	72.8	93	115.9	113.8	113.8	129.8	97.7	79.9
PaLWMG0504383800.01.P01	30	18	29	18	701	77.7	5.03	113.1	109.2	110	99.5	96.8	95	109.5	80	86.9
PaLWMG0504742700.01.P06	30	15	21	15	594	61.6	6.23	114.2	113.7	109.4	96.6	96.2	95.8	92.8	82.6	98.6
PaLWMG0100615700.01.P01	29	16	26	16	733	81.9	8.07	106	100.3	100	99	96.9	98.3	99.3	97.8	102.3
PaLWMG0100269800.01.P01	67	8	42	1	112	12.3	9.58	99.5	77.6	91.5	112	108.3	109.3	150.8	78.4	72.5
PaLWMG0807046100.01.P01	38	8	33	8	237	25.5	4.53	80.1	87	99.8	105.3	102.3	100.6	95.7	121.8	107.4
PaLWMG0100388800.01.P01	68	11	31	3	145	16.5	10.2	106.6	86.4	88.9	102.9	110	111.4	104.3	100.2	89.2
PaLWMG0101471100.01.P01	30	14	20	14	678	74.6	9.11	92	95.7	98.3	98.8	99.4	100.4	98.6	107.9	108.9
PaLWMG0604869600.01.P01	47	11	34	2	221	25	10.35	103.5	79.5	88.3	109.5	103.3	99.1	155.8	75.6	85.3
PaLWMG0404052500.01.P01	17	24	33	24	1665	187.6	6.35	112.3	90	104.3	90.4	90.6	88.9	150.7	78.2	94.7
PaLWMG0806815100.01.P01	68	11	29	3	145	16.5	10.24	94.3	89	74.6	104.2	110.7	113	159.8	76.3	78.1
PaLWMG0100903700.01.P01	25	14	26	14	604	66.2	8.95	107	111.1	102.2	98.9	96.2	98.2	89.6	97.4	99.4
PaLWMG0403403000.01.P01	27	20	31	20	865	98.1	5.36	114.6	92.1	104	94.9	92.2	90.5	140.7	83.1	88
PaLWMG0101294700.01.P01	29	7	19	4	332	35.1	9.36	100.4	100.2	116.1	109.6	117.2	116.6	78.8	84.2	76.9
PaLWMG0806386000.01.P01	40	12	20	12	435	48.4	6.79	104	125.3	108.3	99.8	104.6	106.5	65	87.4	99.1
PaLWMG0403644200.01.P01	43	9	30	3	217	24	6.57	106.6	92.5	87.8	110.4	105.2	107.1	130.3	70.2	89.9
PaLWMG0302513500.01.P01	49	12	24	12	326	36.1	7.91	87	96.8	100.7	95	92.6	92.8	78.2	135.8	121.2
PaLWMG0201821500.01.P01	28	10	24	10	419	46.1	6.62	127.2	119.4	112.9	100.1	99.5	98.8	87.8	71.1	83.3
PaLWMG0806747100.01.P01	29	14	23	11	571	65.4	6.67	109.2	101.3	109.3	98.4	97.2	94.3	101.6	88.9	99.8
PaLWMG0202189800.01.P03	21	13	21	13	797	90.1	5	102.8	102	105.9	97.1	95.9	95	91.5	99.2	110.7
PaLWMG0806551500.01.P01	50	14	28	14	319	35.1	6.07	105.5	87.6	104.9	98.6	96.6	96.2	128.4	89.1	93.1
PaLWMG0706128200.01.P01	25	4	15	4	245	25.6	4.84	80.8	126.9	118.7	77.9	73.2	73.5	45.9	196.1	107.1
PaLWMG0100954000.01.P01	48	5	31	5	131	14.3	10.42	88.6	83.3	89.7	104.8	107.3	103.8	112.5	110	99.9
PaLWMG0101157600.01.P01	36	19	44	19	448	50.8	9.48	113.5	95.7	100.8	101	99.8	98.1	101	93.4	96.7
PaLWMG0806628100.01.P01	52	11	24	11	306	32.5	6.77	102.3	100.6	108.1	96.8	94	94.7	87.3	107.6	108.7
PaLWMG0806786000.01.P01	38	9	21	9	309	34.4	7.27	97.5	90.4	93.2	107.2	108.7	107.3	113.8	87.4	94.5
PaLWMG0202107600.01.P01	32	13	27	13	449	47	5.26	104.5	82.4	113.2	100.4	100.1	97.7	123.7	86.8	91.3
PaLWMG0605465500.01.P01	47	5	36	4	123	12.5	8.54	86.6	105.6	112.4	103.3	93.4	103.7	52.9	148.6	93.4
PaLWMG0100757100.01.P01	39	25	36	22	724	83	7.53	114.5	112.6	94.5	99.2	100.2	104.9	131.2	70.7	72.1
PaLWMG0201604500.01.P01	25	12	24	3	595	67.2	5.72	115.5	101.8	101.7	98.2	97	94	105.5	81.4	104.8
PaLWMG0101439200.01.P01	37	14	32	10	398	45.3	8.95	120	92.7	101.2	96.8	94.4	94.4	142.6	73	85
PaLWMG0100791600.01.P02	46	15	31	7	346	39	8.57	120.5	117.6	105.9	101	101.1	100.5	99.1	71.9	82.4
PaLWMG0101442300.01.P01	56	11	27	7	216	23.9	7.24	106.3	102.9	90.4	107.4	107	109.6	110.9	83.5	81.9
PaLWMG0605535000.01.P01	41	12	27	11	343	37.4	5.16	107.8	121.7	106.3	93.1	98.5	94.6	79.6	85.9	112.5
PaLWMG0705933900.01.P01	22	18	26	18	1090	117.9	7.5	104.8	114.7	105.1	100.3	99.4	97.9	103.6	84.8	89.4
PaLWMG0504688600.01.P01	40	13	21	1	397	41.9	9.7	89.9	84.4	102.1	138.5	106.8	103.5	104.9	76.8	93
PaLWMG0806420100.01.P01	36	5	15	5	162	17.2	7.56	109.1	105.1	107.8	100	101.1	97.1	71.4	100.4	108
PaLWMG0605586500.01.P01	29	14	22	13	570	61.5	4.89	95.4	78.7	105.9	99.8	101	94.3	125	96	104
PaLWMG0101246100.01.P02	22	3	11	3	191	20.1	9.28	91.5	74.3	85.9	116.9	116.2	128.3	153.1	68.1	65.7
PaLWMG0504207600.01.P01	36	9	19	7	279	31.1	8.7	95.6	93.9	100.8	97.4	98.4	96	90.8	115.6	111.5
PaLWMG0303164500.01.P03	29	19	32	18	820	90.2	5.55	108	105	106.8	95.9	94.1	96.1	117.1	85.6	91.4
PaLWMG0403674500.01.P01	26	5	17	5	213	23.5	6.09	90	95.5	99.9	99.9	97.1	98.7	94.2	118	106.6
PaLWMG0100208300.01.P01	51	7	19	7	140	15.3	6.14	83.9	89	92.8	96	103.3	104.9	84.1	135.9	110.1
PaLWMG0504451100.01.P01	45	8	25	6	194	22	9.52	111	87.4	85.1	120	119.5	118.2	127.5	61.1	70.2
PaLWMG0100334800.01.P02	27	5	34	1	182	21.5	11.69	93	87.8	86.8	148.5	145.7	141.7	18.9	90	87.7
PaLWMG0806388800.01.P01	52	13	33	3	233	26.1	10.29	105.1	84.4	76.5	129.7	132.3	134.2	116.6	57.7	63.4
PaLWMG0810144500.01.P01	26	9	27	9	417	47.6	8.48	93.9	148.4	83.4	105.5	109.2	110	59.5	87	103.2
PaLWMG0806620100.01.P02	40	7	19	7	178	19.4	9.58	80.5	85	94.9	100.9	100	101.7	77.2	150.2	109.7
PaLWMG0605622300.01.P01	24	7	19	7	307	33.7	7.17	88.7	93.1	100.4	97.5	96.9	95.9	84	128.7	114.8
PaLWMG0806681500.01.P01	30	12	27	12	365	40.6	5.06	103.1	100.8	103.3	92.3	92.8	93.4	99.1	108.4	106.8
PaLWMG0504447300.01.P01	36	6	24	6	228	24.1	9.72	92.1	77.4	95.5	104.2	104.3	101.6	131.2	101.1	92.7
PaLWMG0303122900.01.P01	35	17	25	17	543	60.8	5.41	113.2	118.2	103	106.4	106	106	84.6	74.4	88.3
PaLWMG0604976500.01.P01	52	16	29	7	346	39	7.93	103.7	107.5	104.3	94.2	96.7	96.1	80.9	108.4	108.2
PaLWMG0705662400.01.P01	50	10	25	10	185	21.5	5.77	86.4	86.8	99	104.7	103.3	107.5	87.1	119.8	105.3
PaLWMG0806573900.01.P01	34	9	61	8	299	31.2	10.8	85.1	79.7	90.3	110.5	109.8	105.6	117.6	102.8	98.5
PaLWMG0100008600.01.P01	33	5	23	2	198	20.7	9.48	78.4	83.6	85.1	112.8	130.9	123.8	101.5	86.1	97.9
PaLWMG0101105700.01.P01	38	4	17	4	149	15.7	4.68	82.2	99.7	98.9	102.5	98.4	97.1	80.3	127.7	113.1
PaLWMG0605008700.01.P01	18	1	9	1	82	9.2	8.02
PaLWMG0706112300.01.P01	45	17	25	17	400	45.3	6.18	103.5	100.7	100.3	98.8	96.9	98.6	110.2	92	99
PaLWMG0504608400.01.P01	24	11	33	2	480	52.8	6.65	100	144.3	108.5	106.6	111.3	107.1	64.1	82.2	75.9
PaLWMG0605387100.01.P01	31	13	25	1	456	51.8	5.11	95.2	107.9	110.1	91.8	88.7	109.9	114.2	112.5	69.8
PaLWMG0504633400.01.P01	40	13	21	1	397	41.8	9.6	108.4	90.3	101.5	80.5	81	85.5	156.1	101.3	95.4
PaLWMG0403924900.01.P01	56	15	33	15	282	31.3	5.8	96.5	77.9	105.2	94.1	94	91.5	165.7	83.6	91.6
PaLWMG0101377300.01.P02	16	9	26	1	619	66.1	5.95	93	107.1	91.7	91.1	100.3	103.5	99.6	113.1	100.6
PaLWMG0202263400.01.P01	39	13	28	13	344	38.7	5.55	109.1	108.3	93.7	103.1	105.2	107.1	123	71.1	79.3
PaLWMG0101120000.01.P01	26	23	28	23	906	98.7	5.94	93.4	103.4	93.4	92.6	92.9	92.1	89.1	120.7	122.3
PaLWMG0709032700.01.P01	27	15	27	3	622	67.5	7.37	105.2	110	105.7	101.5	102.8	97.6	105.9	86.2	85.1
PaLWMG0302811100.01.P02	51	15	31	15	282	30.5	11.14	98.9	90.9	93.8	111.6	111.7	110.5	109.2	85.7	87.7
PaLWMG0100652800.01.P01	28	15	35	14	548	62	4.88	110.2	101.3	101.2	108.3	103	107.5	86.5	94.4	87.6
PaLWMG0302941300.01.P01	63	6	16	5	149	16.4	8.68	93.8	84.3	101.4	106.9	105.5	105.2	108.8	101.8	92.4
PaLWMG0806492700.01.P03	24	17	25	17	977	108.6	6.32	101	106.3	96.5	101.3	102.3	102.7	115.7	81.4	92.9
PaLWMG0202178800.01.P01	36	14	21	14	466	53	5.01	109.2	91.6	110.7	102.8	99.1	98.3	103.1	90.2	95
PaLWMG0100171000.01.P01	32	14	39	14	507	54.4	6.68	106.6	93.7	100.2	100.2	99	97.3	123.4	84.7	94.9
PaLWMG0403590000.01.P01	19	8	29	8	340	35.1	8.62	78.6	100.3	92.5	87.7	90.7	94	68.9	154.3	132.9
PaLWMG0605117600.01.P01	44	14	24	10	345	37.8	5.73	99.1	110.3	109	93.7	94.9	96.5	63.9	117.3	115.2
PaLWMG0202335300.01.P01	51	17	39	16	358	38.4	5.66	99.9	104.1	96.4	102.7	101.2	101.4	102.8	91.4	100.1
PaLWMG0705753600.01.P01	70	7	35	5	133	14.3	5.2	89.2	120.1	72.5	88.8	87.5	88.9	53.7	152.2	147.1
PaLWMG0202388000.01.P02	30	17	26	17	511	59.9	5.2	95.8	84.9	100.3	105.4	102.7	100.3	106.6	99.5	104.5
PaLWMG0604864300.01.P01	61	11	38	11	205	22.7	9.17	99.6	93.8	101	103.3	102.1	103	97.7	102.9	96.5
PaLWMG0101297500.01.P01	55	8	16	8	183	19.9	4.41	73.6	106.6	84.9	111	102.9	103.8	65	132.6	119.6
PaLWMG0403954200.01.P01	25	9	37	9	280	31.1	5.33	88.5	95.7	102.2	100.3	98	97.2	79.3	129.5	109.2
PaLWMG0403930300.01.P01	45	9	27	3	217	24.1	6.01	105.3	104.7	94.8	109.8	109.5	108.1	97.5	82	88.3
PaLWMG0504616500.01.P01	33	2	9	2	115	11.6	8.72	78.5	82.3	96.1	114.3	112.4	115.6	87.6	116.2	97.1
PaLWMG0403553200.01.P01	54	6	25	5	152	16	7.5	92.1	103.6	100.5	96.6	94.9	97.8	75.7	124.8	114
PaLWMG0100351400.01.P03	47	19	24	19	478	53.2	5.72	119.5	97.4	104.2	102.7	98.3	98.6	109.4	79.7	90.2
PaLWMG0202231700.01.P02	22	19	23	17	1060	114.3	6.39	101.7	91.2	112.1	99.7	98.6	96.8	107.4	92.6	99.9
PaLWMG0605284300.01.P02	39	16	22	14	570	63.4	6.23	84.2	175.2	85.8	101.2	102	103	56.2	94	98.3
PaLWMG0101361100.01.P01	39	12	30	3	366	40.6	6.39	94.9	90	96.3	103.8	103.2	105.3	95.4	106.6	104.6
PaLWMG0100171100.01.P01	33	11	32	4	391	42.7	6.55	97.9	89.1	98.6	94.9	93.5	94.3	111.9	102.4	117.5
PaLWMG0706242600.01.P01	47	7	24	7	158	17.3	7.12	82.5	90.4	98.5	99.3	96.8	101.7	84.6	132.6	113.5
PaLWMG0100856700.01.P01	34	7	28	6	274	30	8.72	103.5	116.3	97.3	122.1	123.5	123.4	77.8	68	68.1
PaLWMG0100754900.01.P02	31	9	19	8	338	36.8	4.88	99.7	87.8	95.7	98.2	99.3	99.2	137.4	88.5	94.2
PaLWMG0706155100.01.P01	27	10	23	10	473	50.6	6.4	112.6	96.7	104	106.4	107.9	104.1	110.3	72.6	85.4
PaLWMG0403486600.01.P01	27	8	20	1	346	38.3	9.7	114.9	113.6	91.2	105.9	116	111.9	103	66.3	77.1
PaLWMG0201524000.01.P01	41	14	28	14	346	38.9	6.65	101.8	90	98.4	96.1	94.2	97	118.1	105.3	99.1
PaLWMG0706251900.01.P01	27	23	33	23	972	112.2	6.57	101.7	116.5	102.2	99.9	99.4	99.2	79	97.4	104.7
PaLWMG0605190800.01.P01	28	4	16	4	227	25.5	5.29	114.6	99.1	101.5	98.8	99.8	97.4	144	71.8	73
PaLWMG0706013300.01.P01	25	14	35	13	513	58.4	8.09	87.1	126.7	74.5	87.6	89.7	89.9	48.6	156.2	139.6
PaLWMG0304300800.01.P01	38	17	25	17	495	55	9.2	103.5	102.9	99.1	99.8	99.5	99.9	107.9	87.6	99.7
PaLWMG0101260400.01.P01	66	7	34	3	131	14.1	5.2	95.8	107.8	99.6	89.2	93.6	90.7	67.1	136.3	119.9
PaLWMG0706049800.01.P02	24	25	30	13	953	111.3	5.86	109.5	117	100.8	102.5	98.9	99.9	111.1	76.6	83.8
PaLWMG0201847300.01.P02	32	16	50	11	552	61.2	6.95	121.8	112	106.7	101.5	99.9	98.1	108.6	73.5	78
PaLWMG0705684700.01.P02	25	17	29	11	624	69.5	6.43	106.9	126.8	107.9	97.6	98.7	99.5	94.2	78.8	89.5
PaLWMG0705648300.01.P01	21	9	28	8	473	52.5	6.09	89.5	90.3	100.7	97.7	97.5	97.3	94.8	120.3	111.8
PaLWMG0605227100.01.P01	21	4	18	4	238	26.4	8.31	94.6	98.8	106.1	93.4	94.3	94.4	76.1	124.6	117.7
PaLWMG0403962900.01.P01	25	14	25	4	588	65.1	6.67	83.7	70.7	85.9	97.1	99.7	100.6	65	147	150.4
PaLWMG0504742900.01.P01	53	11	27	6	149	17	4.25	63.8	78.4	73.5	109.3	111.6	108.6	132.5	121.4	100.9
PaLWMG0302969600.01.P01	18	28	35	24	1592	176.4	6.7	108.9	96.1	99.4	99.2	95.6	96.8	111.5	94.4	98.1
PaLWMG0100949900.01.P01	49	13	25	13	335	37.2	7.72	90	86.2	102.4	99.7	98.8	100.7	110.3	110.2	101.8
PaLWMG0504352800.01.P01	26	10	24	10	469	51.3	6.47	115.8	96.8	104.7	93.2	92.2	92.8	117.8	88.1	98.6
PaLWMG0709608500.01.P02	30	11	26	6	444	48.3	6.92	100.8	100	123.5	91.8	90.7	93.2	75.7	102.6	121.9
PaLWMG0806793800.01.P01	41	6	18	6	143	15.7	10.54	75.4	77.9	94.1	108.8	108.1	108	92.1	126.6	109
PaLWMG0303024900.01.P01	71	11	28	11	141	15.4	9.91	83.2	86.5	92.2	101.6	99.6	99.6	66.5	155.3	115.5
PaLWMG0302460100.01.P01	37	14	24	14	423	47.7	6.39	108.3	94.3	107.7	96.6	95	93.3	113.8	91.4	99.6
PaLWMG0101070900.01.P01	33	16	23	15	578	63.1	9.29	110.9	112.5	108.9	94.7	92.7	92.7	99.9	90	97.6
PaLWMG0304740700.01.P01	19	13	25	10	788	84.7	5.48	103.1	99.3	98.3	101.9	100.4	96.1	124.5	91.7	84.7
PaLWMG0303123200.01.P01	36	9	18	9	313	34.2	6.68	109.3	97.9	108.3	90.5	90.6	91.6	98	102.1	111.7
PaLWMG0101130200.01.P01	31	18	26	1	718	80	5.8	93.2	93.6	93.2	100.6	101.4	101.1	97.3	106.2	113.4
PaLWMG0605359900.01.P03	47	19	33	15	438	49.2	8.81	95.9	101.5	95.4	99.3	98.3	99.2	93	107.5	110.1
PaLWMG0605134600.01.P01	43	22	39	16	589	64.8	5.76	89	97.4	97.6	93.5	93.1	95.2	78.8	134.5	120.9
PaLWMG0806812600.01.P01	57	10	24	9	232	25.2	9.32	83.8	81.8	100.3	104.9	99.2	98.9	90.7	125.1	115.3
PaLWMG0302554200.01.P01	23	20	27	20	1028	116.6	5.43	105.2	108.3	107.2	98.8	98	95.9	95.6	94.6	96.3
PaLWMG0705765900.01.P01	29	8	21	8	304	32.7	6.39	102.7	134.8	108.5	103.3	103.3	109.3	60.1	79.3	98.8
PaLWMG0101005600.01.P01	53	12	39	11	272	29.6	6.8	110.6	105.6	97.9	106.9	106.4	107.9	97.3	79.6	87.9
PaLWMG0605302600.01.P03	25	7	18	5	414	47.1	8.81	94.3	95.5	96.8	92.9	88.8	92.1	81.9	134.1	123.7
PaLWMG0403609700.01.P01	65	7	21	7	159	17.4	9.07	97.1	89.3	89.3	110.6	108.1	118.2	95	102.4	89.9
PaLWMG0403569000.01.P01	33	14	27	14	487	52.8	6.81	91.9	102.9	101	99.3	98.8	99.5	86.6	110.6	109.4
PaLWMG0807218600.01.P01	33	10	25	3	384	42.1	6.46	87.3	85.1	87.5	89.2	94.2	97	127.7	109.9	122
PaLWMG0806847200.01.P01	34	10	17	10	393	43.1	8.19	109.4	100.3	104.9	97.3	96.3	97.1	118.5	85.4	90.9
PaLWMG0705940800.01.P01	36	10	20	10	363	40.1	7.56	94.1	87.1	101.3	101.6	99.9	95.6	104	103.4	113
PaLWMG0100226300.01.P01	27	16	22	16	820	87.7	8.21	101.6	101.7	99	105.4	108.1	107.1	88.8	94	94.3
PaLWMG0100638800.01.P02	35	15	24	15	517	56.8	9.06	99.6	98.3	94.5	98.5	101.4	101.4	107.6	99.9	98.8
PaLWMG0100203900.01.P01	46	10	24	7	237	25.6	5.36	104.1	98.6	102.2	101.2	104	104.4	105.7	89.9	89.9
PaLWMG0810234500.01.P03	35	13	32	9	466	49.5	9.28	119.6	118.7	105.8	97.9	97	96.7	113.1	66.7	84.6
PaLWMG0807214200.01.P01	30	5	23	5	180	19.8	8.6	81.3	81.4	105.2	100.7	99.1	99.2	99.6	130.7	102.7
PaLWMG0403989400.01.P02	30	20	27	20	814	89.1	5.52	88.1	99.1	102.3	99.6	97.3	98.2	81.4	118.8	115.1
PaLWMG0709005400.01.P01	26	6	16	6	284	31.2	5.92	99	83	104.6	103.5	103.9	100.4	115.1	100	90.4
PaLWMG0201610800.01.P02	39	6	26	1	183	20	9.61	68	50.7	70.5	114.2	109.8	112.6	274.1	52.7	47.4
PaLWMG0303183000.01.P02	30	13	26	13	532	58.3	7.25	109.5	96.4	108.8	93.9	94.1	95.2	120.5	82.4	99.2
PaLWMG0605405600.01.P02	9	5	13	5	770	85.8	6.55	76.1	120.3	85.5	129.5	131.9	142.5	49.1	93.2	71.9
PaLWMG0806878000.01.P01	57	10	22	7	206	23	5.08	93.7	103.7	89.6	106.3	104.7	105.6	125.1	81.9	89.4
PaLWMG0504454000.01.P02	20	14	20	13	787	85.8	5.48	90.1	100.7	95.4	101.6	102.9	104.9	90.8	109.3	104.3
PaLWMG0100329200.01.P01	44	6	21	2	160	17.5	5.24	61.6	61.1	63	118.7	115	120.2	49.8	152.8	157.7
PaLWMG0303144500.01.P01	30	15	29	11	553	60.4	6.8	118.7	114.5	107.5	99.5	97	95	98.9	79.1	89.7
PaLWMG0202248400.01.P01	44	13	31	13	286	31.6	5.02	110.5	92.3	109	99.1	98.7	97.6	111.9	84.4	96.5
PaLWMG0705862800.01.P01	60	8	19	8	196	21.7	6.92	85.5	80.8	93.2	95.9	95.9	92.2	143.5	106.1	107
PaLWMG0806899800.01.P01	25	20	26	19	841	93.5	6.25	100.7	80.1	105.5	93.1	94.5	90.9	147.8	88.9	98.5
PaLWMG0101203900.01.P01	42	15	29	7	420	46.9	8.98	87.6	86.1	109.3	142.8	135.2	137.5	40.7	87.5	73.3
PaLWMG0504738800.01.P02	36	12	25	12	425	46.6	6.35	109.1	106.1	110.5	97.1	98.4	98.6	78.4	99.1	102.7
PaLWMG0100939300.01.P02	25	19	28	18	1024	114.8	6.27	101.6	96.7	98.6	91.9	91.5	89.5	145.4	84.9	100
PaLWMG0100986800.01.P01	28	21	30	21	795	87.2	6.67	93.7	86.2	97.8	93.7	93.4	93.4	124	113.3	104.5
PaLWMG0202404800.01.P01	31	9	20	9	365	39.7	5.81	101.7	110.1	117.8	91.9	93	93.2	66.1	108.9	117.3
PaLWMG0302497100.01.P01	17	2	18	2	135	15.2	11.4	65.3	69.6	95.1	106.1	105.8	99.7	85.1	154.6	118.7
PaLWMG0100360600.01.P01	25	29	35	28	1120	129.6	5.81	105	92.2	91.3	93.1	95.1	94.6	154.6	86.5	87.7
PaLWMG0101241300.01.P06	19	5	16	5	364	39.7	8.78	92.5	80.6	95.6	93.3	91.3	93.8	152.2	98	102.7
PaLWMG0504483700.01.P01	40	18	34	3	464	51.2	6.48	97.6	95.2	95.3	93.5	96.6	143.6	99.6	91.5	87
PaLWMG0806775300.01.P02	19	7	17	7	481	54.5	5.88	91.3	120.1	107.7	92.2	92.1	91.1	68.4	118.4	118.6
PaLWMG0101047500.01.P01	27	7	18	7	286	30.9	9.55	98.2	110.1	98.3	101.6	101.5	102.1	70.6	108.2	109.4
PaLWMG0302656000.01.P02	23	11	23	11	588	66.4	5.8	107.1	112	105.1	98	99	98.6	81.8	95.6	102.7
PaLWMG0504268700.01.P02	28	10	27	5	411	44.8	6.8	106.8	118.5	101.3	104.1	107.5	106.4	62.6	84.6	108.4
PaLWMG0404020700.01.P01	24	11	21	10	496	55.9	9.42	104.2	110.7	93.7	106	107.4	113.7	90.9	82.2	91.2
PaLWMG0302715100.01.P02	14	12	22	12	883	92.5	6.77	82.3	89	94.8	101.9	100.4	103.4	93.4	123.9	110.9
PaLWMG0302983600.01.P01	29	16	25	16	672	75.3	8	108	137.4	100.6	108.2	108.1	107.5	89.2	68.1	73
PaLWMG0101436000.01.P01	43	22	40	22	567	62.7	6.61	107.3	80.3	102.1	101.2	99.8	99.4	134.7	85.5	89.7
PaLWMG0806623100.01.P03	20	16	27	16	914	101.7	8.81	108.8	89.7	108.1	91.6	90.2	88.3	129	90.5	103.8
PaLWMG0101013300.01.P02	31	20	28	20	767	85.2	7.06	97.8	92.1	99.4	99	98.8	100.2	102	102.9	107.8
PaLWMG0202223200.01.P01	31	12	31	12	488	52.6	9.16	82.3	106.3	86.1	104.4	107.2	109.9	63.1	129.2	111.5
PaLWMG0605341000.01.P02	48	9	18	9	218	24.5	5.29	90.8	93.1	100.4	98.1	96.9	95.2	88.9	126.5	110.1
PaLWMG0202253500.01.P01	32	7	20	7	256	28.6	5.45	109.6	112.7	105.7	95.7	99.5	99.1	93.2	86.1	98.5
PaLWMG0806650000.01.P01	41	12	31	11	333	34.8	9.03	98.7	104.8	108.5	93	94.8	96.3	79.2	113.9	111
PaLWMG0202167600.01.P01	23	11	22	11	584	63.3	7.62	94.8	90.8	99.7	94.4	99.5	98.3	111.3	104.1	107
PaLWMG0806929300.01.P03	33	14	27	14	584	62.5	8.22	105.8	102.6	107.9	99.3	98.7	97.6	87.2	98.8	102.2
PaLWMG0504140700.01.P01	30	21	27	21	778	87.9	6.13	112.5	105.4	107.8	96.5	95.9	94.5	103	86	98.4
PaLWMG0403739100.01.P01	39	6	17	6	207	22.3	10.51	85.6	73.8	95.3	105.3	106.1	110.7	117.1	111.3	94.7
PaLWMG0100743000.01.P01	40	14	38	10	423	46.7	5.9	120.8	88.6	104	96.2	96.9	97.1	123.2	75.3	97.9
PaLWMG0605509000.01.P01	31	12	24	10	507	56.7	6.61	100.5	100.1	105.5	94.4	95.4	95	98.7	102.1	108.5
PaLWMG0403750400.01.P01	38	15	31	15	413	45.4	5.57	96.5	103.8	100.5	97.4	96.2	97	84.1	112.8	111.7
PaLWMG0303252500.01.P01	14	5	17	5	504	54.1	5.2	86.9	102.1	95.7	103.4	91.1	90.6	92.6	125.2	112.3
PaLWMG0101343200.01.P01	19	18	31	9	1180	128.8	5.26	113	101	98.3	95.5	99.1	96	137.3	74.6	85.2
PaLWMG0201488900.01.P01	32	6	18	6	238	25.9	9.44	88.9	86.3	94.2	118.1	117.5	119	102.1	90.4	83.4
PaLWMG0504528000.01.P01	53	15	21	15	343	39.1	5.26	86.7	87.2	98	105.1	105.7	104.9	96.7	109.7	105.9
PaLWMG0101674100.01.P03	39	6	25	1	183	20	9.58	87.3	59.4	77.9	129.6	128.9	131.7	193.3	52	40.1
PaLWMG0302635400.01.P01	34	7	23	7	227	24	8.65	79.5	76.8	93	103	100.5	104.1	108.2	129.2	105.8
PaLWMG0101210600.01.P03	38	17	32	5	443	50.1	5.72	109.3	88.7	98.5	87.9	89.9	94.7	147.5	85.3	98.1
PaLWMG0202162600.01.P01	27	16	24	16	629	68.4	8.1	99.2	142.6	94.5	102.1	107.5	105.7	64.3	85.7	98.4
PaLWMG0605104600.01.P01	46	7	19	4	151	16.5	10.84	90.5	85.7	92.3	110.1	118.4	118.7	106.1	91.9	86.4
PaLWMG0302676800.01.P01	41	13	32	13	379	42.4	6.09	117.6	98.8	106.3	101.8	100.3	100.1	113.4	78.4	83.2
PaLWMG0202850700.01.P04	37	10	17	6	347	38.1	8.56	102	101.2	107	95.1	96.7	95.4	99	97.4	106.1
PaLWMG0201894200.01.P02	45	8	21	8	239	26.6	7.56	94.5	101.9	99.4	97.1	96.7	99	74.6	124.5	112.1
PaLWMG0504461500.01.P03	23	12	24	7	598	67.4	5.95	93.9	103.9	103.4	94.8	95.8	95.2	78.5	112.3	122.1
PaLWMG0605553900.01.P03	50	8	19	8	161	18.2	5.11	113.7	118.6	104.4	90.4	91	93.1	71.5	109.1	108.1
PaLWMG0605070600.01.P01	20	17	28	17	826	95.1	4.6	90.2	85.4	104.2	103.3	99.9	97.6	108.9	106.5	104
PaLWMG0202420400.01.P01	30	13	21	13	606	65.3	6.07	112.1	82.4	102.2	103.3	101.7	100.3	143.1	75.2	79.7
PaLWMG0202199300.01.P05	38	24	31	24	684	77.1	5.12	109.4	98.1	103.9	91.5	93	93.1	116.4	90.9	103.7
PaLWMG0100969300.01.P04	30	7	18	7	253	27.9	10.18	97.9	75.8	92.3	123.9	121.3	120.8	123.3	68.5	76.3
PaLWMG0504725200.01.P02	37	11	26	10	320	36	8.44	93.1	89.8	85.3	104.3	103.9	104.5	161.6	76.5	81
PaLWMG0302968300.01.P01	34	14	22	14	424	46.2	8	98.7	158.8	93	105.3	107.9	105.2	53.9	78.2	99.1
PaLWMG0605380700.01.P01	31	13	27	1	456	51.8	5.11	90.9	106.1	118.9	122.8	101.2	88.4	55.5	97.3	119
PaLWMG0605367700.01.P03	46	5	14	2	169	19.7	8.7	103.1	98.5	97	101.2	99.7	104.4	86.3	104.9	104.9
PaLWMG0605206200.01.P01	41	13	20	13	368	41.2	8.28	106.2	94	100.6	98.1	95.1	98.3	115.4	90.9	101.3
PaLWMG0100171700.01.P01	54	9	28	2	208	23.2	8.41	100.7	109.9	97.6	96.4	104.8	100	87.5	94	109.2
PaLWMG0303126100.01.P02	47	15	28	15	428	47.1	6.86	106.7	107.2	102	102.2	102.7	105.6	86.9	86.6	100.1
PaLWMG0806810600.01.P01	23	10	21	10	485	53.5	5.78	99.8	145.5	121.7	103	106.3	105.9	57.7	75.2	85
PaLWMG0705754100.01.P01	42	10	24	10	256	29	6.06	84	94.8	98.9	96.3	94.5	96.6	78.1	136.6	120.3
PaLWMG0202421400.01.P02	38	10	21	10	396	43.8	4.81	94.8	94.1	108.4	97.4	95.3	93.2	83.5	119.5	113.8
PaLWMG0403990200.01.P02	33	16	25	16	620	68.3	9.6	95.3	96.5	103	100.5	98	97.2	86.1	114.5	108.8
PaLWMG0100966500.01.P01	43	16	32	15	360	40.1	6.25	120.4	99.1	99.7	99.2	99.1	97.5	128.8	72.5	83.8
PaLWMG0403618800.01.P01	26	9	21	8	440	44.7	7.31	99.9	89.1	98.2	111.2	105.7	109.8	110.8	87.3	88
PaLWMG0101042600.01.P01	48	4	19	4	100	10.9	5.52	73.4	80.4	101.4	99.4	98.5	100	63.7	164.2	119
PaLWMG0403514400.01.P01	34	10	21	10	337	37.7	6.54	91	103.9	110.5	104	105.5	104.3	70.1	110.2	100.6
PaLWMG0605365800.01.P01	58	12	26	2	216	23.9	7.83	105.2	130.1	98.1	108.5	106.9	108.1	92.6	66.9	83.6
PaLWMG0604836200.01.P02	23	8	17	7	350	36.4	8.97	97.2	83	104.9	99.2	101	97.7	118.5	101.1	97.4
PaLWMG0806445500.01.P01	32	22	34	15	738	85.8	6.87	115	111.4	102.1	97.2	93.5	93.7	126.4	74.3	86.4
PaLWMG0806799200.01.P01	39	9	18	7	277	31.5	6	97.4	92.6	102.3	100.9	98.9	102.3	100.9	98.6	106
PaLWMG0605237000.01.P01	24	12	20	8	584	65.6	6.8	102	102	101.1	97.9	100.2	100	101.5	94.9	100.5
PaLWMG0706185700.01.P02	33	23	41	23	621	70.9	7.2	113.8	92.9	109.1	91.6	96.5	94.7	109.2	90.4	101.8
PaLWMG0604898300.01.P05	25	26	43	23	1153	128.6	5.53	109.9	109.2	108.4	98.5	101.1	98.9	101.7	80.3	92.1
PaLWMG0303173400.01.P02	50	12	19	12	356	37.4	7.74	88.3	87	108	108	101.4	101.2	92.4	109.5	104.2
PaLWMG0605340400.01.P01	43	10	18	10	306	34.5	8.5	100	94.8	105.4	96.2	93.8	94.9	87.5	114	113.3
PaLWMG0504757100.01.P01	38	8	25	8	320	33.3	8.59	98.6	117.1	98.3	103.2	103.2	102.8	98.7	87	91.1
PaLWMG0605489100.01.P02	32	27	41	27	740	84.3	7.17	109.6	104	102.1	95.3	97.4	97.6	128.6	78.5	87
PaLWMG0807094800.01.P02	33	20	29	20	722	83.4	8.69	112.4	93.4	96.5	99.4	98.5	97.3	130.9	82.7	88.9
PaLWMG0101095100.01.P01	15	13	24	11	1016	110.9	6.27	109.4	122.7	105.7	104.4	101.6	101.9	98	76.6	79.7
PaLWMG0100385900.01.P01	32	6	19	6	201	21.5	8.34	96	95.8	102.1	96	94.1	96.8	71.5	130.4	117.4
PaLWMG0100607600.01.P01	42	20	35	12	456	53.1	7.01	90.9	83.2	91.4	104.1	102.2	102.4	115.2	104.3	106.4
PaLWMG0504490400.01.P01	40	14	27	14	386	44.3	5.57	104.5	115.7	87.9	108.6	106	105.6	126.3	73.2	72.2
PaLWMG0100013800.01.P01	25	10	20	10	480	52.4	6.25	106.4	107.2	106.3	96.5	94.4	91	79	103.9	115.2
PaLWMG0100720900.01.P01	45	13	24	13	296	32.9	9.52	129.2	115.4	98.3	103.1	99.9	103.7	108.2	65.1	77.2
PaLWMG0807073100.01.P01	26	15	25	15	657	73.5	5.9	100.4	88	98.9	98.6	96.8	96.9	110.8	104.5	105.2
PaLWMG0604970100.01.P01	34	4	14	4	146	15.2	8.62	111.8	115.4	100.5	98.6	107.1	105.3	71.2	91.1	99
PaLWMG0809935500.01.P03	56	13	25	11	241	26.9	8.4	101.1	114.2	96.7	98.6	100.8	98.4	86.5	95.3	108.3
PaLWMG0201798800.01.P01	40	8	16	8	302	33.8	7.12	97.4	105.3	98.6	94.4	95	96.7	78.5	112.3	122
PaLWMG0303099400.01.P02	33	12	22	12	353	38.8	9.11	108	93.8	107.3	96.4	96.6	95.5	121.2	84.7	96.4
PaLWMG0806569200.01.P01	34	7	20	7	313	33.1	8.31	94	81.8	103.6	102.1	101.6	100	96.1	111.9	108.9
PaLWMG0605071200.01.P01	36	12	17	11	428	46.8	7.21	115.5	100.7	105.6	96.1	95.1	97	147.1	68.2	74.7
PaLWMG0101296100.01.P01	34	10	28	5	282	31.7	7.34	106.2	95.1	111.9	94.5	92.2	92.6	88	102.4	117.1
PaLWMG0101003600.01.P01	31	5	25	5	162	18.4	9.88	82.5	71.4	93.1	112.3	108.4	106.3	137.5	98.5	90.1
PaLWMG0302436900.01.P03	23	16	24	13	884	98.9	6.34	103.5	110	111.6	101.1	100.8	99.8	72.7	100.6	99.9
PaLWMG0605467100.01.P02	30	12	22	12	328	35.7	8.18	110.4	113.1	102.5	102.6	99.3	99.7	96.7	87.3	88.3
PaLWMG0303168900.01.P01	27	14	32	13	588	64.3	9.38	78.4	85.6	98.9	102.8	99.5	96.5	105.1	121.3	111.8
PaLWMG0806751800.01.P01	44	11	23	11	324	34.9	5.6	94.9	78.1	101.2	103.2	99.8	99.8	125.3	100.4	97.4
PaLWMG0302599400.01.P01	41	18	23	18	494	53.1	6.3	102.7	100.1	102.3	93.7	95.3	92.1	113	95	105.8
PaLWMG0101223200.01.P01	41	12	22	12	291	32.6	6.71	104.8	92.3	107.6	92.7	93.8	94.1	102.5	104.2	108.1
PaLWMG0302540700.01.P06	31	14	23	14	564	60.2	6.32	97.3	86.4	101.2	96.3	98	95.3	121.9	98.6	105.1
PaLWMG0100335600.01.P01	27	10	19	10	491	50.6	7.9	89.8	97.2	101.9	99.6	100.3	101.6	79.3	122.6	107.8
PaLWMG0202033400.01.P01	30	10	18	10	381	41.1	8.82	96.8	85.6	107.2	97.4	96.9	95.2	103.4	106.2	111.2
PaLWMG0806739000.01.P03	35	13	23	12	396	41.7	4.68	84.4	91.8	100.1	97.4	98.9	102.7	83.6	125	116.1
PaLWMG0100700800.01.P01	42	11	22	11	315	34.6	6.44	115.9	118.6	104.9	103.4	105	104.5	113.7	63.4	70.6
PaLWMG0705715200.01.P01	21	14	23	11	659	71.3	8.7	100	113	100.2	103.4	103.8	106	93.6	91.4	88.5
PaLWMG0302534000.01.P01	46	12	43	4	198	23.1	10.29	128.8	117.1	121.3	70.8	70.6	70.6	57.9	138.1	124.7
PaLWMG0806754800.01.P01	15	6	21	1	418	46.1	6.55	100.4	76.6	91.3	108.1	106.3	90.5	164.1	76.1	86.6
PaLWMG0605619900.01.P01	47	11	29	11	259	29.6	6.83	111.9	96.1	103.2	94.4	94	93.7	122.7	84.6	99.5
PaLWMG0100749500.01.P01	47	11	24	11	274	30.1	6.4	105.5	120	89.5	99.5	100	101.1	65.7	102.8	115.9
PaLWMG0604929100.01.P01	60	10	24	10	199	22	4.61	92.4	78.1	91.2	105.3	103.6	104.6	139.7	94.1	91
PaLWMG0504353200.01.P01	47	11	22	10	210	23.5	8.53	92.2	103.7	103.1	93.2	91.4	94.9	60.2	136.6	124.5
PaLWMG0504266100.01.P01	22	8	23	3	373	41.7	7.58	99.6	89.9	99.7	88.9	94.8	95.3	104.1	108.1	119.4
PaLWMG0605289000.01.P01	25	14	24	14	681	75.6	4.4	83.6	95.5	89	91.3	87.9	87.4	61.9	159.2	144.2
PaLWMG0303067600.01.P02	26	11	23	11	449	48.6	6.32	103.5	92.2	96	103.6	101.8	102	111.5	97.1	92.2
PaLWMG0403403900.01.P01	19	13	21	13	763	83.5	5.62	113.7	78.7	106.8	90.2	89.4	87.5	143	91.5	99
PaLWMG0605503600.01.P01	26	7	15	7	322	35.9	8.72	99.3	111.4	102.4	92.3	93.2	91.9	74.9	109.8	124.8
PaLWMG0101115500.01.P01	20	13	18	1	767	81.8	6.49	96	97.6	131.4	104.7	118.4	106.3	70.7	76.4	98.5
PaLWMG0504730400.01.P01	41	17	29	17	491	55.8	5.31	144.4	111	99.9	100.1	99.6	97.6	100.3	67.1	80
PaLWMG0101296800.01.P02	45	14	27	14	317	35.2	8.78	107.8	119.6	92.4	102.7	105.8	107.5	102.4	77.9	83.9
PaLWMG0806743200.01.P03	31	9	25	9	260	27.2	9.7	92.4	106	106.6	100.3	102.7	104.8	70.7	109.6	106.9
PaLWMG0302684900.01.P01	36	8	21	8	319	36.1	5.3	97.2	96.7	113	97.6	96.3	98.3	83.9	111.4	105.7
PaLWMG0202367400.01.P01	25	16	28	16	686	76.9	5.54	106.9	110.3	106	101.4	99.6	100.1	90.1	91.6	94
PaLWMG0806925200.01.P01	20	23	32	23	1280	142.8	6.29	109.9	85.6	105	97.1	95.7	93.6	126.4	87.8	98.8
PaLWMG0705751200.01.P01	40	9	21	7	348	37.7	6.05	108.6	109.8	106.6	99.4	101.7	102.9	93.6	83	94.5
PaLWMG0504534500.01.P05	25	19	23	19	910	100.5	5.87	109.1	98.4	104.6	99.9	99.1	97.5	117.1	83.1	91.2
PaLWMG0504514000.01.P01	19	9	26	2	519	59.1	8.31	115.6	49	91.3	78.4	76.6	71.2	343.5	35.7	38.8
PaLWMG0807128400.01.P01	30	9	22	2	384	42.1	6.34	84.1	70.2	87.9	90.4	94	83.5	202	95.2	92.7
PaLWMG0403613600.01.P01	38	8	24	2	216	24.1	5.9
PaLWMG0605311700.01.P01	11	3	14	3	377	39.6	6.06	94.7	94	102.3	99.2	101.8	98.9	84.7	108.4	115.9
PaLWMG0403494300.01.P01	39	19	34	19	528	58.2	7.61	99.7	93.7	104.8	95.9	94.6	95.8	109.6	99	106.9
PaLWMG0302558000.01.P01	34	7	23	6	263	29.6	6.68	109.6	145.8	102.3	107	107.4	108.5	71.1	68.5	79.7
PaLWMG0100529400.01.P01	30	6	17	3	255	27.4	7.77	95.1	115	101	97.5	97.4	101.1	69.4	115.7	107.8
PaLWMG0404093900.01.P01	46	14	21	11	346	38.6	6.47	94.1	121.9	82.9	100.1	101.4	103.5	68.5	109.4	118
PaLWMG0806632000.01.P01	34	18	32	18	585	65.6	8.88	96.2	87.6	103.8	99.1	99.4	98.6	112.4	98.1	104.7
PaLWMG0504450500.01.P05	21	15	28	15	858	91.6	6.73	95.3	86.4	93.2	109.7	107.7	105.2	118.7	95.1	88.8
PaLWMG0403935500.01.P01	13	19	28	19	1764	197.8	5.48	93.9	95.1	101.3	96.7	97.1	96.8	102.8	106.8	109.3
PaLWMG0101038300.01.P01	15	9	18	9	639	73.5	7.84	103.4	135	97.2	107.1	110.2	109.5	94.6	70.6	72.3
PaLWMG0706021500.01.P01	64	11	35	4	140	16.1	10.17	85.4	84.5	93.3	118.8	123.2	116.6	94.3	92.8	91.1
PaLWMG0404037100.01.P01	21	7	17	7	420	45.5	5.88	101.5	93	106	98	100.3	100.7	104.6	99.1	96.9
PaLWMG0302900600.01.P01	36	14	23	9	438	47.9	5.5	105.3	103.9	111.5	96.1	93.9	92.9	75.7	108.6	112.1
PaLWMG0806990700.01.P06	27	15	21	15	670	74.8	5.96	110.3	118.2	103.6	102.5	110.7	105.9	96	69.8	83
PaLWMG0403864500.01.P01	27	13	18	13	633	70.5	8.25	94.2	102.1	101.3	95.8	96.2	96.7	83.1	115	115.5
PaLWMG0806825500.01.P01	24	11	19	11	637	68.5	8.35	102.8	154.4	99.7	107.1	110.3	110	65.1	68	82.5
PaLWMG0303120500.01.P01	44	9	19	5	207	23.2	5.33	102.7	110.2	99.5	95.9	102.5	101.3	94.7	93.5	99.8
PaLWMG0101203100.01.P01	25	9	21	2	404	45.3	9.11	60.3	62.6	60.1	86.8	83.4	83.5	45.7	232.5	185.2
PaLWMG0605508200.01.P01	47	9	27	9	164	18.3	8.29	96.4	89.8	93.5	91.8	94.6	94.8	101.6	125.7	111.9
PaLWMG0101455600.01.P01	17	17	24	17	1096	121.4	6.21	123.5	124.4	105.5	103.6	99.3	98.9	99	65.6	80.2
PaLWMG0101114900.01.P01	20	13	19	1	767	82	6.44	83.6	88.8	99.4	95.3	95.5	89.6	82.1	124.9	140.7
PaLWMG0100060000.01.P02	34	6	27	6	234	26.5	5.71	93.7	91.4	101.5	96.9	96.3	97.4	84.5	127.9	110.4
PaLWMG0705820900.01.P01	28	12	21	12	571	63.1	7.3	99.1	124.4	102.8	103.4	102.8	102.6	69	96.9	99.1
PaLWMG0810323200.01.P01	42	10	30	1	221	25	10.42	107.9	75.5	94.6	97.1	99.2	104.2	169.7	83.1	68.8
PaLWMG0504373100.01.P02	63	10	36	8	168	18.5	7.08	91	97	99	97.8	100.2	100.4	76.2	127.2	111.2
PaLWMG0101113700.01.P01	17	10	17	1	768	82	7.36	89.8	89.5	100.1	102.3	95.2	97.6	75	116.5	133.9
PaLWMG0302598500.01.P01	90	6	15	6	67	6.9	6.57	74.9	116.4	82.3	84.5	89.1	85.8	62.7	161.5	142.8
PaLWMG0100258000.01.P01	6	4	19	1	562	61.1	5.82	91.1	94.9	109.4	87.3	97.2	97.9	85.2	119.5	117.4
PaLWMG0303027200.01.P01	42	11	18	11	338	37.7	6.99	105.4	111.7	99.8	93	94.3	94.1	85.7	106.1	110
PaLWMG0605084000.01.P01	22	14	22	14	712	80.3	6.05	109.5	94.4	110.5	91.6	91.4	89.3	111.4	93.2	108.7
PaLWMG0101096400.01.P02	40	7	15	5	251	27.1	9.16	100.4	104.4	102.1	104	103.3	102.8	104.5	82.6	95.9
PaLWMG0100937700.01.P01	30	15	28	15	500	56.2	6.01	114.9	97.9	100.9	94.5	95.8	96.3	114.2	90.4	95
PaLWMG0403583800.01.P01	29	6	24	6	191	20.2	8.94	84.3	88.9	103.1	102.7	102.9	100	83.8	126.4	107.9
PaLWMG0100653000.01.P01	23	21	29	21	937	106	5.27	99.9	78.5	98.6	96	95.5	91.3	161.1	84.9	94.2
PaLWMG0604803200.01.P02	36	9	19	8	302	32	9.23	90.8	80.2	94.3	101	100.2	98.1	146.4	94.6	94.4
PaLWMG0504461700.01.P01	26	15	24	15	602	68.3	8.62	116.4	103.5	103.6	95.4	93.4	93.8	109.8	87.6	96.5
PaLWMG0403819400.01.P01	23	14	25	11	526	59.2	9.44	94.5	99.6	102.3	110.8	112.7	110.7	105.3	82.6	81.5
PaLWMG0404000600.01.P01	46	10	20	4	270	29.6	5.12	68.6	79.1	80.8	142.3	133.2	136.3	47.8	117.8	94.1
PaLWMG0403712600.01.P01	30	12	18	12	464	49.8	8.06	117.6	101.1	102.8	104.3	106.1	104.1	112.6	69.6	81.8
PaLWMG0605591500.01.P01	60	9	27	7	175	18.9	8.15	88.7	92.5	101	99.5	100.9	102	96.7	116.1	102.7
PaLWMG0806591200.01.P01	32	11	15	11	379	42.7	6.28	91.8	93.1	103.2	94.4	92.1	92.2	81.6	126.6	125
PaLWMG0100219400.01.P02	18	19	30	16	1120	123.1	7.24	97.3	139.9	107.9	107.2	108.9	109.5	78.1	75.3	75.8
PaLWMG0403408300.01.P01	31	7	11	7	334	36.2	5.1	66.8	63.2	64.9	134.2	132.3	141.1	43.5	151.7	102.4
PaLWMG0303143000.01.P01	66	7	29	5	131	14	5.43	87.1	100.7	104	87.2	89.3	89.2	86.9	142.9	112.7
PaLWMG0201898200.01.P01	31	4	14	4	135	14.8	8.6	98.2	82.8	88.8	115	113.2	111.7	113.7	92.3	84.3
PaLWMG0705689700.01.P04	16	20	31	11	1132	124.2	6.95	111.1	106.3	97.4	103.6	104.6	101.8	119.7	75.7	79.9
PaLWMG0100072500.01.P01	51	7	12	7	455	34.1	10.52	88.1	114.4	93.9	131.9	134.4	132.7	71.1	71.8	61.8
PaLWMG0202386500.01.P01	48	16	30	16	296	33.8	6.25	92.8	90.4	93.5	100.9	101.4	103.4	88.1	120.2	109.1
PaLWMG0302608300.01.P01	56	8	22	7	184	20.3	5.58	98.9	131.5	101.5	126.3	125	127.3	65.4	60.5	63.6
PaLWMG0806687600.01.P03	16	11	17	9	690	73.8	9.35	102.7	89.1	108.3	102.7	102.7	101	106.7	97	89.8
PaLWMG0404773800.01.P01	25	15	26	4	631	72.9	6.48	81.1	90.2	104.2	96.1	92.7	94	87.2	134.6	120
PaLWMG0605516300.01.P02	17	12	25	1	759	79.5	5.4	112.5	141.6	108.6	102.1	107.6	113.9	71.2	67.2	75.3
PaLWMG0605457400.01.P02	39	6	17	6	240	26.2	6.52	95.5	107.3	101.1	95.1	92.7	90.6	74.9	111.7	131.2
PaLWMG0608411200.01.P01	50	6	12	6	131	14	9.74	77.1	129.1	74.7	82.5	82.6	81.4	39.9	189.2	143.5
PaLWMG0202251300.01.P01	39	8	23	8	293	32.2	5.22	105.8	97.8	109.2	104	103	101.4	81.3	101.7	95.8
PaLWMG0605205800.01.P01	34	7	19	7	278	28.3	9	90.6	82.8	98.9	105.8	107	96.4	131.5	93.2	93.8
PaLWMG0101176900.01.P01	26	7	14	7	345	38.2	9.31	95.6	95.1	98.6	98.3	97.1	99.7	83.5	120.5	111.6
PaLWMG0202008700.01.P01	39	11	25	11	353	38.3	6.8	94.3	108.8	92.6	98.9	99	99.1	71.2	121.6	114.4
PaLWMG0202134600.01.P02	30	16	28	11	618	67.4	6.86	106	118.7	93.2	90.3	94	95.1	103.6	88.2	110.9
PaLWMG0706290400.01.P02	18	8	30	8	485	53	5.1	93.1	93.7	100.2	101.1	98.2	99.6	95.6	114.3	104.3
PaLWMG0100695800.01.P02	21	16	24	16	845	95.9	7.27	111.3	111.8	108.3	100.2	99.3	98.6	81.1	91.5	97.9
PaLWMG0403814500.01.P01	31	7	17	7	293	32.2	5.25	106	111.3	98.7	101.6	101.7	103.8	97.7	81.1	98.1
PaLWMG0504256800.01.P01	32	18	25	18	594	66.4	9.31	96.2	82.4	79.9	111.1	110.5	107.4	147	85.2	80.1
PaLWMG0303112000.01.P01	32	13	22	13	410	44.2	5.06	82.8	82.8	95	97.5	97.8	100.7	109.2	122.7	111.5
PaLWMG0807108300.01.P01	16	18	23	9	1412	154.6	5.58	120.8	106	101.3	96.1	97.7	94.2	121.5	79.7	82.7
PaLWMG0202274400.01.P01	32	8	14	7	340	37.2	8.81	100.3	117.8	128.2	96.6	94.9	95.4	57.8	107.6	101.4
PaLWMG0504615400.01.P01	24	10	23	10	465	50.3	5.31	89.7	84.8	103.7	95.9	95	96.1	93	130.6	111.1
PaLWMG0100901900.01.P01	38	5	24	5	156	17.5	6.35	103.6	80.8	117.4	107.5	108.3	106.1	85.7	104.1	86.6
PaLWMG0100356100.01.P01	32	23	30	16	744	86.7	7.02	111.8	106.5	99.4	92.9	93.3	96.3	128.5	76.9	94.4
PaLWMG0101223900.01.P01	43	8	29	3	159	17.8	10.51	96	74.5	87.8	112.5	109.7	108.4	148.9	83.9	78.4
PaLWMG0806942900.01.P03	55	5	20	5	112	11.9	7.12	83.6	89.2	99	97	99.1	102.3	87.3	130.7	111.8
PaLWMG0806748000.01.P02	57	7	20	7	202	21.4	4.97	95.6	90.4	106.8	92	94.9	94.1	97.1	114.3	114.8
PaLWMG0806485100.01.P01	59	10	18	1	193	22.1	7.53	97.8	103.3	94.2	110.1	95.5	117.3	101.1	75.2	105.6
PaLWMG0303002400.01.P01	27	8	14	8	343	38.2	7.53	74.9	110.6	90.8	91.3	91.1	94.9	55.4	162.6	128.4
PaLWMG0302767600.01.P01	28	12	18	12	495	54.5	6.39	100.1	101.2	110.2	96.9	93.1	93.6	91.6	105.8	107.6
PaLWMG0705673900.01.P01	28	19	22	19	734	81	8.05	95.2	85.1	92.4	91.5	89.9	87.8	140.5	105.9	111.8
PaLWMG0604990700.01.P01	37	12	16	12	365	40.7	8.38	98.6	101.3	102	94.3	98	97.4	87.6	105.1	115.8
PaLWMG0806763300.01.P03	27	10	16	10	528	58.9	5.62	119.5	103.3	100.4	95.5	97.3	94.2	124	73.8	92.1
PaLWMG0506547900.01.P05	48	8	24	6	207	23.7	5.27	85.9	85.4	99.7	92.4	89	91.9	76.7	160.9	117.9
PaLWMG0100818900.01.P01	43	15	27	15	371	42.1	5.66	102.1	124.5	97.4	102.5	104.8	105.5	75.5	86.4	101.3
PaLWMG0100930200.01.P01	29	10	20	10	336	37.2	5.71	77.2	90.6	89.3	108.9	104.7	107.6	69.1	140	112.7
PaLWMG0101014500.01.P01	56	10	16	10	212	23.4	9.5	97.3	93.4	92.2	108.6	108.5	109.9	112.1	85.4	92.6
PaLWMG0100201200.01.P02	38	8	13	8	314	35.4	4.53	89.9	85.6	94.9	103.1	101	100.1	111.9	107.8	105.7
PaLWMG0404818700.01.P01	26	16	27	16	549	60.5	6.81	101.9	82.5	102.9	98.1	95.9	96.4	126.8	93.6	101.8
PaLWMG0604872300.01.P01	37	17	28	17	504	57.8	9.11	114.1	100.6	102.9	99.5	106.2	99.4	113.2	77.6	86.6
PaLWMG0705806700.01.P01	47	11	25	11	232	26.4	5.55	98.9	85.5	101.4	102.9	98.1	99.6	106.9	102	104.6
PaLWMG0202201800.01.P04	17	19	25	19	1212	134.6	5.47	111.7	99.8	97.2	100.2	99.4	95.8	146	72.3	77.7
PaLWMG0202396800.01.P01	54	14	31	14	252	27.5	6.8	100.4	103	95	96.6	98.5	99.5	104.7	96.4	105.8
PaLWMG0202092300.01.P01	27	22	27	22	840	91.6	5.45	105.7	106.2	109.5	98	97.1	95.1	100	87.6	100.9
PaLWMG0202114800.01.P01	33	20	33	12	609	68.1	7.52	93	106.3	90.6	99.1	98.2	108.5	79.5	104.7	120.1
PaLWMG0403941700.01.P01	57	11	29	11	179	19.3	10.56	99.7	79.8	92.6	114.5	115.5	115.9	142.8	68.4	70.6
PaLWMG0605594100.01.P03	25	7	15	7	371	39.9	6.8	111.8	118.6	105.1	104.7	103.1	102	86.3	77.4	91.1
PaLWMG0403589600.01.P02	26	13	17	13	576	63.5	7.59	107.7	98.9	106.9	99.7	101.9	102.6	110	78.6	93.7
PaLWMG0101160000.01.P01	53	11	22	8	236	25.4	5.21	96.7	87.2	101.4	97	102.9	105.2	114.1	97.4	98.2
PaLWMG0100023700.01.P01	24	16	21	14	681	77.4	7.68	198.3	75.4	113	95.9	91.1	92.2	103.1	67.6	63.4
PaLWMG0705947200.01.P01	16	17	24	13	1371	149.5	7.59	100.6	124.2	101.9	107.3	107.5	106.4	77.5	86.3	88.2
PaLWMG0100940700.01.P01	26	8	19	8	357	39.9	6.44	103.6	88	95.1	110.4	107.5	110.4	128.2	76	80.7
PaLWMG0605245800.01.P01	51	13	24	5	248	28.2	10.7	89.7	83.8	84.7	100.8	121.6	117.3	99.4	105.2	97.6
PaLWMG0705814100.01.P02	36	11	21	3	307	34.2	5.69	99.8	111.9	109.1	96.6	92.1	98.8	87.5	95.4	108.7
PaLWMG0403957300.01.P01	35	10	23	10	356	40.8	8.27	79.4	93.3	96.6	105.1	108.3	99	87.6	117.9	112.8
PaLWMG0303088500.01.P02	33	14	29	2	434	48.9	5.94	110	86.9	102.5	97.5	94.3	94.1	147.2	78.9	88.6
PaLWMG0100810900.01.P01	53	9	14	9	309	34.8	5.69	80.1	101.3	94.5	104.8	117.9	120.5	75.9	110.2	94.9
PaLWMG0506940000.01.P01	33	13	21	6	450	51.1	8.43	113.9	141.9	102.2	109.4	109.2	106.9	100	59	57.6
PaLWMG0202248200.01.P01	27	8	16	5	310	34.8	6.47	103.8	91.2	105	98.2	94.2	89.5	118.6	99.5	99.8
PaLWMG0403655100.01.P01	33	9	15	9	355	40.3	6.92	93.4	91	95.5	104.8	101.7	104.6	84.2	113.9	110.9
PaLWMG0404114000.01.P01	42	11	23	11	290	31.7	7.12	94.8	88.7	102.9	98.6	95.9	95.3	112.2	108.8	102.9
PaLWMG0202367900.01.P01	65	13	27	13	170	19.3	4.81	89	91.7	100.6	100.4	96.7	94.8	88.4	126.2	112.1
PaLWMG0201884000.01.P01	40	11	24	11	301	33.5	9.17	81.6	87.3	98.9	105.4	102.1	103.6	104	113	104.1
PaLWMG0806499700.01.P01	19	14	20	14	801	90.6	6.4	115.1	110.8	104.2	97.9	98.9	94.8	105.2	82.2	90.9
PaLWMG0806554900.01.P01	35	5	19	1	138	15.8	10.64	120.3	78.5	79.1	139.6	141.3	138.1	95.6	57.2	50.3
PaLWMG0708921900.01.P01	34	7	21	2	164	18.6	10.78	92.4	83.6	77.7	121.3	120.7	117.1	96.6	103.9	86.6
PaLWMG0605045200.01.P01	22	12	23	12	596	66.8	6.51	123.5	116.4	99.7	99.3	99.9	99.1	120.8	64.1	77.4
PaLWMG0100461000.01.P02	16	13	20	12	953	100.7	6.2	87.4	103.8	95.6	105.9	108.6	108.2	93.3	102	95.1
PaLWMG0706198300.01.P01	30	13	24	8	483	53.3	6.29	94.9	170	87.4	108.5	110.7	110.7	53.3	78.1	86.4
PaLWMG0406042300.01.P02	36	10	18	10	302	33.9	8.18	108.1	98.2	98.2	100.8	102	100.5	94.4	98	99.8
PaLWMG0302723400.01.P01	29	7	21	7	276	29.7	8.25	77.1	76	92.3	114.7	109.1	117.6	104.6	114.6	94
PaLWMG0605450300.01.P01	40	14	25	14	411	46.6	8.63	95	74.2	91.1	106.3	103.7	104.8	143.2	91.2	90.4
PaLWMG0302786800.01.P02	23	12	24	12	554	61.8	6.89	107.8	93.1	103.7	96	98.2	95.7	115.2	92.9	97.4
PaLWMG0101057600.01.P01	42	7	19	7	223	23.6	6.32	81.1	93	97.8	88.8	89	90	69.7	162.8	127.8
PaLWMG0706090100.01.P01	53	9	17	9	206	23.3	5.06	91.2	119.5	70.4	99	102.3	100	53.3	144.5	119.9
PaLWMG0101348800.01.P01	48	5	22	5	112	12.2	9.44	91.3	96.4	95.4	102.2	103	107.8	55.9	135.7	112.3
PaLWMG0806939400.01.P01	23	10	29	2	445	49.7	5.35	100.3	119.2	86	97.8	95.1	101.7	76	109	115
PaLWMG0100886500.01.P01	37	9	21	9	298	32.5	7.93	87.3	89.5	101.6	93.8	91.9	93.3	126.1	109.4	107.2
PaLWMG0604924300.01.P01	28	13	18	13	612	67.7	5.92	113.4	94.4	105.4	92.3	94.3	89.4	129.7	84.1	96.9
PaLWMG0303025700.01.P01	25	10	16	10	436	48.2	9.06	105.7	93.4	97.2	103.5	100.1	97.6	112.2	91.5	98.9
PaLWMG0100760300.01.P04	64	7	12	7	184	20.5	7.94	94.2	85.3	101.5	100.4	100.9	97.9	106.8	110.8	102.4
PaLWMG0202385200.01.P01	28	15	34	15	645	72.6	6.21	103.6	92.5	110	94.3	91.7	91	106.8	97	113.1
PaLWMG0101240300.01.P01	51	10	15	10	234	25.8	5.4	92.5	90.1	96.8	101.1	103	100	74.6	137.7	104.1
PaLWMG0605490100.01.P03	41	6	15	5	195	21.4	9.2	101.7	104.2	104	106.1	108.2	111.3	72.2	101.3	91.1
PaLWMG0101213600.01.P01	41	10	14	10	362	38.4	4.7	106.3	96.3	109.8	106.1	101.4	101.1	77.8	100.2	101
PaLWMG0605078400.01.P02	20	17	24	9	962	108.5	8.21	101.5	118.2	103	105.3	105.4	104	75.5	89.6	97.4
PaLWMG0605515500.01.P01	20	16	27	10	896	99	5.29	106.9	99.9	111.8	92.9	89.3	88.6	83.7	109.8	117.1
PaLWMG0403979300.01.P01	45	9	20	8	233	25.6	5.88	99.2	94.9	104.6	97.9	95.2	95	100	106.5	106.7
PaLWMG0100719300.01.P01	13	19	20	19	1824	204.5	4.78	109.3	103.7	108.8	94.9	96	97.5	107.3	84.4	98
PaLWMG0302459400.01.P01	41	8	15	8	258	28.3	9.61	79.4	91.8	101.5	105.7	96.1	98.4	75.3	133.2	118.7
PaLWMG0302563200.01.P01	36	15	24	15	467	52.7	8.47	86	95.9	95.2	97.4	99.7	98	92.5	120.9	114.4
PaLWMG0605612300.01.P01	22	17	26	17	863	98.3	7.09	121.2	104.7	97.6	98.8	99.5	98.7	134.8	71.1	73.6
PaLWMG0100987200.01.P01	20	10	16	10	599	65.9	8.12	88.4	90.5	101.9	103.8	100.7	100.4	92.4	110.7	111.2
PaLWMG0604772900.01.P01	40	15	25	15	339	37.5	7.05	89.7	86.3	102.5	97.3	94.1	94	116.3	110.1	109.6
PaLWMG0806806900.01.P01	34	8	15	8	318	35.6	5.03	100.4	83.1	101	107.2	103.5	103.6	119.7	92.1	89.3
PaLWMG0403892900.01.P01	31	16	25	13	479	53	7.4	111.6	87.6	101.3	100.7	98.3	99.5	125.5	86.6	88.8
PaLWMG0302854900.01.P01	31	10	27	9	314	35.2	5.49	99.3	99.9	102	100.7	101.5	99.5	90.4	106	100.7
PaLWMG0504727500.01.P02	21	8	15	8	507	53.8	10.61	88.1	73.1	86.9	111.2	111.6	106.3	152.6	85	85.3
PaLWMG0302715000.01.P01	35	11	25	10	355	37.3	8.73	90.1	82.2	99.4	103.1	101	101	102.8	109.2	111.2
PaLWMG0202023900.01.P01	42	19	25	19	599	67.2	8.37	103.4	105.6	101.5	104.6	101.5	102.7	93.5	87.9	99.2
PaLWMG0202035200.01.P03	26	15	23	15	737	82.7	8.38	98.1	90.5	110.1	93.4	93.7	91.3	110.4	99.8	112.8
PaLWMG0604942900.01.P02	55	8	17	7	190	21.4	7.31	102.9	111.5	106.7	100.8	102.1	102.7	72.2	101.1	100
PaLWMG0403927200.01.P02	49	20	31	20	367	40.6	9.61	102.3	87.9	100.8	96.1	93.8	92.4	143.1	89.7	93.8
PaLWMG0100351900.01.P01	73	5	16	5	90	9.9	4.32	92.3	94	94.4	107.1	101.6	100.2	80.8	122.5	107.1
PaLWMG0504758600.01.P01	54	9	24	9	166	18	6.6	81.3	88.2	97.5	105.3	103.2	95.3	65.4	151.1	112.6
PaLWMG0806975000.01.P01	38	12	17	12	375	41.1	6.14	104.7	112	113.2	93.4	93.5	94.1	106.5	91.7	91
PaLWMG0101038900.01.P01	25	5	25	5	227	24.8	8.25	75.4	82.6	97.3	93.7	94.2	94.6	89.6	152.2	120.4
PaLWMG0605406400.01.P01	84	9	18	8	115	13.1	4.88	81.2	93.7	93.4	97.1	93.1	93	72.2	146.9	129.4
PaLWMG0403987500.01.P01	56	9	27	8	204	21.7	6.18	86.2	87	101.9	101.1	96.3	96.2	86.6	129.8	114.9
PaLWMG0806977600.01.P02	27	11	17	11	451	49.9	7.02	102	83	103.8	97.5	95.2	94.9	149.2	84.6	89.7
PaLWMG0201885400.01.P01	37	13	20	12	383	42.6	7.65	107.5	118.1	99.2	99.3	99.7	98.2	101.7	82	94.4
PaLWMG0302753200.01.P01	36	12	22	12	388	43.5	7.3	95.2	79.3	93.6	102.1	103.1	100.2	157.2	82.8	86.4
PaLWMG0100365900.01.P03	10	17	20	17	2228	246.1	8.66	89.4	90	96.5	96.7	93.7	93.6	120.2	110.2	109.7
PaLWMG0806592400.01.P01	35	9	16	9	399	44.3	4.78	101.5	98.3	102.4	100.4	97.7	96	92.8	104.8	106.1
PaLWMG0705884400.01.P01	50	9	20	5	214	23.9	5.5	91.7	88.1	99.5	106.1	101.4	102.1	96.9	105.6	108.7
PaLWMG0705850300.01.P02	35	9	16	9	291	32.5	7.9	90.4	97.1	100.6	100.6	92.6	94.1	76.3	132	116.3
PaLWMG0806879200.01.P02	45	20	32	20	472	50.7	7.62	109.2	111.7	105.3	100.8	99.6	100.5	104.6	82.4	86
PaLWMG0504476900.01.P01	23	9	14	9	545	58.9	8.46	113.4	111.5	102.7	100.4	93.1	94.8	105.6	83	95.5
PaLWMG0100228100.01.P01	20	14	23	14	804	89.1	5.02	93.5	92.6	95.2	104	102.4	102.1	110.9	102.2	97.1
PaLWMG0806734600.01.P02	63	12	21	3	242	26.7	8.81	120.8	104.3	95.2	95.5	96.6	93.9	121.6	83.9	88.4
PaLWMG0101385200.01.P01	25	11	21	11	440	49.4	5.02	110.6	113.2	103.9	100.6	102.6	103.4	92.8	80.7	92.3
PaLWMG0504503700.01.P01	24	9	17	8	363	40.2	6.54	105.6	134.3	119.7	93.5	94.1	96	51.2	101.9	103.6
PaLWMG0605449200.01.P01	38	2	8	2	84	8.7	4.82	79.3	78.5	91.3	102.7	104.4	114.6	97.6	120.1	111.4
PaLWMG0705653800.01.P01	37	12	22	3	381	41.7	7.78	115.6	104.9	108.9	107.5	99.6	100.9	95.6	78.6	88.4
PaLWMG0504564500.01.P02	30	15	22	15	655	71.8	9.69	89.8	92.7	98.8	99.7	99	99.8	101.2	114.2	104.8
PaLWMG0403779300.01.P02	15	18	25	15	1355	150.1	5.5	99.3	104.1	106.3	97.4	93.9	94.3	82	108.6	114.3
PaLWMG0100583800.01.P01	37	14	26	11	403	44.7	8.56	98.2	105.2	103.9	100.1	102.6	98.1	99.5	95	97.4
PaLWMG0101240200.01.P02	30	13	19	13	493	53.5	9.1	106.8	104.9	99.6	104.5	101.6	103.1	113.4	81	85.1
PaLWMG0202053900.01.P01	40	11	22	11	321	34.9	7.46	103.8	102.7	106.8	101.6	100.5	99.3	79.1	103.1	103.1
PaLWMG0607359200.01.P02	24	10	16	10	549	58.8	8.18	81.5	114.9	67	75.4	75.5	77.2	52.8	179.8	175.8
PaLWMG0705980000.01.P05	31	10	26	10	323	36	6.23	81.6	86.5	101.3	97.6	97	96.3	80.2	140	119.5
PaLWMG0605466300.01.P02	45	9	18	9	238	26.3	8.95	91.1	84.3	94	114.7	111.5	109.9	118.3	90.3	85.8
PaLWMG0302766900.01.P01	45	10	21	9	214	24.6	6.65	100	81.3	94.4	106.6	108.5	111.3	133.4	79.3	85.2
PaLWMG0607309400.01.P01	10	8	21	5	890	99.7	6.49	107.7	104.3	106.5	99.8	100.2	96.3	69.8	107.8	107.6
PaLWMG0605399600.01.P01	19	14	26	9	722	77.8	6.58	104.7	121.1	96.1	94.9	98.4	93.9	95	82.8	113.2
PaLWMG0604811000.01.P01	31	17	27	17	576	64.3	7.27	104	97.8	107.4	95.7	96.6	93.9	102.8	95.5	106.2
PaLWMG0202393200.01.P01	39	8	20	8	239	25.7	8.1	90.8	85.3	101.6	112.2	109.7	111.7	108.9	95.5	84.3
PaLWMG0403845700.01.P02	18	11	16	10	778	85.6	4.59	99.5	96.7	102.6	95.8	98.5	96	116.3	96.1	98.5
PaLWMG0806542800.01.P01	64	11	25	10	240	25.8	6.21	95	91.5	110.4	98	96.2	96.8	80.5	120.6	110.9
PaLWMG0806886500.01.P01	42	5	21	4	138	14.6	9.47	89.2	92.5	95.7	108.3	112.4	115.3	78.2	106.4	101.9
PaLWMG0303474100.01.P01	42	8	25	5	183	20.7	10.26	91.4	86.2	104.8	102	104.4	104.3	83.1	120.5	103.2
PaLWMG0806400200.01.P01	42	12	18	12	326	36.7	6.84	104.2	104.9	91.6	111.7	117.5	117.1	94	75.1	83.9
PaLWMG0101384000.01.P01	29	14	26	11	557	63.4	6.29	108.2	99	101	102.1	100.8	99.8	117.3	80.8	91.1
PaLWMG0403595200.01.P01	38	9	14	9	282	31.1	6.11	97	111.8	101.3	102.3	101.9	102	89.8	95.1	98.7
PaLWMG0100783500.01.P01	31	8	19	8	274	30.1	9.6	96.1	87.9	88.2	118.7	116.7	114.1	134.4	71.2	72.7
PaLWMG0403868600.01.P02	23	6	11	6	457	50.5	6.6	105.1	85.1	99.5	96.3	88.3	91	146	86.4	102.2
PaLWMG0202975400.01.P01	35	6	67	2	457	51.2	6.49	103.4	103.8	96	100.4	108.7	108	105.6	86	88.1
PaLWMG0705644300.01.P01	35	5	19	1	138	15.8	10.64	95.5	84.3	95.8	126	121.3	117.1	76.6	102.3	81.1
PaLWMG0705852900.01.P01	25	9	14	9	544	58.4	9.89	90.4	89	95.8	110.1	107.6	109.3	93.2	102.6	102.1
PaLWMG0607623500.01.P01	27	6	10	3	272	28.7	6.93	96.9	81.3	99.1	79.3	75.5	76	200.8	97.9	93.3
PaLWMG0403631600.01.P01	30	9	19	9	442	47.1	8.56	107.4	107.6	94.2	105.9	108.2	111.3	111.9	79.4	74.1
PaLWMG0504187300.01.P06	32	11	18	11	464	51.5	7.02	96.2	85.2	100.9	103.4	101.6	102.5	108.9	101.4	100
PaLWMG0101174100.01.P01	28	8	17	8	328	34.5	8.41	106.8	94.4	102.3	96.3	96.3	94.9	115.7	89.8	103.6
PaLWMG0101135200.01.P02	35	16	24	10	500	55	6.98	109.7	123.7	100.5	99.5	100.3	99.6	87.6	84.6	94.4
PaLWMG0302534100.01.P01	17	12	16	12	733	85.5	8.02	107.6	96.2	106.3	99.1	98.4	95	108.8	89.2	99.5
PaLWMG0202172700.01.P03	50	13	24	13	351	37.8	6.2	104.5	105.7	106.9	96.8	99.1	98.7	82	98.7	107.6
PaLWMG0304043300.01.P01	76	10	26	5	97	10.6	7.4	85.4	91.5	98.3	101.4	98.3	102.5	69	135.3	118.4
PaLWMG0303016800.01.P01	59	8	20	4	153	17.3	6.57	88.2	91.1	92.4	110.5	111.3	112.2	101.1	98.1	95.1
PaLWMG0605290900.01.P01	40	10	19	10	329	36	8.13	116	85.2	95.9	97.4	100	97.7	159.9	68.3	79.6
PaLWMG0101062600.01.P01	35	15	26	15	382	41.1	8.41	104.8	101.2	94.2	104.1	107.6	107.9	123.1	76.5	80.6
PaLWMG0604792200.01.P01	31	5	14	5	185	19.8	6.95	90.7	101.3	100.7	88.2	86.9	89.8	64.5	147.4	130.6
PaLWMG0705988500.01.P05	47	13	30	12	301	32.5	8.97	111.7	147.5	104.1	106.1	108.8	109.6	83.8	64.4	64.1
PaLWMG0806498400.01.P01	26	7	13	6	354	39.6	9.41	92.3	86.9	93.9	102.3	104.6	105	122.9	97.1	95
PaLWMG0403893300.01.P03	28	13	17	13	603	66.5	8.72	99.9	93.9	100.5	99.8	97.4	97.6	111.1	96.5	103.3
PaLWMG0806865000.01.P01	30	18	26	18	758	83.9	5.86	117.9	121.1	108.1	101.4	101.3	100	91.3	76.2	82.6
PaLWMG0705917700.01.P04	35	7	15	7	268	29.9	6.86	110.9	100.7	106.4	95.5	96.7	95.8	76.1	108.9	109
PaLWMG0203205900.01.P01	39	8	34	2	193	22.1	9.94	102.7	89.3	94.8	108.5	107	105.3	101.7	91.7	98.9
PaLWMG0706143600.01.P01	31	19	32	19	595	67.3	8.38	109.2	102.1	101	99.7	98.4	99.2	109.7	82.4	98.4
PaLWMG0202094700.01.P01	21	6	17	6	257	29	7.77	109	105.3	105.7	109.1	109.6	108.9	86.6	83.8	81.9
PaLWMG0403848600.01.P01	13	12	19	12	994	110.4	5.21	116.6	115.4	101.9	101.6	102.5	102.8	120.1	67.9	71.2
PaLWMG0604945700.01.P01	44	9	23	5	216	23.9	6.55	98.1	110.1	91.8	111.9	108.5	116.2	94.6	77.8	90.9
PaLWMG0504298800.01.P01	12	11	13	11	1419	153.2	5.12	114.2	122.6	108.6	101.7	100.2	99.3	90.3	76.2	87
PaLWMG0403706700.01.P02	17	7	17	7	397	44.3	12.37	75.2	73.4	84.1	104.7	111.4	94.5	135.2	123.8	97.7
PaLWMG0303127100.01.P03	26	7	17	7	351	40	7.14	88	186.9	122	90.2	89.8	92.4	41.2	87.7	101.7
PaLWMG0504727200.01.P02	38	16	23	12	517	58.7	6.96	94.7	113.5	94	96.5	95.3	98.8	79.1	109.8	118.3
PaLWMG0605430300.01.P01	34	10	20	10	347	38.1	9.31	83.5	89.9	99.6	96.6	95.5	98.5	84.1	130.1	122.2
PaLWMG0605425300.01.P01	28	11	19	11	515	58	4.75	107.9	101.2	77.4	97.2	99.2	100	65.3	101.1	150.7
PaLWMG0303843600.01.P02	42	13	23	12	290	31.6	8.07	70.7	166.9	75.9	84.2	90.5	93.2	40.1	148.4	129.9
PaLWMG0100774700.01.P01	47	12	28	11	232	25.6	7.84	92.7	95.3	89.6	104.8	105.3	105.1	83.3	114.6	109.4
PaLWMG0100937900.01.P01	15	19	23	19	1415	155.6	6.48	99.8	94.9	105.4	92.5	92.6	92.4	107	105.4	110
PaLWMG0605382000.01.P01	33	23	31	18	816	89.9	8.41	109.5	114.2	102.3	97.3	97.5	97.6	97.9	88.2	95.5
PaLWMG0302430800.01.P01	22	9	22	2	437	49.1	5.6	112.1	86.7	96.3	100.2	102.8	97.1	146.9	77.5	80.5
PaLWMG0405690600.01.P01	19	14	19	13	1080	115.4	5.62	91.7	95.3	103	97.1	96.9	94.6	98.7	109.1	113.6
PaLWMG0404041900.01.P01	37	5	13	4	132	14.4	9.45	82.4	117.2	111.7	95.2	117.5	92.8	54	132	97.1
PaLWMG0806616600.01.P01	37	12	31	12	379	40.4	7.14	112.9	116.4	104.1	95.5	98.3	96.7	111.9	80	84.2
PaLWMG0806592700.01.P01	31	17	33	17	396	44.2	7.25	75.4	85.3	95.1	106.7	106.2	105.9	84.2	129.3	111.9
PaLWMG0605593900.01.P01	39	16	29	16	466	52.1	5.25	94.1	96.2	100.9	95.1	97.2	94.8	105.8	106.9	109.1
PaLWMG0605419200.01.P02	26	8	17	5	310	35.3	6.4	104	88.1	104.9	100	95.6	97.6	113.7	95.1	101.1
PaLWMG0101046700.01.P01	48	11	15	10	292	31.5	5.21	93.3	103.4	99.2	100.7	99.1	102.5	86	110.5	105.3
PaLWMG0504173200.01.P01	66	6	23	6	89	10	5.22	71.3	95.6	87.9	101.9	98	101	65.6	160	118.8
PaLWMG0201881800.01.P03	27	15	23	15	614	68.1	6.84	111.5	106.9	99.7	101	101.7	102.1	97.7	84.3	95.1
PaLWMG0605289100.01.P01	30	12	19	12	457	50.5	7.09	112.7	112.4	108.3	97.3	98.7	98.8	92.3	82.6	97
PaLWMG0504350900.01.P01	17	9	15	9	710	77.8	4.55	96.5	100.8	103	96.9	97.3	97.7	84.3	111.3	112.1
PaLWMG0100008000.01.P01	25	4	18	1	198	20.8	9.6	94.7	99.1	98.5	99.8	100.7	99.1	90.5	108.5	109.1
PaLWMG0100795200.01.P01	33	4	22	2	120	13.7	11.5	95.1	86.7	97.3	107.4	106.7	103.6	90.3	109.8	103.1
PaLWMG0504405400.01.P01	35	10	17	7	356	38.5	9.54	107.2	106.3	98.8	101.1	100.1	99.3	109.2	85	93
PaLWMG0302743800.01.P01	34	10	19	10	368	41.1	6.74	109.6	95.8	106.6	93.7	92.3	93.7	116.2	91	101.1
PaLWMG0303184900.01.P02	19	12	17	12	853	91.3	8.73	77.9	85.1	99.2	104.5	101.5	103.3	96.7	119.3	112.6
PaLWMG0100975300.01.P01	36	15	21	15	538	61.1	7.58	108.3	107.8	99.5	101.6	102.5	100.9	117.3	80.7	81.4
PaLWMG0504375600.01.P01	17	7	18	7	422	48.2	6.46	106.2	99	99.2	99.3	98.5	98.6	100.9	94.3	104.1
PaLWMG0504514700.01.P01	21	10	24	6	402	46.1	8.59	104.5	66.1	97.8	92.6	88.5	87.9	219	76.8	66.7
PaLWMG0706263100.01.P01	28	14	19	12	479	52.7	5.58	115.5	100.6	113.8	87.7	91.4	90	127.3	78.8	94.9
PaLWMG0806734400.01.P01	28	3	12	2	157	18	4.64	84.4	71.1	102.2	97.6	96.7	98.2	91.1	143.5	115.3
PaLWMG0303689800.01.P01	81	6	24	3	67	7	7.24	66.8	136.9	69	72.9	71.3	71.4	55	191.8	164.9
PaLWMG0605420200.01.P01	27	14	25	14	506	56.4	9.23	100.6	150.5	104.5	110.3	110.6	110.1	67.6	69	76.8
PaLWMG0403766700.01.P01	22	4	13	4	244	26.3	9.36	80.7	86.3	96.7	100.9	101.8	101.5	89.6	130.4	112.1
PaLWMG0100344200.01.P01	34	13	25	13	464	50.8	8.69	118.1	112.3	97.6	103.8	101.4	101.2	123.3	64.8	77.6
PaLWMG0201894500.01.P01	30	10	20	10	399	45.1	9.25	108.7	112.4	105.3	102.9	101.6	102.4	94.1	83.1	89.4
PaLWMG0504271500.01.P01	31	8	21	8	305	33.7	9.47	97.6	100	89.3	108.9	108.9	109.1	111.7	87.7	86.8
PaLWMG0706091500.01.P02	36	11	16	11	405	45	5.67	99.8	92.6	107.7	99	95	93.9	87.6	108.7	115.7
PaLWMG0100175000.01.P01	22	9	20	9	482	52.5	7.03	82.2	93.2	98.6	97.8	94.8	96.5	76.1	135.9	124.7
PaLWMG0101264700.01.P01	28	10	18	5	429	47.5	6.07	99.8	110.7	109	99.1	96.9	98.2	75.8	104.6	106
PaLWMG0201516400.01.P01	18	15	25	11	1082	120.9	7.27	101.1	104.8	100.7	101.7	100.5	101.9	96	95.1	98.2
PaLWMG0302785300.01.P01	22	8	11	8	553	59.1	7.14	113.1	91	112.1	92.7	90.8	93	139	78.7	89.5
PaLWMG0504205400.01.P01	30	7	18	5	279	29.8	5.8	105.4	96.8	96.8	111.1	109.7	105.7	119	76	79.4
PaLWMG0202011200.01.P03	19	13	20	12	674	76.8	9.36	108.1	109.9	100.4	99	101.8	103.8	94.7	86.4	95.8
PaLWMG0706293000.01.P01	23	9	17	9	477	51.6	7.06	105.6	117.7	104.4	100.7	100.9	102	84.4	87	97.2
PaLWMG0705757700.01.P01	30	9	22	9	332	36.1	6.29	97.4	96.3	104.4	93.7	94	94.7	88.3	114.4	116.9
PaLWMG0100594000.01.P01	35	4	19	1	105	12	10.32	90.4	75.8	88.4	107.4	103.8	109.5	166	82.9	75.7
PaLWMG0709447000.01.P03	24	3	15	2	186	19.2	7.65	88.1	95.4	100	93.2	97.2	94.5	78.8	137.2	115.6
PaLWMG0705873600.01.P01	19	13	21	8	853	94.5	7.55	99.6	99.9	96	104.8	104.7	104.6	100.3	97.1	93
PaLWMG0302772400.01.P01	26	18	23	18	829	90.6	7.12	108.3	105.9	105.5	94	93.9	90.6	96.4	98.2	107.2
PaLWMG0605305700.01.P01	49	8	30	1	146	16.7	11.02	109.2	98.8	96.9	111.9	107.7	103.3	94.9	91.5	86
PaLWMG0100315800.01.P01	53	9	14	9	232	25.7	9.26	101.4	97.6	98.3	99.1	101.4	103.9	94.3	102.7	101.4
PaLWMG0101154100.01.P01	36	9	21	9	270	28.8	9.64	86.7	94.2	94.8	87.2	89.3	88.5	64.8	166.8	127.7
PaLWMG0706330200.01.P01	33	6	20	6	172	18.4	9.22	71.4	80.6	93.7	107.6	106.1	108	92.8	136	103.8
PaLWMG0302479600.01.P01	33	15	20	15	529	59.4	8.37	106.4	92.5	103.6	89.1	88.5	88.3	122	101.4	108
PaLWMG0303041000.01.P02	44	9	20	9	294	31.4	6.57	81.2	79.8	99	106.5	108.5	109.1	83.4	132.4	100.2
PaLWMG0303135800.01.P01	40	11	19	10	354	38.6	6.83	103.9	107.1	105	101.2	98	98.9	93.1	95	97.6
PaLWMG0604890400.01.P01	27	11	18	10	476	52.6	5.62	101.6	106.6	108.6	96.3	93.4	92	83.6	106.3	111.8
PaLWMG0806683400.01.P01	22	12	20	11	573	64.2	6.32	106.7	118.8	102.3	96.5	99	98.5	95.5	84.5	98.3
PaLWMG0504187600.01.P02	39	7	16	7	222	25.1	4.92	83.7	91.1	95.9	102	102.2	100.6	70.4	141.9	112.3
PaLWMG0100803500.01.P01	38	4	10	4	143	14.9	9.35	75.5	78.2	96.1	107.6	101.3	103.2	139.5	106.2	92.3
PaLWMG0806609100.01.P02	18	6	16	6	492	54.3	4.65	99.3	98	101.8	98.8	105	103.5	98.5	96.6	98.4
PaLWMG0807176600.01.P01	30	14	21	14	637	68.9	5.83	105.9	99	100.6	99.9	99.8	102.4	112.6	84.5	95.3
PaLWMG0202401700.01.P01	33	10	21	8	285	31.9	10.18	86.3	83	95.1	97.3	96.4	94.3	113.1	122.2	112.3
PaLWMG0202073500.01.P01	38	19	27	19	501	55.7	9.25	98.4	117.1	94.9	105.8	104.9	105.4	114.9	76.7	81.9
PaLWMG0605622600.01.P01	46	17	24	9	428	50.2	6.28	94.8	92.3	91.5	112.6	116.3	117.9	92.6	87.9	94.1
PaLWMG0100467600.01.P01	50	9	16	9	237	26.4	8.63	105.4	100.4	96.3	106.4	102.2	106.5	106	90.2	86.6
PaLWMG0504735400.01.P02	21	6	13	5	345	38.3	5.68	95.4	97.1	99.2	96.6	94.6	95.7	115.4	103.6	102.4
PaLWMG0100413600.01.P01	23	8	14	6	432	47.4	9.33	112.6	103.4	100.6	98.4	100.8	102.2	77.7	97.8	106.6
PaLWMG0706258200.01.P01	21	14	19	14	863	95.9	7.56	90.8	88.5	101.3	100.9	97.6	96	110	106.2	108.7
PaLWMG0302786600.01.P01	26	10	17	10	468	50.8	8.92	79.4	87.5	94.9	98.2	98.3	98.7	85.8	139.6	117.6
PaLWMG0605210500.01.P01	29	8	17	6	347	40.6	5.64	94.3	94.5	104	92.1	94.3	91.6	95.2	118.4	115.6
PaLWMG0303202400.01.P02	37	10	24	10	241	28	9.22	95.9	97	102.6	98	97	97.1	88.7	120.1	103.5
PaLWMG0806846800.01.P01	26	11	19	10	543	57.8	5.08	82.6	84.3	95.2	111.5	107.4	105.9	103.8	114.6	94.7
PaLWMG0100391900.01.P01	23	13	20	12	724	79.9	7.47	106.1	115.9	104.9	99.6	97.4	99.4	89.7	88.5	98.4
PaLWMG0605004400.01.P02	35	13	16	5	492	55.2	5.48	111.7	72	116.1	93.4	90	89	129.6	88.2	110
PaLWMG0605049400.01.P01	26	10	21	9	506	56.1	5.5	95	94	106.3	100.6	98.2	98	81	117.8	109.1
PaLWMG0100323900.01.P02	28	11	20	10	431	47.4	8.5	98.7	108.9	102.1	112.8	117.3	116.2	65.3	87.2	91.5
PaLWMG0100119700.01.P01	53	10	21	10	204	22.4	6.29	107.3	113.1	91.3	108.5	114.3	113.2	112.3	65.4	74.5
PaLWMG0504749400.01.P01	33	12	19	12	432	47.4	7.8	113.1	120.3	105.8	99	99.2	101.5	96.2	75.7	89.3
PaLWMG0100007500.01.P01	47	8	17	8	185	21.9	5.27	101.3	107.9	101.2	111	109	111.2	70.6	91.5	96.3
PaLWMG0101040700.01.P01	41	7	18	6	244	26.7	9.25	82.5	94.8	96.8	101.2	100.3	103.5	64.6	142.6	113.6
PaLWMG0506393200.01.P01	41	8	18	8	204	24.3	11.43	102.7	87.1	78.5	105.4	113.7	111.1	153.4	72.6	75.5
PaLWMG0605290700.01.P01	24	20	24	20	883	104	5.48	116.9	89.7	100.2	94.7	95.9	91.9	139.7	76.1	94.8
PaLWMG0100337500.01.P04	27	20	26	20	818	90.7	8.48	102.9	138	99	103.2	107	106	71	76.2	96.6
PaLWMG0100322900.01.P01	56	9	18	3	193	22	6.7	99.1	86.2	96	103.4	106.5	103.6	111.1	95.2	98.8
PaLWMG0201486600.01.P01	27	15	24	15	594	65.8	5.63	87.2	94.8	102.3	96.3	94	95.2	74.6	134.3	121.4
PaLWMG0180000025.01.P01	32	4	5	4	313	22.7	9.92	84.2	136.4	118.1	104.2	109.9	110.4	76	83.1	77.7
PaLWMG0302519100.01.P01	37	8	17	7	300	32.4	6.01	104.4	101.6	108.4	99.7	99	95.9	120.6	78.6	91.8
PaLWMG0705855900.01.P01	21	12	19	10	605	68	5.44	109.9	104.2	108.4	96	97.2	96.4	106.9	85	95.9
PaLWMG0100756500.01.P01	22	15	22	15	698	77.4	6.79	112.3	111.4	107.7	96.6	95.3	95.9	113.6	78.8	88.3
PaLWMG0806807900.01.P01	17	8	15	7	516	56.2	9.58	83.7	110.4	105.3	88.3	90.8	88.7	54.7	144.9	133.1
PaLWMG0404032900.01.P01	47	8	14	8	203	21.8	9.35	111.2	136.1	102.9	105.2	107.1	104.6	64	73.7	95.3
PaLWMG0101087700.01.P04	31	15	21	15	532	64.2	6.96	98.9	82.1	92.1	100.7	100.6	93.5	155.1	86.6	90.4
PaLWMG0806552900.01.P04	27	6	15	6	287	31.9	9.57	83.4	84	94.5	102	102.5	99.7	78	139.1	117
PaLWMG0201913800.01.P03	16	7	16	4	415	46.7	6.8	123.3	91.2	100	91	90.7	91.6	109.6	103.9	98.7
PaLWMG0101817000.01.P01	56	11	24	7	201	22.4	5.16	100.3	98.9	88.4	112.2	111.6	110.4	118.5	80.3	79.5
PaLWMG0101130400.01.P01	32	18	23	1	681	75.7	5.2
PaLWMG0302672300.01.P01	19	9	16	6	542	60.1	8	100	115.2	91.2	121.3	115.7	120.3	86.7	70.4	79.3
PaLWMG0504313100.01.P01	27	11	18	5	469	52.8	7.53	101.1	122.7	107.2	92.2	100.2	104.1	78.6	92.8	101.1
PaLWMG0705910300.01.P01	35	8	14	8	258	28.5	6.54	86.8	91.8	102.5	101.7	101	98.8	86	120.4	111.1
PaLWMG0303157000.01.P02	40	9	27	6	173	19.7	10.42	91.6	81.6	89.4	109.9	112.1	107.5	113.4	107.8	86.7
PaLWMG0100307800.01.P01	26	12	21	12	502	54.8	6.43	115	112.8	112.1	94.2	91.7	90.6	96.8	87.8	99
PaLWMG0406032100.01.P01	39	9	19	9	325	34.4	5.34	82.9	82.2	98.5	105.2	100	101.2	94.6	118.6	116.9
PaLWMG0101388100.01.P01	35	9	14	3	351	39.2	8.07	98.5	90.1	90.9	106.7	103.8	103.5	113.1	95.8	97.7
PaLWMG0706118600.01.P01	23	13	19	13	621	69.1	7.85	107.1	95.8	103.6	96.5	95.4	92.9	120.7	90.5	97.5
PaLWMG0100681900.01.P01	54	7	19	6	108	11.6	6.54	87.8	85.4	97.6	92.7	94.4	97.3	127.1	113.4	104.3
PaLWMG0403825700.01.P01	32	15	23	14	537	59.8	9.69	97	141.4	102.4	98.7	100.6	102.1	56.9	85.1	115.9
PaLWMG0605613000.01.P01	26	11	29	9	429	47.7	5.8	101.9	109.7	99.5	104.9	100.8	101.4	86.7	91.1	103.9
PaLWMG0202182400.01.P01	56	16	26	16	326	36.9	6.43	97.3	92.9	100	100.8	97.5	97	113.9	98.6	102
PaLWMG0605497500.01.P01	23	13	19	13	654	73.9	6	103	118.8	100.3	103.4	107.9	109.5	102.5	73.4	81.2
PaLWMG0202252400.01.P01	47	13	23	10	282	30.9	5.25	109.1	81.9	102.4	119	112.7	116.7	129.3	65.3	63.5
PaLWMG0403397000.01.P01	37	10	14	10	355	39.5	7.46	123.3	114.3	99.5	97.6	95.6	94.1	132.8	67	75.8
PaLWMG0101361900.01.P01	32	6	21	6	246	27.9	9.95	122.5	103.8	95.6	103.5	100.6	99.6	133.9	64.7	75.8
PaLWMG0101443300.01.P01	17	8	16	4	554	62.5	8.15	106.8	108.2	100.8	97.6	94.4	97.8	113.1	87.7	93.5
PaLWMG0101301000.01.P01	24	4	10	4	288	32.8	8.62	93.3	77.8	94.1	103.9	101.6	105.7	148.4	87.8	87.4
PaLWMG0806384700.01.P01	39	12	21	8	363	39.2	7.05	97	97.2	103.4	96.4	92.1	91.1	92.9	109.6	120.3
PaLWMG0302777200.01.P02	40	6	9	6	224	23.8	4.28	91.6	102.5	105.1	98.5	97.1	97.6	73.4	118.8	115.4
PaLWMG0807128500.01.P01	52	9	17	5	201	22.6	6.09	105.5	108.9	89.7	114.9	112.6	114.1	122.3	62.1	70.1
PaLWMG0100936700.01.P01	63	14	19	14	268	28.6	5.11	91.2	96.3	98.5	102.5	102.1	102.4	99.7	106	101.2
PaLWMG0302776900.01.P01	45	16	26	16	320	36.3	4.96	109	97.7	108.8	95.6	94.8	92.3	97.3	98.7	105.8
PaLWMG0302516700.01.P02	25	3	14	3	163	18.3	6.52	94.9	102.3	123.2	98.7	101.8	106.2	66.5	115.9	90.6
PaLWMG0100802300.01.P05	23	20	25	20	923	104	6.64	93.4	92.8	104.3	96.9	93.8	92.7	105.3	110.4	110.4
PaLWMG0807082200.01.P01	40	7	8	7	283	29.7	5.29	79.6	108	66.4	77.5	78.8	77.1	46.9	213	152.6
PaLWMG0705813700.01.P02	38	11	22	3	307	34.2	5.87	103.2	103.7	104.9	96.9	102.4	94	98.3	94.3	102.3
PaLWMG0101452000.01.P01	51	12	21	12	304	33.9	5.2	78.8	89.3	95.5	105.5	101.5	103.3	78.4	134	113.8
PaLWMG0604796200.01.P02	17	13	19	13	879	99	5.33	102.5	82.8	100.7	99.7	95.8	94	138.8	92.1	93.7
PaLWMG0504421900.01.P01	19	6	11	6	494	52.2	7.03	101.9	101.8	101.8	97.7	93.7	92.2	111.3	91.6	108
PaLWMG0403865000.01.P01	55	9	20	2	130	14.8	9.42	82	83.1	97.6	106.4	96.2	96.1	74.7	149.2	114.7
PaLWMG0705743500.01.P06	24	17	21	17	753	84.2	5.22	98.2	97.8	100	94.4	95.9	94.4	96	110.7	112.6
PaLWMG0504485200.01.P01	28	13	17	12	488	53.9	6.6	118.4	119.2	110	97.1	99.4	98	83.7	80.4	93.8
PaLWMG0202090500.01.P01	16	14	19	14	963	105.5	5.97	87.7	93.1	98.7	97.1	98.6	96.9	104.9	107.8	115.1
PaLWMG0302707400.01.P01	42	16	32	10	402	46.1	7.25	98.7	99.6	101.2	98.7	99.3	98.6	97.2	103	103.8
PaLWMG0504444200.01.P01	36	15	24	10	490	54.7	8.24	126.4	126.6	95.1	105.7	111.1	111	58.7	67	98.4
PaLWMG0202355600.01.P01	42	7	26	2	111	12.5	11.43	87.8	86.7	88.5	115.1	113.4	110.9	75.4	127.9	94.3
PaLWMG0202239300.01.P01	17	9	12	3	649	68.6	8.35	88.3	86.1	95.2	103.5	101.3	102.9	133.2	90.7	98.7
PaLWMG0201500900.01.P01	22	12	16	12	650	70.1	5.25	107.4	108.2	108	102.6	98.3	100.3	104.1	81.9	89.2
PaLWMG0605592000.01.P01	25	10	14	10	417	46.1	5.41	114	89	94	94.5	94.2	94.2	162.8	77.4	80
PaLWMG0806694900.01.P01	35	3	11	1	130	13.7	5.9	72.6	93.9	91.3	108.8	136.9	95	69	125.1	107.3
PaLWMG0403659600.01.P01	52	14	26	11	258	29.3	8.29	118.5	107	100.7	97.9	98.1	99.2	114.1	71.8	92.8
PaLWMG0302669000.01.P01	24	8	24	5	352	38.5	8.7	110.1	116.3	105.5	101.5	100.6	100.8	114.9	72.5	77.9
PaLWMG0202150800.01.P01	29	7	17	7	395	43	8.12	90.3	108.5	104.2	93.6	92.2	94.6	63.6	130.7	122.2
PaLWMG0806446600.01.P03	21	7	11	7	453	50.9	7.56	94.9	90.9	107	96.5	95.8	96	113.4	99.3	106.2
PaLWMG0100909600.01.P01	28	5	19	4	159	17.9	4.96	82	90.7	99.6	100.7	97.8	101.2	72.6	133.2	122.1
PaLWMG0605464700.01.P01	45	5	18	3	119	12	8.73	111.5	96.4	111	95.8	85	98.2	63	138.2	100.9
PaLWMG0504185800.01.P01	27	11	16	11	509	55.1	6.33	107.4	102.4	107.5	102.1	100.6	101.8	88.8	90.9	98.6
PaLWMG0405737300.01.P01	15	3	10	2	281	31.6	9.1	89.6	110.4	89.6	90.1	95.7	98	68.1	126.6	131.9
PaLWMG0303247800.01.P01	25	10	18	10	416	46.1	6.24	111.7	99.5	100.8	98.9	103.7	98.4	108.1	84.8	93.9
PaLWMG0705753400.01.P02	24	3	16	1	131	14	4.84	91.2	83.9	108.9	95.2	96.6	96.1	75.9	139.2	113
PaLWMG0100393300.01.P01	16	8	17	4	511	56	9.06	86.9	219	87.9	117.5	118.6	115.3	38.3	62.1	54.6
PaLWMG0403636400.01.P01	32	13	21	12	408	45.6	7.56	102.4	113.9	109.4	122.7	121.9	121.1	61.9	75.1	71.6
PaLWMG0705831800.01.P01	46	8	30	4	147	16.3	7.24	71.6	87.3	96.8	101.3	95.9	101.6	90.6	138.4	116.5
PaLWMG0100639200.01.P01	62	8	13	8	157	17.6	5.11	89.3	86.6	96.2	105.6	101.7	99.5	78.2	130.5	112.4
PaLWMG0504572400.01.P01	20	11	21	4	611	69.5	6.29	99.3	116.5	94.4	104.8	111	109.9	89.2	78.4	96.5
PaLWMG0100899900.01.P01	46	7	19	7	150	16.9	6.96	110.9	91.3	127.1	136.6	138.1	138.9	75.8	42	39.1
PaLWMG0403348600.01.P01	20	12	20	9	564	65.3	5.49	106.2	69.9	87.9	72.6	73.3	71.9	263.4	76.6	78.3
PaLWMG0202026300.01.P03	39	12	14	1	365	39.5	8.18	122.3	80.4	115.8	84.4	89.1	89	99.3	105.8	113.8
PaLWMG0303170100.01.P01	46	12	23	11	284	30.3	5.6	118.8	101	108.9	95.5	95.9	95	110.4	77.2	97.2
PaLWMG0605314200.01.P01	27	12	14	12	573	63.4	5.2	91.2	93.1	102.6	100.4	97.2	96.7	98.3	110.2	110.2
PaLWMG0403703100.01.P01	23	10	21	5	475	52.2	5.87	93	79.7	89.9	103.1	96.6	96.3	176.7	81.7	83
PaLWMG0100322700.01.P01	43	8	17	2	193	22	7.53	101.3	97.5	97.6	99.2	107.6	108.6	102.6	91.1	94.5
PaLWMG0705653500.01.P01	29	14	19	14	546	60.2	6.77	96	108.7	100.4	97.1	96.3	97.8	74.3	114	115.5
PaLWMG0605485800.01.P01	27	7	11	7	362	40.4	6.67	108.9	120.1	96.2	100.7	105.6	103.1	100.7	76.6	88
PaLWMG0806727500.01.P06	11	6	14	6	607	68.6	6.83	83	90	92.1	105	101.6	100.2	101.1	107.4	119.7
PaLWMG0101319400.01.P01	40	17	24	17	522	57.9	6.06	107.1	88.9	100.3	92.5	91.3	91.9	149.6	82.1	96.3
PaLWMG0403325000.01.P01	29	6	12	4	266	29.4	8.9	84.4	87	96.8	103.3	100.3	99.9	91.9	123.4	113.1
PaLWMG0100237700.01.P01	34	10	16	7	351	38.4	6.95	108.5	112	101.2	107.9	103.6	106.8	98	77.6	84.2
PaLWMG0504409900.01.P01	46	11	18	11	305	32.8	9.44	105.5	108	98.3	92.6	94.3	96.5	76	117.8	110.9
PaLWMG0404103300.01.P01	25	13	20	13	571	62.9	6.73	105.3	111.5	103.9	103.1	102.7	103.5	88.9	83.3	97.8
PaLWMG0302723800.01.P01	20	14	21	14	821	91.7	6.86	101.2	96.5	103.4	93.4	95.4	91.7	112	96.5	110
PaLWMG0202302600.01.P04	31	10	15	6	360	39.5	5.99	108.3	113.2	101.8	98.3	96.5	97.7	104.8	84.5	94.8
PaLWMG0100013600.01.P01	26	6	12	4	341	38.2	9.19	103.1	98.4	102	102.8	99.4	97	107.8	92.8	96.7
PaLWMG0504536400.01.P01	28	14	19	14	488	53	6.57	90.2	97.4	102	100.4	99.3	94.9	89	119.8	106.9
PaLWMG0604872200.01.P01	21	10	18	8	574	62.1	6.73	116	89.3	105.5	94.9	93.2	89.7	135	81.6	94.8
PaLWMG0303111000.01.P02	25	8	11	8	437	46.7	10.65	83.1	91.1	95.5	102.8	101.5	105.5	96.5	120.2	103.9
PaLWMG0201590200.01.P01	32	16	24	16	482	52.4	8.24	117.6	85	92.6	98.6	99.4	99.4	168.8	67.3	71.4
PaLWMG0302854400.01.P01	24	24	27	24	1026	114.9	8.32	111.1	93.8	106	94.6	93.8	91.9	134.8	81.2	92.8
PaLWMG0806899200.01.P01	21	14	19	13	814	92.5	6.58	99.4	146.7	93.9	110.7	109	110.5	78.5	77.2	73.9
PaLWMG0201954400.01.P01	40	8	15	7	238	26.2	8.37	84.7	90	93.7	103.5	97.4	100.9	110.1	111.3	108.4
PaLWMG0504534000.01.P01	41	7	15	7	215	24.1	6.54	106.5	110	104.2	105.1	103.3	104	86.2	88.9	91.8
PaLWMG0604806800.01.P01	34	14	19	10	463	50.7	5.1	73.6	78.7	92.6	95.3	94.3	94.4	74.1	156.7	140.2
PaLWMG0302473800.01.P01	30	10	22	10	287	32	8.48	102	104.4	101.4	98.9	95.7	95.8	101.5	98.4	101.7
PaLWMG0806919900.01.P02	21	5	22	5	298	33.4	6.57	97.8	95.4	99	113	111.5	109.4	90	94.5	89.3
PaLWMG0403703700.01.P01	27	13	19	3	474	52.4	6.8	87.9	68.2	103.7	106.9	103.1	97.6	102.5	116.3	113.8
PaLWMG0100981600.01.P02	20	10	21	2	605	68.3	7.69	126.5	107.9	93.3	98.2	101.7	97.7	153.4	55.1	66.2
PaLWMG0504348600.01.P01	61	6	17	6	85	9.8	9.58	91.6	86.2	96.7	94.5	97.2	99	120.4	100.9	113.5
PaLWMG0303177700.01.P01	35	12	16	9	475	53.1	9.64	92.3	93.8	100.3	98.9	100.2	98.6	87.2	114.8	113.9
PaLWMG0101378300.01.P01	44	16	27	16	367	39.9	4.53	101.6	133.5	106.7	108.8	109.9	108.1	67.2	79.9	84.3
PaLWMG0100398600.01.P02	22	14	21	1	751	84.7	6.92	108.5	108.9	97.3	99.4	111.2	102.8	93.9	89.9	88
PaLWMG0706264300.01.P01	24	16	21	16	765	82.8	5.41	104.7	86.8	101.4	91.3	91.3	90.4	143.3	93.7	97.1
PaLWMG0504361400.01.P01	42	8	20	3	163	18.5	10.71	100.8	87.2	93.7	116.1	115.4	112.9	70	111.3	92.7
PaLWMG0403516600.01.P04	22	19	27	19	777	86.5	5.81	98.4	112.2	101.9	100.3	99.3	96.5	90	98.4	103
PaLWMG0403974500.01.P02	21	18	24	18	927	107.6	6.21	106.8	94	98	100.8	97.5	96.7	122	88.7	95.4
PaLWMG0302695200.01.P01	15	2	11	2	253	26.7	5.47	83.5	90.2	99.3	92.9	87.5	85	53.1	164.4	144.1
PaLWMG0806662800.01.P01	45	4	19	4	89	9.6	8.48	87.2	81.3	103.8	107.2	105	108.1	95.2	117.3	95.1
PaLWMG0504749000.01.P02	15	4	18	3	285	32.2	5.39	125.8	159.3	115.3	111.2	114	117.8	61.8	44.6	50.2
PaLWMG0607110200.01.P01	38	7	16	7	263	29.1	8.27	88.5	96.3	96.1	98.8	97	102.7	75.5	130.5	114.6
PaLWMG0404115900.01.P01	31	15	21	15	501	53.7	7.24	123.9	102.1	105.8	101.4	101.5	100.8	99	78	87.5
PaLWMG0100938200.01.P01	29	14	25	12	403	45.6	6.47	132.6	104.6	92.7	101.8	102.7	99.6	139.8	61.5	64.6
PaLWMG0302450600.01.P01	27	6	17	6	200	21.6	10.49	81.3	90.7	89.8	112.1	113.6	113.9	104.4	105.8	88.5
PaLWMG0302655400.01.P01	23	10	21	10	444	48.7	4.86	89.6	94.8	103.2	98.9	97.6	99.7	83.6	123.4	109.2
PaLWMG0202093700.01.P01	41	5	11	4	148	16.1	4.93	99.9	110.6	104.6	101.5	101.8	101.5	67.5	106.5	106.1
PaLWMG0100984401.01.P04	31	11	14	11	425	48.3	6.32	113.2	119	104.9	101.2	100.8	100.4	91.4	76.3	92.7
PaLWMG0100203200.01.P02	27	7	19	1	311	33.8	8.72	110.1	131.3	92	101.9	103.1	111.1	80.8	73.2	96.7
PaLWMG0604908400.01.P02	17	8	19	6	609	65.8	6.3	99.1	216.3	86.1	116.2	114.6	116.5	40.8	54.2	56
PaLWMG0504731400.01.P01	36	13	20	13	333	36.9	8.85	94.9	93.9	97	98.1	98.6	99.5	88.5	113.8	115.7
PaLWMG0304046600.01.P01	34	9	11	9	331	36.1	4.7	93.3	96.7	106.5	101.6	99.2	98.2	87.6	108	109
PaLWMG0100682600.01.P01	30	17	27	11	611	68.9	7.94	103.4	98.7	102.3	93.2	99.1	96.1	104.8	93	109.2
PaLWMG0806501300.01.P01	25	18	23	18	900	102.7	5.86	84.3	90.8	101.4	103.9	99.5	98.8	77	124.6	119.7
PaLWMG0806865100.01.P02	27	18	21	18	683	79.1	5.49	111.6	101.7	97.6	90.3	89.7	89.8	101.1	104.1	114.1
PaLWMG0705727100.01.P01	23	12	17	12	549	59.5	9.16	102.8	87.4	106.7	98.3	101.2	96.9	117.5	89.7	99.5
PaLWMG0706232600.01.P01	31	4	12	4	154	16.7	4.92	93.3	103.7	99.9	93.9	95.4	97.7	65	132.2	118.9
PaLWMG0100279300.01.P01	45	12	18	12	324	35.5	7.02	114.1	103.6	100	103	103.8	104.5	111.9	74.7	84.4
PaLWMG0504309100.01.P01	36	14	29	14	389	42.7	6.25	102.7	96.5	105.3	96.1	99.8	101.4	92.5	99.6	106.2
PaLWMG0806571000.01.P02	31	7	20	7	264	28.5	5.16	112.7	114.7	101.6	103.8	106.6	103.8	97.1	73.5	86.2
PaLWMG0403866100.01.P01	23	10	31	10	393	45.3	10.1	90.3	84.7	88	114.5	112.2	114	98.4	104.2	93.6
PaLWMG0302778400.01.P01	18	4	14	1	279	31.8	8.91	96.2	160.2	126.4	59.5	60.3	67.1	38.5	158.1	133.7
PaLWMG0403777900.01.P01	31	11	16	11	486	53.8	6.14	113.5	118.8	107.9	97.6	102.3	102.4	79.4	82.4	95.6
PaLWMG0100975900.01.P01	17	12	13	12	995	106.5	4.73	89.7	93.9	101.9	103.3	99.1	97	96.2	111	108
PaLWMG0504379100.01.P02	22	7	13	3	286	30.6	9.23	86.1	82.9	91.6	111.6	111.7	108.2	155.5	78.3	74.1
PaLWMG0605622200.01.P01	38	15	23	15	414	48.8	8.72	98.4	86.4	98.3	96	94	93.2	107.3	109	117.5
PaLWMG0303145600.01.P01	25	8	12	8	360	38.5	8.38	82.1	100.3	97.8	88.8	90.2	88.7	73.4	142.5	136.3
PaLWMG0806510300.01.P02	39	6	15	6	205	23.6	6.43	85.6	83	95.9	99.7	99.1	101.1	89.5	135.4	110.6
PaLWMG0303258400.01.P01	16	8	18	7	511	58.2	5.25	107.6	120	100.7	106.5	111.2	109.7	87.1	73.5	83.7
PaLWMG0404093500.01.P01	40	12	16	9	349	38.3	5.74	108.1	92.8	99.1	90.9	88.4	90.2	106.2	112.6	111.6
PaLWMG0605306100.01.P01	18	7	10	6	549	60.4	6.86	89.7	158.8	86.6	112.1	112	112.8	81.5	69.1	77.3
PaLWMG0101120400.01.P03	23	5	15	5	279	30.8	9.1	94.9	91.3	95.3	100.2	98.2	97.5	113.8	103.9	105.1
PaLWMG0705781500.01.P01	38	15	18	12	434	49.8	6.86	101.6	94	96.4	99.4	102.2	103.2	115.1	91.1	97
PaLWMG0100535000.01.P01	32	8	22	7	277	31.6	9.19	85.4	129.4	136.3	83	86.1	86.9	71.3	129.3	92.3
PaLWMG0403532800.01.P01	43	3	7	1	113	12.6	8.43	66.5	80.8	81.2	109.9	102.7	103.3	71.7	151.4	132.5
PaLWMG0101440000.01.P01	35	7	15	7	231	26.6	9.94	94.6	88	98.1	113.2	110.6	108.6	100.6	90.7	95.7
PaLWMG0100993000.01.P01	27	9	24	8	367	40.3	6.23	85.2	99.2	98.8	89.8	91.8	92.2	89.2	135.9	117.9
PaLWMG0504686100.01.P03	24	12	18	7	588	65.9	5.43	104.7	112.3	93.3	95.6	95.8	95.6	124.6	86	92.1
PaLWMG0708691400.01.P02	61	7	26	7	109	12.3	9.63	83.4	92	100.5	105.5	103	104.3	83.4	124	103.9
PaLWMG0100283600.01.P01	52	11	24	11	180	20.7	8.57	111.9	106.9	92.6	105.8	106.3	104.6	122.9	72.3	76.7
PaLWMG0605356200.01.P01	35	5	13	5	254	28.5	8.41	96.2	92.6	101	101.8	101.7	100.4	91.5	103.4	111.4
PaLWMG0604955900.01.P01	28	11	18	6	450	50	9.39	100.4	104.6	100.1	94.3	95.6	96.2	92.8	102.6	113.3
PaLWMG0100948600.01.P02	23	15	26	15	778	87.7	6.04	89.6	115.9	87.9	100.4	97.6	98.8	97.1	106.1	106.6
PaLWMG0806390600.01.P01	19	7	15	6	475	52.4	7.14	79.5	88.1	94.5	98.5	93.6	96.3	79	139.7	130.8
PaLWMG0504161500.01.P01	39	11	18	6	352	38.9	8.02	102.5	86.7	104.3	87.2	88.7	94.1	148	89.2	99.4
PaLWMG0806387200.01.P01	49	8	25	1	146	16.8	10.9	103.4	92.4	96.7	111.2	109.4	109.3	94.4	91.6	91.6
PaLWMG0303052800.01.P01	35	13	33	7	440	48.4	6.54	113.5	86.8	100.5	111	112.3	113.3	86.7	90	85.9
PaLWMG0605222100.01.P01	38	18	26	18	510	56.3	5.57	110.7	92.8	105	99.9	97.9	101.2	113	84.1	95.2
PaLWMG0706335400.01.P02	10	16	21	16	1824	200.4	6.49	114.5	114.9	106.2	101	97.4	97.6	114.8	70.4	83.1
PaLWMG0101258500.01.P02	52	3	10	3	98	10.3	9.19	80.6	89.6	95.3	97.8	102.4	104.6	85.8	132.1	111.8
PaLWMG0504577200.01.P01	43	10	18	10	256	29.2	9.41	111.7	71.5	89.1	91	89.5	84.1	213.7	72.7	76.8
PaLWMG0202264400.01.P01	36	8	19	6	281	31.4	5.96	109.1	107.4	101.2	105.8	105.3	104.2	89.1	87.6	90.4
PaLWMG0403584200.01.P01	38	9	15	8	300	33.2	6.99	98.4	108.6	105	98.6	96.4	96.2	85.8	102.7	108.3
PaLWMG0202281900.01.P05	46	17	24	17	405	44	7.75	109.4	93.1	104.3	104.6	103.1	104.3	118.8	81.3	81.2
PaLWMG0403962500.01.P01	20	11	19	6	595	65.5	6.32	100.4	93.9	109	97.2	94.4	93.5	115.2	98.7	97.7
PaLWMG0100971000.01.P01	36	3	12	2	115	13.2	4.96	88.9	78	105.3	110.1	101.4	106.3	82.1	126.8	101.2
PaLWMG0806396100.01.P01	26	17	20	17	718	81	5.82	114.3	78.2	94.8	91.4	92.3	89.5	181.6	73	84.9
PaLWMG0202306600.01.P01	31	8	12	3	395	42.5	8.22	98.3	95.9	97	103.2	108.5	104.5	108	87.7	96.8
PaLWMG0302699200.01.P03	24	8	12	7	494	52.1	8.76	104.5	110.6	104.4	102	105	102.8	83.5	93.6	93.6
PaLWMG0201894900.01.P01	37	8	13	8	253	28.2	4.92	109.3	102.2	113.7	99.7	96.6	95.1	76.3	106.8	100.3
PaLWMG0303247500.01.P01	21	10	19	2	605	68.2	7.69	98.3	101.3	96.1	105	99.9	95.4	85	101.8	117.2
PaLWMG0303046000.01.P02	45	11	15	11	268	29.1	6.04	93.4	81.9	103.3	100.7	96.3	96.5	103.7	118.2	105.9
PaLWMG0302663800.01.P01	19	5	13	4	327	35.4	8.22	82.9	102	104.8	88.1	89.3	88.2	61.7	133.1	150
PaLWMG0504134800.01.P02	33	6	12	6	243	26.9	5.74	86.3	81.5	98	95.1	96.4	100.5	123.6	110.6	108.1
PaLWMG0302562200.01.P01	23	16	18	16	808	91.3	5.85	105.4	126	92.3	98	100.5	97.8	84.6	84.5	110.9
PaLWMG0303277400.01.P02	30	11	20	11	420	47.6	7.2	115.3	128	103.7	107.5	109.5	110.6	90.7	62.9	71.8
PaLWMG0709213300.01.P01	54	4	16	1	69	8	9.88	82	61	71.6	109.3	110.6	109	233	63.1	60.5
PaLWMG0405487300.01.P02	43	10	15	10	322	35.3	5.24	94.4	92.1	101.8	101	98	96.7	120.8	93.4	101.9
PaLWMG0100625800.01.P01	23	6	8	5	404	45.1	5.58	104.8	118.9	96.5	98.3	99.7	100.5	149.4	63.3	68.6
PaLWMG0504615500.01.P01	68	6	11	6	131	14.8	9.01	75.1	75.1	88	108	108.7	106.2	152.9	97.2	88.8
PaLWMG0604790000.01.P02	27	6	10	2	345	39.3	5.9	110	102.3	98.1	104	97.1	100.5	119.2	79.2	89.6
PaLWMG0806683100.01.P01	36	12	18	12	523	58.8	6.02	99	98.9	98	98.6	99.4	99.5	91.8	106.4	108.4
PaLWMG0806704500.01.P01	22	8	12	8	502	56.8	6.33	106.3	99.1	109.3	99.6	96.1	97.3	106.7	89.8	95.8
PaLWMG0202061600.01.P01	65	15	25	14	198	21.8	7.33	80.4	93.6	90.4	103.5	103	103.4	78.3	134.8	112.5
PaLWMG0202298600.01.P01	24	7	20	7	260	29.2	8.29	87.9	94	104	100.5	102.2	105.2	72.6	122.7	110.9
PaLWMG0705817700.01.P01	14	16	21	16	1190	132.5	6.07	110.3	112.5	105	101.1	103.5	100.5	95.6	85.5	86.1
PaLWMG0403503800.01.P01	31	14	16	12	545	61.1	6.74	101.9	105.4	96.7	100.1	100.7	99.7	97.3	96.5	101.6
PaLWMG0706075800.01.P02	28	17	25	17	557	62.1	4.96	101.9	97.9	106.5	95.9	96.3	96.1	89.3	103.5	112.6
PaLWMG0806922900.01.P01	17	6	12	6	491	53.4	5.69	95.7	116.5	108.9	106.5	105.6	102.7	94.1	86.4	83.6
PaLWMG0303186000.01.P01	33	13	17	13	399	44.4	8.94	117.9	125.6	97.1	105.1	105.3	104.7	107.6	59.9	77
PaLWMG0806863700.01.P01	45	13	22	13	344	38.8	7.2	107.1	115.6	101.3	99	100.7	99	111	77.5	88.7
PaLWMG0705742200.01.P01	12	7	13	7	778	86.7	9.03	116.9	130.7	107.3	104.1	103.9	104.3	95.4	68.1	69.4
PaLWMG0604767800.01.P01	33	12	20	12	347	37.4	6.11	102.7	108.6	100.2	105.6	106.4	103.8	81.2	93.2	98.3
PaLWMG0807248000.01.P01	20	11	17	8	664	71.8	7.58	114.6	100.9	99.8	96.9	97.2	102.1	122.5	76.9	89.2
PaLWMG0100049300.01.P02	40	8	22	8	207	23.2	8.81	86	89.4	97.8	106.5	107	107.9	88.1	117.8	99.6
PaLWMG0100237900.01.P01	35	8	16	5	301	33.2	8.34	88.2	105.6	106.9	103.8	95.1	96.7	70.3	121.3	111.9
PaLWMG0202027300.01.P02	34	4	11	4	175	19	4.27	91.1	96.1	98.4	119.8	125	97.7	64.8	116.6	90.6
PaLWMG0706069900.01.P05	27	8	14	8	304	33.1	8.53	114.1	113.5	106.8	96.9	102	103.2	90.4	78.1	94.9
PaLWMG0806908500.01.P01	66	6	16	6	117	13.6	7.62	86.3	91.5	96.8	101	102.8	102.6	79.3	132.2	107.5
PaLWMG0100144001.01.P01	52	6	17	3	164	17.8	6.54	100.7	89.5	106.3	96.3	95.5	96.5	124.7	92.3	98.2
PaLWMG0806889800.01.P02	33	6	15	6	203	22.3	4.89	112	96.1	109.1	94.5	92.9	92.1	118.1	88.2	97
PaLWMG0201680600.01.P01	42	9	23	9	193	20.7	7.65	92.2	88.6	97.4	103	99	100.7	115.1	103	100.8
PaLWMG0806475900.01.P01	24	9	12	9	507	55.6	4.41	93.7	96.3	98.1	93.5	92.7	91.8	90.5	125.5	118
PaLWMG0202274700.01.P01	36	8	12	6	319	34.3	8.94	88	114.5	101.5	85.9	87	89.3	59.7	136.9	137.1
PaLWMG0403414400.01.P01	18	7	14	6	382	40.7	8.87	115.7	129.2	100.6	103.3	104	102.5	78.4	78.7	87.7
PaLWMG0705668500.01.P01	43	7	22	2	159	17.7	10.54	88.4	108.2	113.2	101	92.1	101.2	87.7	110.7	97.6
PaLWMG0303113200.01.P01	43	7	11	7	227	25.5	4.98	103	72.5	102.6	99.4	95	90.5	123.4	101.2	112.4
PaLWMG0605033100.01.P02	26	12	15	11	564	61.2	4.44	97.7	87.8	104.2	95.6	93.1	94.2	131.9	93	102.5
PaLWMG0504614600.01.P01	30	7	14	7	328	38	5.36	90.7	112.9	99.4	97.3	96.3	97.6	66	112.2	127.5
PaLWMG0100460500.01.P03	31	13	17	1	514	55.8	9.23	96.2	103.7	100.4	95.2	93.3	83.6	135.1	94.6	97.9
PaLWMG0806954300.01.P01	16	8	19	4	515	57.2	7.64	103.5	106.9	104.4	96.4	94.9	97.8	79.2	100	116.8
PaLWMG0100870600.01.P02	27	14	19	13	568	65	6.74	120.7	102.3	103.1	93.9	96.4	96	128.2	71.1	88.3
PaLWMG0101163600.01.P04	33	7	21	5	182	20.4	11.24	85.4	83.7	98.2	110.1	105.4	102.5	103.3	111.1	100.3
PaLWMG0101004100.01.P01	28	10	19	10	354	39.8	6.65	111.6	125.4	102.9	100.3	104	103.8	90.2	70.2	91.6
PaLWMG0302689400.01.P01	44	6	18	5	189	21.4	7.71	94.9	109.1	92.9	78.8	81.1	87.9	79	147.7	128.6
PaLWMG0201554100.01.P01	19	12	17	12	811	92.3	6.19	122.8	102.4	98.3	95.5	95.6	95.1	138.2	70.7	81.4
PaLWMG0806610900.01.P02	20	3	10	3	184	20.7	9.13	95.4	88.7	101.2	113.6	101.6	105.5	100.1	102.1	91.8
PaLWMG0405726900.01.P02	36	5	12	5	177	19.5	4.86	106.5	109.1	93	106.8	106	110	105.7	79.5	83.3
PaLWMG0403662600.01.P03	36	8	15	8	304	33.2	7.94	110.7	107.9	99.1	102.1	102.3	102.7	105.4	80.4	89.3
PaLWMG0302528800.01.P01	30	14	20	14	644	71.7	5.78	96.2	85.8	90	102.8	101.6	103.7	125.7	98.8	95.4
PaLWMG0605628400.01.P01	33	14	21	13	489	55.9	5.39	111.8	108.6	108.1	97.1	99.3	99	92.5	84.7	98.9
PaLWMG0100269100.01.P01	3	2	12	1	547	60.3	6.52	91.1	92	100.7	107.8	109.5	102.5	81.1	106.8	108.6
PaLWMG0100244900.01.P01	18	8	11	7	504	55.3	4.89	115.6	105.6	107	102.1	101.6	98.3	110.4	74.3	85.2
PaLWMG0605107500.01.P01	35	3	8	3	123	13.7	9.82	89.4	77.9	96	95.4	96.5	96.5	115.4	121.8	111.1
PaLWMG0403701600.01.P01	24	11	20	8	446	49.6	5.99	111.6	94.4	96.7	104.6	103.9	103.4	152.8	71	61.5
PaLWMG0403679400.01.P02	30	12	14	12	457	52.7	6.11	100.8	83.3	103.3	102.4	99.1	97.2	103.4	112.4	98.2
PaLWMG0403763200.01.P01	20	18	24	17	870	96.2	5.68	110.6	84.8	99	92.1	90.8	89.3	157.7	86.5	89.2
PaLWMG0605304600.01.P01	29	13	14	13	594	64.8	7.74	93.2	90.8	100.5	95.1	96.1	92.6	102.1	115.7	113.8
PaLWMG0403746100.01.P01	24	10	15	10	526	56.2	8.48	109.3	122.9	108	97.7	96.1	100.7	68.2	91.5	105.6
PaLWMG0506554900.01.P01	26	5	13	5	258	28.5	8.13	103	113.3	108.5	90.8	91.4	91.9	67.6	115.8	117.7
PaLWMG0604956500.01.P01	49	11	18	11	227	25.5	5.24	98.5	110.8	101.4	94.3	92.1	90.7	86.2	110.7	115.2
PaLWMG0504575900.01.P01	32	6	14	6	226	24.8	5.91	88.1	89.4	94.7	100.1	96.9	101	87	129.9	112.8
PaLWMG0705931100.01.P01	28	6	11	6	249	27.5	9.32	94.1	88.7	98.4	98.4	99.5	94.4	110	107.7	108.9
PaLWMG0101386200.01.P01	22	6	12	6	259	27.7	8.07	88.4	72.2	80.9	126.5	118.7	126.5	147.9	72.4	66.5
PaLWMG0201607700.01.P01	23	7	13	7	307	33.7	10.32	94.6	88.8	104.2	99.1	99	95.3	82.3	123.5	113.3
PaLWMG0303071700.01.P01	31	11	20	10	454	50.4	6.67	109.6	90.2	98.5	97.4	99.6	98.3	138	80.4	87.9
PaLWMG0705687200.01.P01	28	8	12	8	344	37.2	5.71	120.4	103.8	107.2	96.9	94.3	93.9	115.3	80.9	87.4
PaLWMG0706071200.01.P01	30	7	9	6	316	33.5	9.11	92.7	70.9	99.9	97	98.5	100.9	159.3	86.7	94
PaLWMG0605202900.01.P01	24	19	26	19	1035	117.1	8.28	112.3	90.6	99.9	94.5	93.6	92.5	127.2	92.5	96.9
PaLWMG0101099900.01.P01	32	8	11	8	302	34.8	6.65	111	123	104.3	103.9	106.4	106.6	81.1	76.3	87.6
PaLWMG0101191300.01.P03	13	11	24	10	823	92.7	11.53	80.8	92.7	91.5	103.8	104.4	85.1	100.4	119.3	122
PaLWMG0504482300.01.P01	33	7	17	3	183	20.9	10.35	90.8	82.1	99.9	103.8	100.2	101.7	90.6	122.3	108.6
PaLWMG0100951200.01.P01	45	6	14	6	174	18.8	9.23	88.2	83.7	106.1	106	103.5	104.5	96.5	110.7	100.7
PaLWMG0100210500.01.P01	15	7	12	7	557	61.9	9.2	108.9	87.9	100.7	98.4	99	94.6	130.6	85.1	94.7
PaLWMG0403349200.01.P02	24	14	21	2	598	69	6.21	121.3	129.2	108.4	104.1	102.5	100.9	70	77.1	86.3
PaLWMG0302786000.01.P01	53	12	22	12	210	23.1	9.44	98.1	100	95	92.2	98.7	103.9	91.9	110.3	110
PaLWMG0100962400.01.P01	21	15	19	15	731	82.1	5.38	102.3	105.8	95.4	102.9	103.4	103.5	90.5	92.9	103.4
PaLWMG0403469500.01.P01	21	12	27	1	528	59.1	8.31	86	175.1	141.9	97.7	95.3	99.8	24.7	94.4	85.1
PaLWMG0604773400.01.P01	21	11	15	11	595	66.9	6.2	116.1	98.7	105.6	100.3	95.7	91.1	130.1	75.9	86.4
PaLWMG0101378600.01.P01	32	10	17	10	309	35.8	8	99.2	121.3	94.2	109.8	109.6	114	116	64.3	71.6
PaLWMG0302490600.01.P02	20	10	14	10	521	56	6.48	81.9	99	95.1	96.4	96.5	99	88.7	126.2	117.4
PaLWMG0809980800.01.P01	31	11	24	7	380	41.2	7.01	115.8	113.8	108.9	99.1	99.4	99.5	79.9	88.8	94.7
PaLWMG0806553400.01.P01	36	12	18	12	294	32.2	8.47	96.6	97.6	85.7	98.8	104.9	106.2	132.9	84.6	92.8
PaLWMG0201754700.01.P02	17	11	21	11	688	75.2	6.44	100.2	109.6	100.4	94.4	96.3	96.1	73.5	114	115.5
PaLWMG0806807600.01.P02	22	9	11	8	612	66.7	5.62	107.4	106.4	108.9	100.3	97.2	96.5	94.2	93.4	95.7
PaLWMG0706121500.01.P01	40	10	18	10	287	32.2	7.08	109.3	101.3	103.6	92.9	93.5	95.4	108.6	94.9	100.6
PaLWMG0403467000.01.P02	20	7	11	7	420	45.8	4.65	83.2	80.3	99.1	105	100.2	100.9	131.7	98.9	100.7
PaLWMG0706072800.01.P03	37	11	15	10	417	46.5	6.55	92.3	87	103.5	101.2	96.1	96.7	91.2	117.8	114.2
PaLWMG0604768400.01.P01	33	9	14	9	320	34.4	5.05	84	93.3	96.3	94.6	98.6	92.5	70.8	144.9	125
PaLWMG0806733800.01.P02	7	4	10	4	627	68.2	8.16	97.9	103	95.2	112.3	113.4	114.2	133.6	65.2	65.3
PaLWMG0705857100.01.P01	47	14	21	14	300	33.1	6.89	102.9	95.6	100.5	103.8	105.6	107.5	108.7	89.7	85.5
PaLWMG0705758800.01.P01	56	7	21	3	120	13.8	9.85	85.2	86.6	109.7	100.2	94.2	92	49	162.4	120.9
PaLWMG0100548000.01.P01	31	9	12	2	343	37.3	6.19	114.1	99.4	118.3	103.5	96.7	97.9	73.2	97.8	99.2
PaLWMG0708730400.01.P01	33	7	25	2	202	22.5	8.92	72.4	85	94.9	94.6	103.9	97	105.8	134.1	112.2
PaLWMG0605310300.01.P01	40	11	15	11	397	45.9	8.34	105.8	92.2	92.9	106.2	105.8	106.6	131.7	74.9	84.1
PaLWMG0706016000.01.P01	36	14	20	14	401	46.1	8.18	112	115.7	107.5	96.2	97.8	94.3	85.1	91.7	99.8
PaLWMG0705900900.01.P01	36	6	13	6	266	27.9	6.89	94.9	102.4	103.5	94.9	94.7	93.2	75.7	122.1	118.5
PaLWMG0504377300.01.P01	36	10	17	10	307	35.3	8.62	96.9	84.2	97.5	99.9	98.5	99.7	128.9	105.2	89.3
PaLWMG0706076400.01.P02	18	8	12	8	565	62.2	5.47	104.3	104.4	105.3	100.3	102.7	101.5	93.6	89.4	98.6
PaLWMG0604844300.01.P01	51	3	12	3	95	10.2	9.89	99	115.2	93.1	98.9	96	96.8	60	120.2	120.9
PaLWMG0101418300.01.P04	16	14	18	14	1048	114.9	5.02	113.3	93.6	113.8	95	94.9	92.9	122	79.1	95.4
PaLWMG0202090400.01.P01	45	10	27	10	262	28.7	10.13	89.1	77.9	93.5	101.6	105	105.1	146.7	93.3	87.7
PaLWMG0504138700.01.P01	28	21	36	21	613	69	7.88	113.8	107.4	106.7	95.3	95.6	98.5	102.8	84.5	95.3
PaLWMG0100075100.01.P01	42	18	28	18	569	63.3	7.23	99.3	118.1	111.7	92	95.5	94.2	103.8	92.2	93.2
PaLWMG0101238300.01.P01	54	7	10	7	204	22.9	5.47	104.5	89.4	98.6	100.3	100.5	101.5	123.1	91.5	90.7
PaLWMG0202022500.01.P02	25	5	12	5	235	25.7	9.86	114.4	112.8	94.2	106	106.7	106.6	83.7	89.1	86.3
PaLWMG0202051100.01.P04	39	12	14	1	365	39.3	8.18	101.5	91.9	108.6	108.5	100.7	107.1	85.7	93	102.9
PaLWMG0806658200.01.P01	51	4	21	3	81	9.5	9.7	98.7	86.5	98.2	102.7	101.5	99.9	115.4	106.6	90.6
PaLWMG0404018800.01.P01	27	4	20	4	135	14.9	7.49	97.2	101.1	91	108.2	109.7	110.6	113.9	79.6	88.7
PaLWMG0504613100.01.P01	23	6	14	6	298	32.5	5.72	99.7	101.8	101.6	101.3	99.6	98.5	70	112.8	114.6
PaLWMG0706102700.01.P01	44	4	16	4	79	8.8	9.25	87	90.8	93.9	97.4	95	97.9	78.7	137.2	122
PaLWMG0202235300.01.P02	45	9	17	9	241	26.3	8.15	127.8	116.3	102.4	102	107.9	108.8	96.7	61.8	76.2
PaLWMG0807219100.01.P01	27	8	12	7	310	34.4	7.36	114.6	104.5	97.9	105.1	106.6	107.7	127.5	63.6	72.4
PaLWMG0810884500.01.P01	51	9	17	3	255	28.2	6.16	84.8	60.9	103.9	104.4	102.9	102.4	59.5	156.1	125.1
PaLWMG0705736200.01.P01	18	9	17	9	483	52.1	5.54	99.8	72.5	100.2	110.7	104.4	102.2	146.2	83.8	80.3
PaLWMG0101146800.01.P01	27	8	11	8	377	42.1	5.39	107.8	116	99.4	103.9	100.2	103.5	103.9	77.5	87.8
PaLWMG0504345000.01.P01	21	21	23	21	1085	121.6	5.53	106	104.3	106.3	94.8	93.5	93.7	103.7	93	104.8
PaLWMG0706310300.01.P01	18	5	9	5	328	34.5	5.9	105.7	149	100.7	99.1	102.3	103.5	69.8	71.5	98.4
PaLWMG0605435000.01.P02	18	15	18	12	886	101.4	7.25	113.4	115.4	104.2	96.9	96.8	98.4	99.3	81.6	93.9
PaLWMG0303536900.01.P01	49	3	8	3	115	12.6	7.15	82.2	89.3	93.5	92.6	123.7	93.2	80.8	123.2	121.6
PaLWMG0101170600.01.P01	33	4	13	4	153	17.8	9.33	79.6	79	93.3	106.2	103.8	103.8	130	99.6	104.7
PaLWMG0705894200.01.P01	21	8	18	8	467	51.7	3.88	83.7	89	102.9	98.5	103.6	93	92.1	115.5	121.6
PaLWMG0101361400.01.P01	31	11	23	3	370	40.8	6.44	93.2	94	97.6	96.5	100.7	103.3	85.2	113.9	115.7
PaLWMG0504732400.01.P01	30	11	14	11	496	55.6	9.01	100.8	103.8	103.2	99.9	102.1	104	91.1	89.4	105.7
PaLWMG0504591700.01.P01	17	8	16	8	547	60.8	9.14	91.7	105.2	103.3	93.1	97.7	99	69.7	123.7	116.8
PaLWMG0100958900.01.P01	30	10	15	10	383	41.7	7.93	108	109.8	107.1	93.4	93.6	94.1	110	83.2	100.7
PaLWMG0807211100.01.P01	31	10	27	7	382	41.4	6.79	119.6	97.5	109.4	97.5	94.6	98.3	73.3	100.2	109.6
PaLWMG0202245900.01.P02	23	7	19	4	306	33.5	4.72	95.6	81.2	111.8	99.7	97.5	101.1	94.1	112.4	106.6
PaLWMG0607421000.01.P01	27	8	11	8	342	37.7	9.31	77.7	91.1	93.4	109	106.2	101.1	73.5	133.8	114.2
PaLWMG0806752700.01.P01	35	11	16	11	340	38.8	6.37	109.8	102.9	100.1	102.4	101.6	100.9	95.3	88.3	98.7
PaLWMG0100312000.01.P02	59	9	20	9	202	22.7	7.99	89.2	125.6	98.6	86.7	86.7	89.9	53.7	138	131.5
PaLWMG0605369100.01.P02	33	15	23	15	471	50.5	8.09	94.9	94.2	97.3	103.2	103	100.9	103.1	102.3	101.1
PaLWMG0504610000.01.P01	32	15	21	15	510	56.2	8.27	103.8	94.2	101.7	99.1	97.4	97.8	108.2	94.1	103.7
PaLWMG0806868600.01.P02	27	12	19	12	467	52.4	6.74	105.2	121.6	95.5	111.5	112.5	117.1	100.4	67.5	68.7
PaLWMG0705753100.01.P02	20	6	14	6	294	32.2	7.71	94.3	88.4	105.3	103.6	101.5	104	97.9	107	98.1
PaLWMG0302903500.01.P02	30	4	13	3	205	21.6	6.77	104.2	99.8	106.1	110.8	110.2	110.5	87.7	77.2	93.7
PaLWMG0806737900.01.P01	38	11	21	11	287	31.6	7.87	100.5	105.8	96.5	98.6	99.9	100.8	95.7	102.2	100
PaLWMG0806390800.01.P01	19	10	12	10	615	68	6.55	104.8	113.1	102.9	102	99.5	100.9	83.9	96	96.9
PaLWMG0100608000.01.P03	35	10	11	10	403	44.5	8.78	110.8	105.3	100.2	104.9	106.4	103.4	104.7	80	84.2
PaLWMG0203270300.01.P01	34	11	18	11	354	41.5	8.54	95.9	90.9	102.4	100.7	98.6	96.3	109.1	101.4	104.9
PaLWMG0201994900.01.P01	31	12	16	12	436	47.1	8.62	101.1	113.9	98.6	105.1	104.2	104.2	94.7	92.3	85.9
PaLWMG0504725600.01.P01	27	14	19	14	609	66	6.65	104.7	134.4	95.5	105.6	103.2	104.7	95.3	73.4	83.2
PaLWMG0302800800.01.P03	32	16	36	5	531	57.5	8.41	104.7	101.6	106.9	96.1	96.5	95.6	108.4	90.8	99.4
PaLWMG0806391400.01.P01	29	7	18	5	254	27.7	7.93	88.3	83.6	101.8	92.8	99	88.7	131.6	107.1	107.1
PaLWMG0101136800.01.P01	26	5	12	5	160	17.5	7.08	99.2	98.8	100.7	101.1	101.6	103.2	101.6	102.4	91.3
PaLWMG0100316700.01.P02	34	6	13	5	167	18.9	6.57	105	112.7	97.9	111.3	112.3	113.7	75.1	87.4	84.6
PaLWMG0100243400.01.P01	26	5	17	5	176	19.7	8.22	94.7	95.1	100.9	99.3	96.6	100	72.4	124	117
PaLWMG0605434400.01.P01	35	8	14	8	295	32.4	7.88	93	89.9	106.5	98.1	97.9	95.7	102.8	106.9	109.2
PaLWMG0504529900.01.P02	20	13	16	13	722	77	9.07	88.5	95.1	97.8	102.7	101.7	101.5	100.7	111.5	100.5
PaLWMG0202406600.01.P01	25	9	14	9	434	47.3	6.07	104.9	100.1	104.4	98.2	99.7	100.6	97.7	94	100.3
PaLWMG0303224300.01.P04	25	10	15	10	591	65.2	6.32	104.9	87.5	95.1	105.2	105.1	103.1	131.2	85.2	82.6
PaLWMG0101212400.01.P03	34	11	16	11	372	40.5	9.66	88.1	92.7	102.1	104.1	101	99.6	86	119	107.4
PaLWMG0705773400.01.P01	26	12	18	12	561	61.7	6.18	115.5	87.9	100.7	95.9	96.4	95.9	141.9	81.7	84
PaLWMG0605334800.01.P01	29	6	16	6	250	28.2	5.99	114.8	109.5	104	97	103.6	98.1	124	68.4	80.5
PaLWMG0100939100.01.P01	34	7	17	6	356	38.9	6.65	102.7	124.6	88.3	100	103.9	103	55.6	109	113
PaLWMG0504374800.01.P01	33	8	22	4	261	29.9	4.82	99.3	103.9	97.5	92.9	95.2	94.1	66.8	117	133.4
PaLWMG0504626600.01.P02	21	6	8	6	345	38.4	6.84	105.9	120.2	98.3	101.4	100.9	103	102.8	73.2	94.2
PaLWMG0101171700.01.P01	27	9	13	9	410	45.5	8.37	94.6	102.9	98.2	101.6	100.9	101.1	83.5	110.1	107.1
PaLWMG0605113100.01.P01	21	4	7	1	270	28.3	6.93
PaLWMG0806544700.01.P03	7	10	18	8	1592	174.2	5.78	96	98.8	97.3	97	92.1	94.9	98.2	114.1	111.5
PaLWMG0100334300.01.P02	29	8	14	8	320	36.4	7.71	99.9	102.2	102.8	88.5	90	88.3	100.5	112.5	115.3
PaLWMG0403678900.01.P02	34	13	18	13	381	42	5.34	88.6	83.3	100.1	112.1	106.3	105.5	98.3	108.9	96.9
PaLWMG0100842700.01.P02	21	12	14	8	664	74.2	7.02	100.6	112.5	104.8	102.7	98.8	96.4	76.4	105.7	102
PaLWMG0504464200.01.P01	12	2	11	2	130	14.1	4.75	79.9	79.7	94.3	113.4	109.3	111.7	105.9	114.4	91.4
PaLWMG0605397300.01.P03	30	19	24	14	608	67.7	8.09	91.8	95.6	92.2	100.1	101.4	101.3	103.9	104.9	108.8
PaLWMG0100906701.01.P02	18	7	12	7	555	63.6	6.71	105	96	109.8	93.9	89.4	86.3	95.5	108.9	115.1
PaLWMG0605138400.01.P01	33	7	15	7	230	25.9	5.58	97	92.8	103.4	99.8	95.5	94.5	77.3	121.8	117.9
PaLWMG0303045600.01.P01	54	8	16	1	130	14.8	9.42	76.5	77.7	96.5	97.9	100	96.4	60.6	172	122.5
PaLWMG0705688900.01.P05	19	10	13	10	661	75.8	5.96	101.7	105.6	101.4	97.1	98	93.7	105.6	91.9	105
PaLWMG0807188700.01.P01	50	9	19	3	255	28.3	5.81	94.9	66.6	98.3	99.3	95.1	99.1	60.8	159.6	126.3
PaLWMG0504131900.01.P02	14	11	14	11	1153	131.6	5.85	100.2	97.2	97.2	95.2	99.1	96.5	109.3	98.1	107.1
PaLWMG0607669400.01.P01	20	11	18	10	640	70.1	8.87	90.4	124.8	89.2	93.1	93.7	92	66.2	125.5	125.2
PaLWMG0705839800.01.P02	28	13	15	13	450	50.9	5.22	106.1	100.4	105.8	97.8	95.4	96	97	97.1	104.5
PaLWMG0202175600.01.P01	14	3	11	3	222	23.9	9.5	108.7	90.9	112.9	98.9	94.1	95.7	119.4	87.1	92.3
PaLWMG0100554000.01.P01	43	8	15	6	250	29.2	5.14	121.3	104.8	99.6	100	97.8	98.4	128.5	66.6	83
PaLWMG0806903700.01.P01	12	7	11	7	771	82.3	7.96	90.8	96.1	98.5	106.7	104.6	105.3	77	103.2	117.6
PaLWMG0705893000.01.P01	23	11	15	11	524	62.8	8.72	89.7	90.5	94.8	112.9	107.4	106.7	102.6	101.1	94.4
PaLWMG0303271300.01.P01	23	11	14	11	595	64.9	6.54	110.4	120.8	106.5	106.1	106.2	105.3	91.6	75.1	78.1
PaLWMG0100370000.01.P01	50	12	22	12	298	33.1	7.15	86.9	99.3	96	96.8	96.8	95.4	72.2	133.9	122.8
PaLWMG0101117600.01.P01	23	7	11	6	418	44.7	9.67	87.5	89.9	103.8	96.8	94.8	93.9	96.5	122.6	114.4
PaLWMG0101248100.01.P01	16	8	10	8	601	66.3	4.88	95.5	113.9	114.5	92.1	96.1	92.8	105	89.8	100.2
PaLWMG0806725000.01.P01	13	11	19	11	895	99.5	4.98	111.9	98.6	110.5	97.5	95.2	92.1	115	83.1	96.1
PaLWMG0302460400.01.P03	18	7	14	7	514	57.6	8.06	97	73.7	92.2	92.4	92.5	88.4	177	90.7	96.1
PaLWMG0706146500.01.P01	47	9	14	9	262	29.5	5.27	94.1	111.9	109.3	109.7	109.2	110.4	95	81.8	78.6
PaLWMG0101189700.01.P02	39	4	16	4	124	14.9	8.82	87.7	93.7	93.2	100.7	99.6	102.4	61.2	149.4	112
PaLWMG0706260800.01.P01	31	7	10	6	318	34.2	8.1	95.4	109.7	111.1	97.7	95.7	96.9	53.8	116.7	122.9
PaLWMG0705651300.01.P01	31	15	21	14	531	57.9	8.5	105.3	99.8	109.6	95.2	92.7	92.9	99.9	102.1	102.4
PaLWMG0806922800.01.P01	17	7	9	7	608	66	6.42	101.3	106.6	99	103.1	107.6	109.1	114.8	78.4	80.1
PaLWMG0100970200.01.P02	26	7	13	7	362	39.4	7.03	116.8	92.6	104.5	95.9	93.6	94.8	110	90.3	101.7
PaLWMG0101041300.01.P03	18	16	21	16	973	110	6.29	94.9	93.9	99.7	102.5	99.4	98.1	106.9	100.8	103.6
PaLWMG0302551700.01.P01	34	12	16	12	455	49.8	9.07	109.2	130.6	102.3	108.6	108.4	112.7	71.8	75.4	81.1
PaLWMG0302550000.01.P01	32	9	12	8	323	36.6	6.86	104.3	84.9	99.9	103.5	100	105.2	110	93.3	98.8
PaLWMG0806886800.01.P01	21	19	25	19	848	95.1	8.68	87	88.4	96.1	99.8	99.2	96.7	107.1	114.5	111.1
PaLWMG0202392400.01.P01	28	11	17	7	514	56.9	4.55	104.7	93.6	104.3	93.7	92.4	90.9	124.9	91.2	104.2
PaLWMG0101484401.01.P01	18	3	13	3	202	20.7	9.33	89.1	110.4	67.7	83.4	83.4	86.8	51	169.3	158.9
PaLWMG0504132900.01.P01	29	10	16	10	399	44.2	6.64	104.5	87.9	95.3	97.6	97.4	97.4	138.9	89.8	91.1
PaLWMG0100009700.01.P01	31	3	14	3	101	10.9	8.18	103.6	108.9	102.1	99.7	101.5	103.3	80.6	105.7	94.6
PaLWMG0605137500.01.P03	23	20	22	20	960	110.6	6.76	108.1	85.6	101.4	92.9	92.4	91.8	141.2	87.8	98.8
PaLWMG0604929600.01.P02	35	9	14	9	357	39	6.04	107	99.3	106.7	96.1	95	95.8	98.5	94.6	107.1
PaLWMG0100234600.01.P01	44	5	12	4	119	11.9	4.41	78.3	86.6	99.2	98.2	99.5	95.1	96.8	144.1	102.2
PaLWMG0605354500.01.P01	43	5	13	5	130	14	10.23	84.9	94.5	89	104	102.3	101.4	70.9	142.2	110.8
PaLWMG0605327400.01.P02	19	3	10	2	217	24	6.57	93.3	99.3	93.3	97.5	108.2	101.4	71.2	118.4	117.4
PaLWMG0504453500.01.P01	32	16	22	15	631	71.8	7.9	97.6	125.2	88.2	103.7	103	109.7	85.8	83.3	103.6
PaLWMG0403776300.01.P01	30	5	11	5	189	20.9	8.92	87.8	94.6	93.4	100.6	101.6	109.4	85.7	119.6	107.3
PaLWMG0201499100.01.P01	67	11	21	11	132	14.9	6.79	83.8	86.7	96.3	104.9	103.8	102.2	90.7	129.5	102
PaLWMG0100565600.01.P03	31	13	16	1	514	55.9	9.16
PaLWMG0807247500.01.P01	47	8	10	8	187	20.4	7.44	92.2	96.6	93	108.1	110.8	109.8	78.8	109.4	101.4
PaLWMG0202254700.01.P01	25	9	12	8	450	50.5	5.63	109.1	108.2	105.2	105.2	100	101.6	110.3	72.5	87.9
PaLWMG0403410400.01.P01	21	3	7	3	206	22.7	5.16	89.8	84.6	96.9	118.1	112.4	109.8	102.8	90	95.6
PaLWMG0302676400.01.P01	18	4	6	4	348	38.4	4.59	91.1	95.6	104.5	96	98.2	95.4	92.7	110.9	115.6
PaLWMG0810028700.01.P01	15	4	16	4	284	30.2	8.7	81	102.2	101.1	86.7	88.7	86.1	61.4	161	131.7
PaLWMG0806778400.01.P01	26	4	10	2	184	20.9	8.13	98.3	113.4	102.5	93.9	93.5	98	65.4	114.1	120.9
PaLWMG0605335000.01.P01	24	8	17	8	312	34.8	8.66	105.2	110.4	99.3	102.3	99.1	97.2	86.7	95	104.7
PaLWMG0504406300.01.P01	23	10	15	10	480	52.7	6.43	96.3	100.2	99.8	95.1	94.5	93.4	138.3	87.4	94.9
PaLWMG0806568000.01.P02	29	4	18	3	138	14.8	10.32	75.3	77.7	82.8	101.9	107	110.7	110.9	134.1	99.5
PaLWMG0504186000.01.P01	20	16	23	16	833	91	6.4	110.3	97.7	105.5	92.2	91.1	90	120.4	90.3	102.4
PaLWMG0604833400.01.P01	25	7	10	7	359	40.2	5.66	110.5	82.9	99	101.5	95.7	98	148.2	74.5	89.8
PaLWMG0604832100.01.P04	26	17	20	16	653	72.2	5.48	102.1	89.1	101.1	96.6	94.4	92.6	100.3	109.4	114.5
PaLWMG0504435800.01.P01	21	6	14	6	356	38.3	5.83	99.8	96.1	105.4	99.6	100.1	98.2	96	102.7	102.2
PaLWMG0405591800.01.P01	40	6	9	6	181	19.7	8.65	84.7	89.3	96.6	106.7	107.9	108.8	101.7	104.6	99.6
PaLWMG0202289600.01.P01	43	7	14	7	207	23.1	8.32	103.2	81.7	114.5	104.8	100.9	101.9	118.9	90	84
PaLWMG0303045700.01.P01	23	8	11	8	464	52.4	4.92	108.6	125.7	101.2	110	105.8	105.2	99.6	72.3	71.5
PaLWMG0100270100.01.P01	47	4	11	3	130	13.5	7.91	107	97.2	123.6	90.9	91	94.6	40.9	140.9	113.9
PaLWMG0504243400.01.P01	22	6	11	3	349	38.2	6.3	146	74.8	103	87.2	88.2	85.6	191.5	58.9	64.7
PaLWMG0100817800.01.P01	15	8	14	8	613	68.6	7.15	109.9	97.3	99.9	97	94.2	97	122.3	84.4	98.1
PaLWMG0605058600.01.P01	60	6	11	6	102	11.5	8.97	88.2	76.2	98.3	105.8	107	108.6	132	98.4	85.5
PaLWMG0404875200.01.P01	40	7	14	4	210	23.5	6.65	104.3	139.2	94.1	112.8	109.4	110.1	86.4	68.9	74.7
PaLWMG0202244500.01.P01	48	5	38	3	112	12.7	10.56	93.1	88.1	100.1	102.1	103.5	101.7	95.7	113.7	102
PaLWMG0101153000.01.P01	25	6	7	6	424	46.7	5.36	112.9	107.3	111.8	95.2	100.8	100.6	94.9	86	90.4
PaLWMG0806951500.01.P01	26	14	19	11	562	60.6	6.7	103.7	113.5	103.8	100.1	93.7	89.6	103.2	94.9	97.6
PaLWMG0202082100.01.P01	9	17	17	17	2269	254	8.75	91.1	92.3	99.2	100.7	99.4	97.5	99.4	109.3	111.2
PaLWMG0302937900.01.P02	21	8	13	8	458	51.2	7.08	106.6	152.8	113.2	95.3	96	95.6	68.5	81.6	90.3
PaLWMG0605372800.01.P01	39	7	26	2	110	12.4	11.43	89.8	88.3	87.9	116.7	114.4	107.1	79.2	126.2	90.3
PaLWMG0806762200.01.P02	26	14	16	14	663	74.1	8.13	106.6	99.8	105.3	98.1	96.5	97	105	91	100.7
PaLWMG0705796000.01.P01	17	5	11	5	331	36.2	6.86	86.9	102.9	99.7	90.9	88.2	93.6	66.1	149.4	122.2
PaLWMG0302662700.01.P01	43	8	13	8	272	30.4	8.15	107.2	96.5	111.2	100	98.6	97.5	94.6	94.1	100.3
PaLWMG0303840400.01.P04	24	13	16	11	710	80.3	7.93	94.2	150.9	90	104.2	101.8	100.9	58.7	89.7	109.6
PaLWMG0101045300.01.P01	12	5	11	5	497	52.5	8.63	111.7	123.2	113	119.4	120.8	124.2	48.8	62.9	76
PaLWMG0100946200.01.P01	20	14	18	14	742	81	6.7	107.1	102.8	103.8	92.9	94.2	95.2	107.1	95.7	101.2
PaLWMG0504342700.01.P01	25	8	10	4	416	46.5	4.96	98.8	113.1	94.9	106.4	100.3	96.8	82.3	97.9	109.4
PaLWMG0605475500.01.P01	30	7	14	2	231	26.1	8.34	101.4	117.3	84.9	100.6	101.5	107.6	76.6	98.9	111.2
PaLWMG0100647700.01.P01	12	6	8	6	671	74.5	9.26	99.5	71.5	94	92.7	90.8	87.8	185.2	81.3	97.2
PaLWMG0403911400.01.P01	6	3	11	3	531	59.5	6.42	95	112	99	95.7	97.2	102.6	73.2	117.2	108.1
PaLWMG0806973500.01.P01	39	10	16	3	318	34.7	5.16	107.3	103.6	110.5	100.8	103.3	97.8	80.9	88.1	107.7
PaLWMG0101218900.01.P01	38	9	18	9	209	23.3	9.29	99.6	98.1	101.6	100.6	104.1	101.6	91.1	105.7	97.5
PaLWMG0604886400.01.P01	21	7	12	7	457	51.4	8.57	101.2	96	98.8	105	102.1	98.7	95.1	96.6	106.5
PaLWMG0506613300.01.P01	15	7	19	7	482	53	6.24	93.1	94.6	101.1	99.8	96.8	95.3	72.3	137	110
PaLWMG0404045100.01.P01	49	3	14	3	100	10.8	9.41	98.3	104.4	94.9	113.5	112.5	119.8	87.6	80.2	88.9
PaLWMG0101216900.01.P01	45	8	16	7	220	25.2	9.55	89.4	96.2	92.6	93.3	97	99.3	89.2	124.8	118.1
PaLWMG0504252800.01.P01	34	14	23	9	395	44.7	8.46	105	91.4	106.4	97.3	97.2	92.7	115.6	96.2	98.1
PaLWMG0101349100.01.P01	32	11	16	11	463	51.2	5.47	122.8	98	94.7	97.5	97.7	95.7	149.3	67	77.3
PaLWMG0100258600.01.P01	9	5	15	3	576	62.7	4.74	109.4	132.7	108.5	88	87.3	86.5	46.3	129.1	112.1
PaLWMG0504386900.01.P02	17	5	8	5	518	56.9	6.39	94.6	103.7	98.5	102.9	110.2	107.8	83.2	102.2	96.8
PaLWMG0403534300.01.P01	51	9	18	9	186	20.9	4.46	99.9	91.2	97.6	99.7	100.3	100.9	111.4	97.3	101.6
PaLWMG0101173000.01.P01	29	13	14	13	649	72.6	6.15	100.8	90.5	98.6	91.1	93.5	92.3	166.1	78.8	88.3
PaLWMG0302444100.01.P01	12	8	12	7	803	91.2	5.2	89	137.6	85.2	104.6	104.8	103.7	60.1	99.5	115.4
PaLWMG0101321000.01.P02	21	12	15	11	728	81.3	5.67	116.1	112.1	107.3	98.1	98.5	98.6	102.7	77.7	88.9
PaLWMG0506918200.01.P01	25	4	9	4	157	17.3	9.06	84.9	82.9	89.4	107.3	100.5	103	85.5	133.7	112.8
PaLWMG0100592501.01.P01	45	8	16	4	220	24.2	5.03	91.3	100.1	89.1	96.3	104.1	118.1	117.6	88.5	95
PaLWMG0101314000.01.P01	29	7	15	7	321	34.2	8.25	78.5	101.4	97.6	94.4	93.6	92.4	87.3	137.7	117
PaLWMG0605427000.01.P01	23	4	11	2	186	20.2	5.59	97.3	79.9	94.1	102.9	107	94.6	132.2	96.2	95.8
PaLWMG0100770600.01.P01	25	7	12	3	306	35	5.01	105.4	110.4	104	100	104.4	101.9	111.2	74.8	87.8
PaLWMG0403485600.01.P01	35	14	19	14	469	50.8	6.6	116.4	100.5	111.2	93.5	93.9	92.1	122	80.8	89.5
PaLWMG0100489100.01.P01	42	12	17	12	319	34.9	8.85	92.3	85.2	101.9	96.8	94.3	93.3	97.3	127.2	111.6
PaLWMG0100341200.01.P01	35	8	16	8	236	25.4	7.61	92.2	95.1	90.7	103.3	121.1	112.9	83.5	107.9	93.4
PaLWMG0705668300.01.P01	12	5	7	5	667	70.1	6.04	89.1	95.5	104.2	99	97.1	97.5	91.1	116.3	110.4
PaLWMG0100178800.01.P01	38	4	18	4	143	16	9.7	93.6	99.5	97.4	107.8	109	108.8	79.7	104.3	99.8
PaLWMG0101327400.01.P01	21	10	13	8	661	75.2	5.21	104.5	128.2	96.9	104.1	106.7	110.6	64.8	85.9	98.2
PaLWMG0604798900.01.P01	31	8	14	8	239	25.9	6.7	114	115.7	109.8	96.4	95.8	95.7	98.4	79.7	94.5
PaLWMG0705868300.01.P02	21	5	9	5	307	34.1	5.38	100.4	107.6	102.8	100.2	100.7	106.2	81.7	104.6	95.7
PaLWMG0202254500.01.P01	17	10	17	9	567	64.2	7.23	93.8	113.3	94.6	95.4	95	96.3	85.8	110.8	114.9
PaLWMG0202426400.01.P01	28	4	12	4	170	18.7	9.36	81.9	88.5	94.3	102.7	100.6	101.7	81	133.9	115.4
PaLWMG0809878600.01.P01	46	10	13	8	291	31.7	4.73	109.8	94.5	113.6	94.2	91.3	91.5	127.4	82.3	95.4
PaLWMG0504309900.01.P01	40	8	11	8	280	29.8	7.65	90.6	86.1	105.4	100.8	99.5	98.5	86.2	125.2	107.7
PaLWMG0504674500.01.P01	22	19	28	19	839	92.7	5.3	111	110.1	104.6	97.7	97.1	97.2	102.8	82.1	97.2
PaLWMG0203094000.01.P01	54	8	20	8	142	15.8	10.36	96.6	78.5	80.5	114.6	122.1	118.6	133.1	81.4	74.7
PaLWMG0202396000.01.P01	18	5	12	4	396	43.9	6.13	107.5	101	99.4	98.4	97.9	100.3	119	81.9	94.6
PaLWMG0202267700.01.P01	23	6	16	6	289	30.6	8.92	95.9	88.4	99.2	103.5	104.4	106	102.5	109.1	91.2
PaLWMG0100057600.01.P01	60	5	10	5	112	13.4	7.94	77.6	77	87.9	112.3	106.4	101.7	145.5	105.5	86.1
PaLWMG0706225200.01.P03	9	5	10	2	695	76.9	5	94.4	102.3	106.8	111.8	111.3	111.9	71.1	89.6	100.8
PaLWMG0807216100.01.P01	46	3	8	3	125	13.3	8.6	82.9	96.1	111	112.1	111.3	111.9	58.9	118.6	97.3
PaLWMG0101315200.01.P02	29	11	15	11	451	50.5	7.46	113.7	114.5	95.8	99.6	104.4	102.7	113.6	73.9	81.8
PaLWMG0100908400.01.P01	22	8	12	8	485	53.2	6.29	96.1	103.9	99.5	103.4	99.7	99.4	90	107	101
PaLWMG0806953300.01.P01	20	3	10	3	194	20	11.37	92.2	80.8	96.4	115	115.6	112.6	111.6	89.6	86.2
PaLWMG0403875800.01.P01	46	5	18	5	132	15	6.2	82.1	92.6	93.9	102.5	103.6	103.1	66.6	143.8	111.8
PaLWMG0101425100.01.P01	26	10	14	10	499	53.7	7.85	76.1	75.4	80.6	117.7	116	116.3	125	108.1	84.7
PaLWMG0405706300.01.P01	28	4	12	4	198	21.2	4.68	85.5	91.8	99.8	103.4	101.2	100.7	92	122.1	103.5
PaLWMG0806595300.01.P01	30	7	9	7	276	29.8	6.54	99.4	100.4	95.4	109.9	102.5	106.8	102.4	91.2	91.9
[truncated: 6,510 more rows]
